# Supplementary material for: Streptococcus pneumoniae in the heart subvert the host response through biofilm-mediated resident macrophage killing
Source: PubMed Central journal article supplement (PMC5589263; doi:10.1371/journal.ppat.1006582), 2017-08-25

**Fig S3**

Isotype Controls for microlesions components  
within Infected Heart

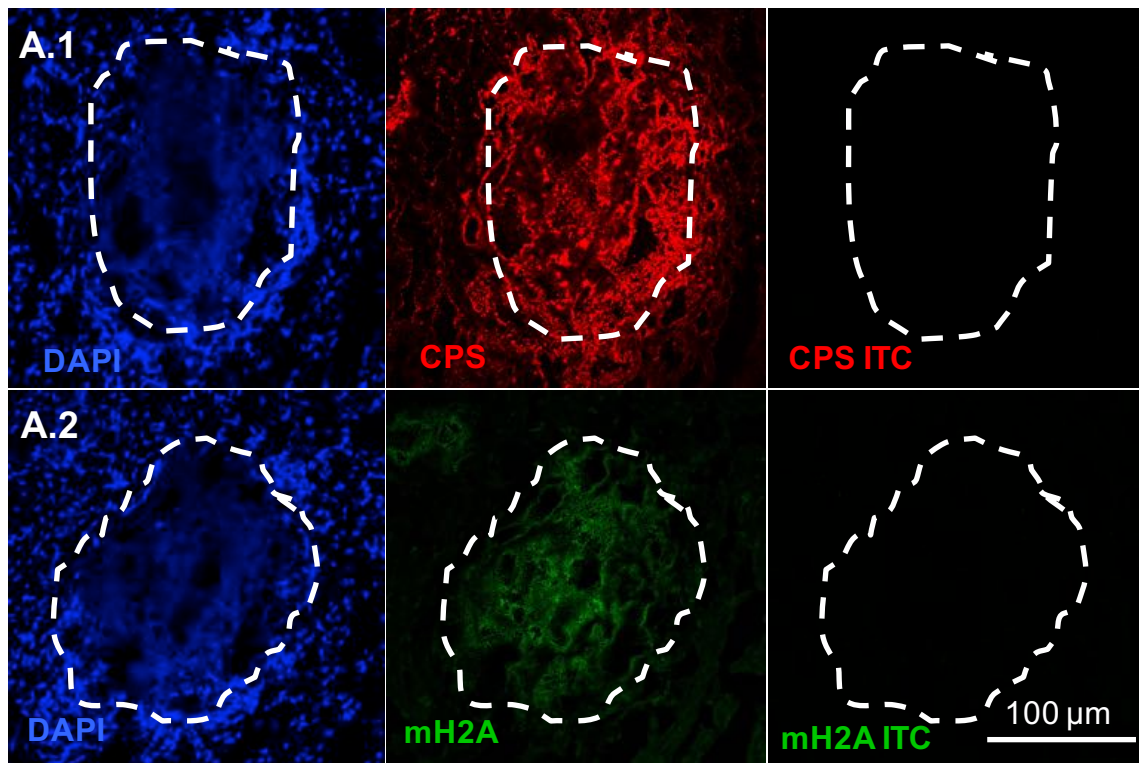

Supplement: ppat.1006582.s003.pdf [file ppat.1006582.s003.pdf]
