# Supplementary material for: Streptococcus pneumoniae in the heart subvert the host response through biofilm-mediated resident macrophage killing
Source: PubMed Central journal article supplement (PMC5589263; doi:10.1371/journal.ppat.1006582), 2017-08-25
Supplement: ppat.1006582.s005.pdf [file ppat.1006582.s005.pdf]

**Fig S5**

Uninfected

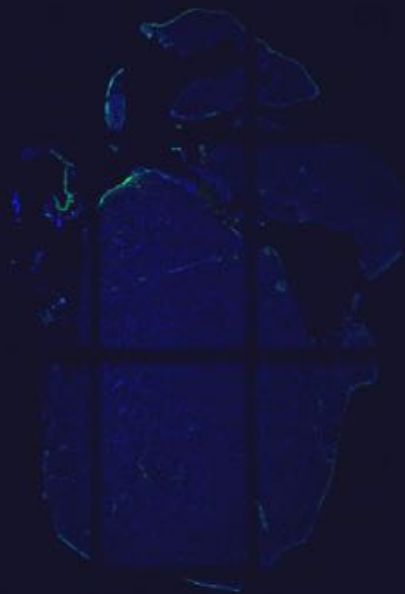

DAPI CPS Galactose

TIGR4 infected

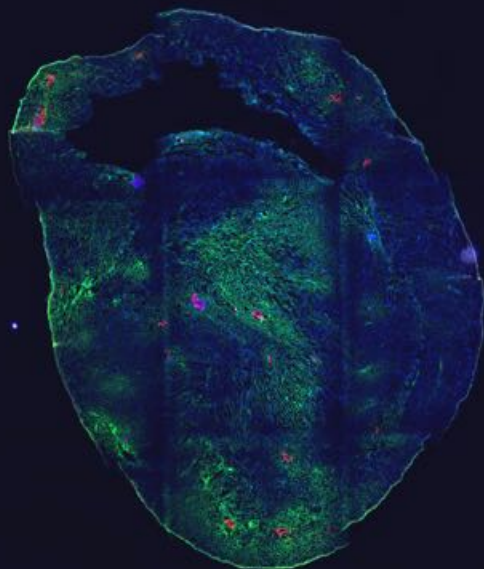

DAPI CPS Galactose

Infarcted

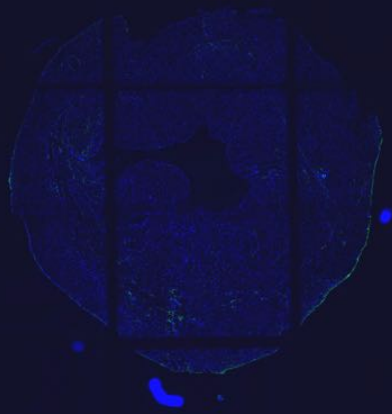

DAPI CPS Galactose

Sham

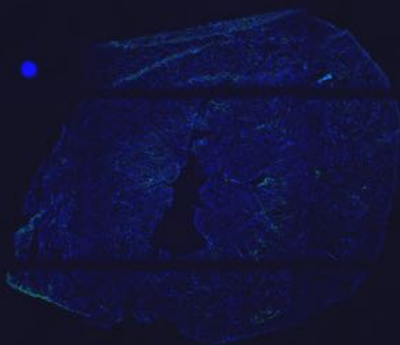

DAPI CPS Galactose

1mm
