# Supplementary material for: Streptococcus pneumoniae in the heart subvert the host response through biofilm-mediated resident macrophage killing
Source: PubMed Central journal article supplement (PMC5589263; doi:10.1371/journal.ppat.1006582), 2017-08-25

**Fig S7**

**A) Biofilm pneumococci versus planktonic pneumococci, RNA-seq vs. qRT-PCR**

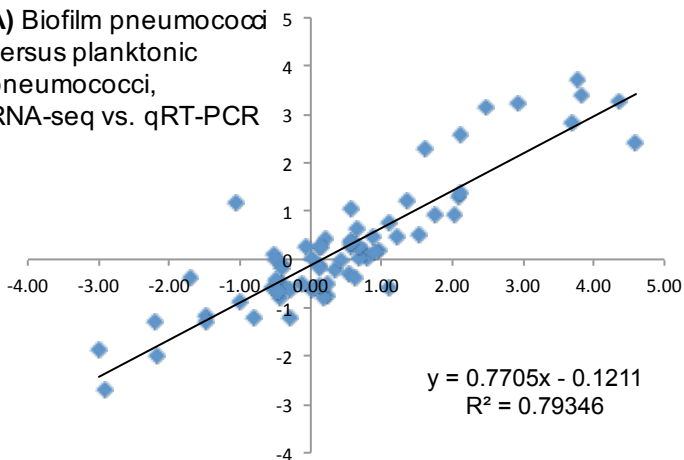

**B) HIP versus planktonic pneumococci, RNA-seq vs. qRT-PCR**

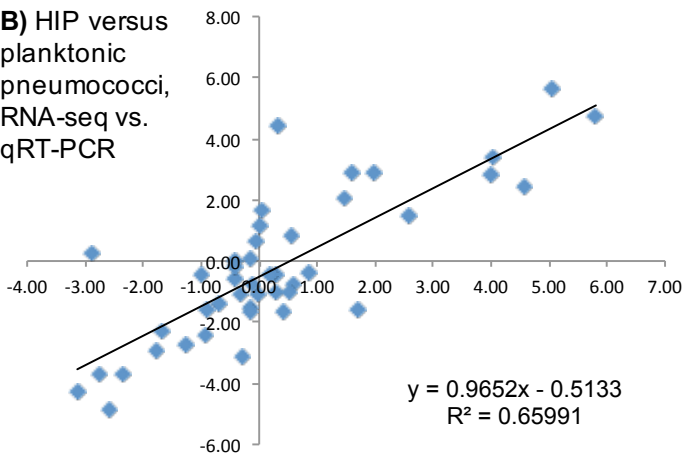

**C) BIP versus planktonic pneumococci, RNA-seq vs. qRT-PCR**

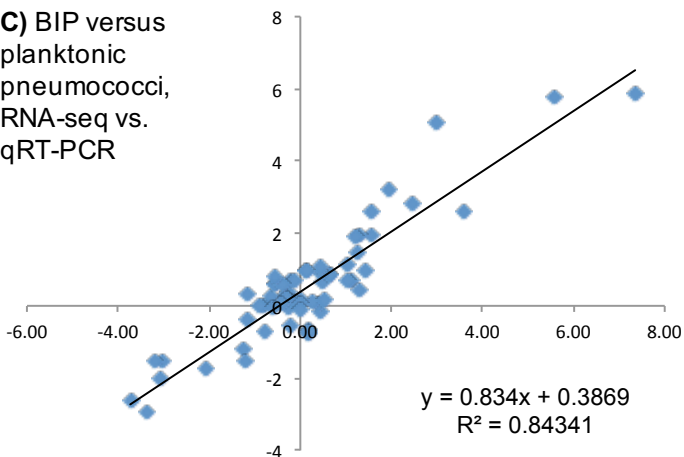

Supplement: ppat.1006582.s007.pdf [file ppat.1006582.s007.pdf]
