# Supplementary material for: Streptococcus pneumoniae in the heart subvert the host response through biofilm-mediated resident macrophage killing
Source: PubMed Central journal article supplement (PMC5589263; doi:10.1371/journal.ppat.1006582), 2017-08-25

Figure S8

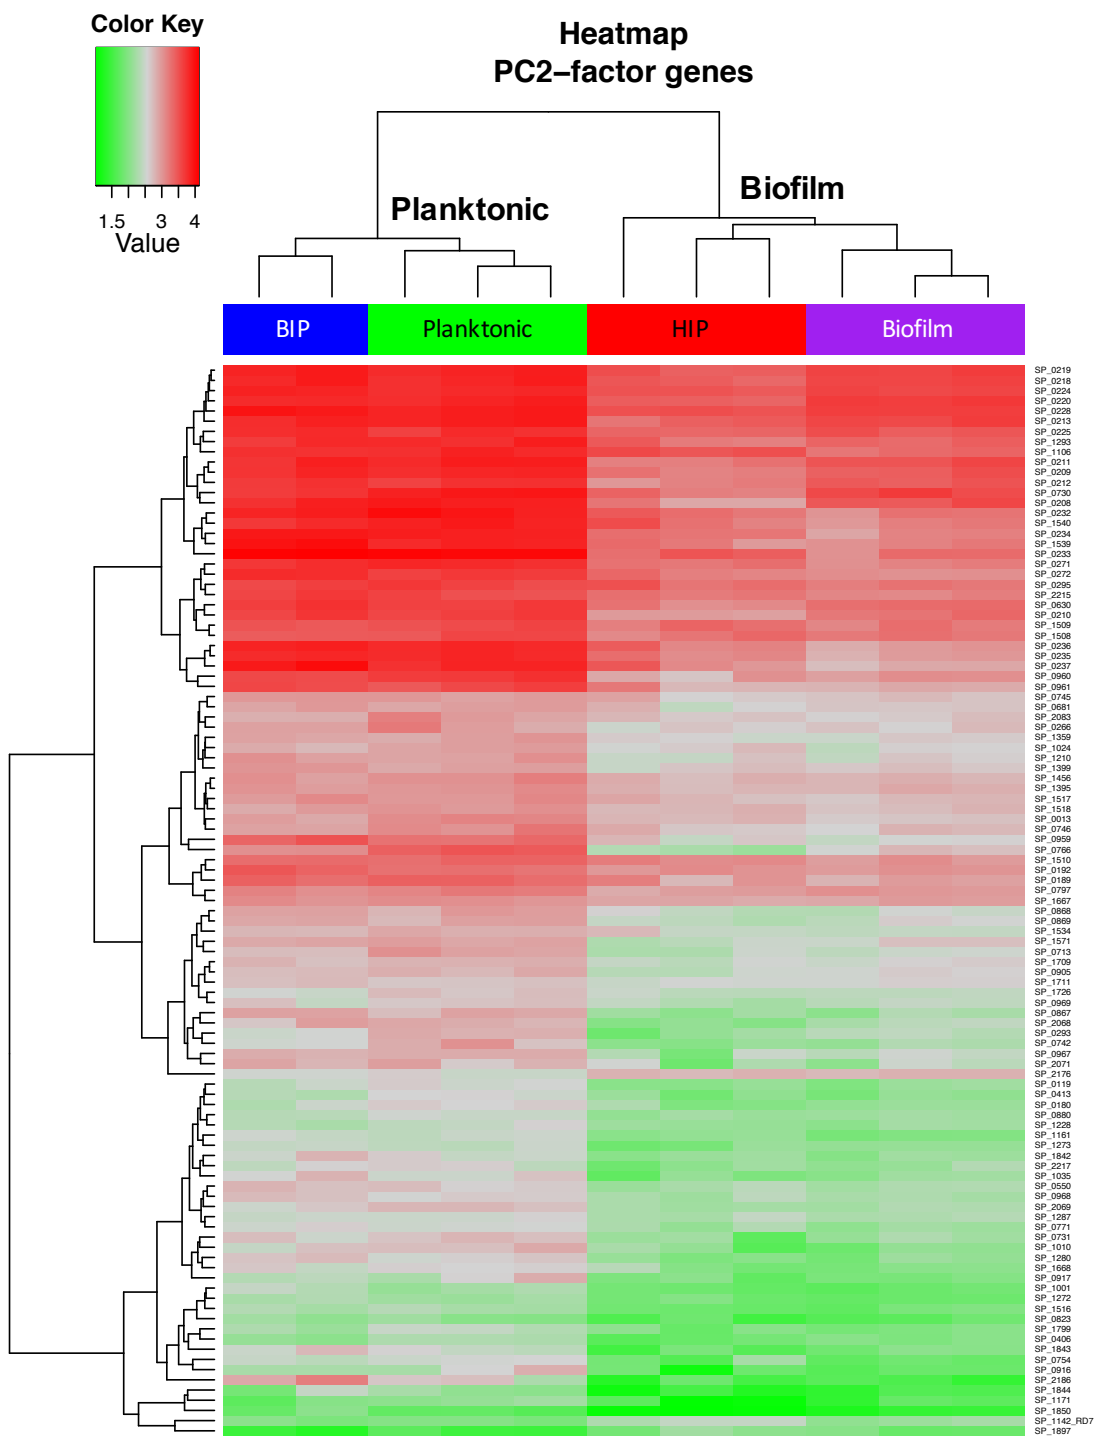

Supplement: ppat.1006582.s008.pdf [file ppat.1006582.s008.pdf]
