# Supplementary material for: Streptococcus pneumoniae in the heart subvert the host response through biofilm-mediated resident macrophage killing
Source: PubMed Central journal article supplement (PMC5589263; doi:10.1371/journal.ppat.1006582), 2017-08-25

**Fig S10**

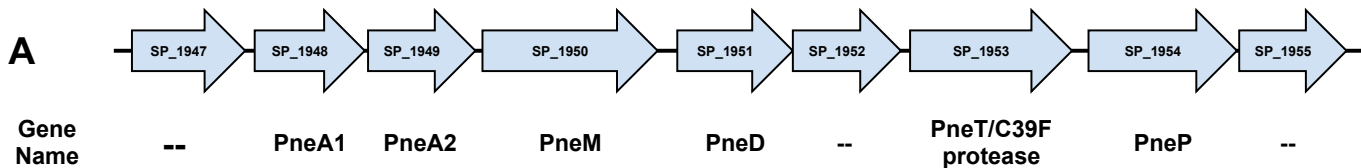

| <u>Gene Name</u>   | <u>Predicted function</u>                                          |
|--------------------|--------------------------------------------------------------------|
| Pne A1/A2          | Pneumococcin A                                                     |
| PneM               | Pneumococcin A modifying protein                                   |
| PneD               | FMN Reductase<br>(Putative Pneumococcin A oxidative decarboxylase) |
| PneT/C39F protease | Pneumococcin A transporter                                         |
| PneP               | Pneumococcin A specific protease                                   |
| --                 | Unknown function                                                   |

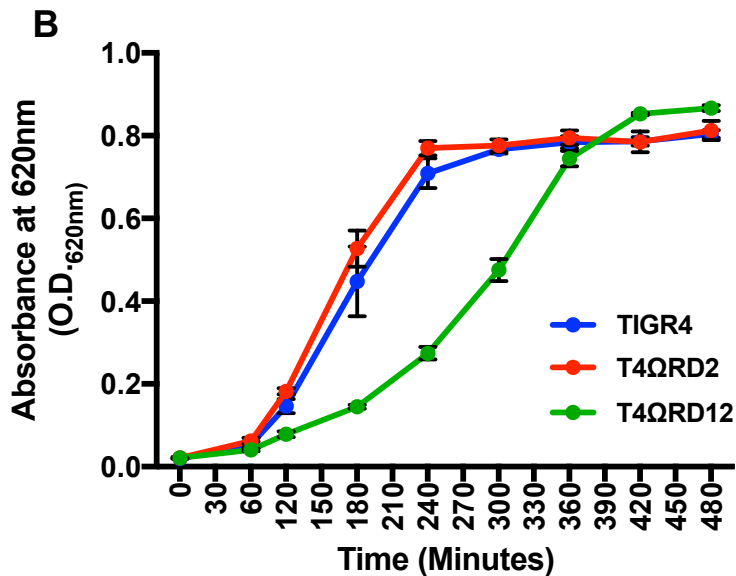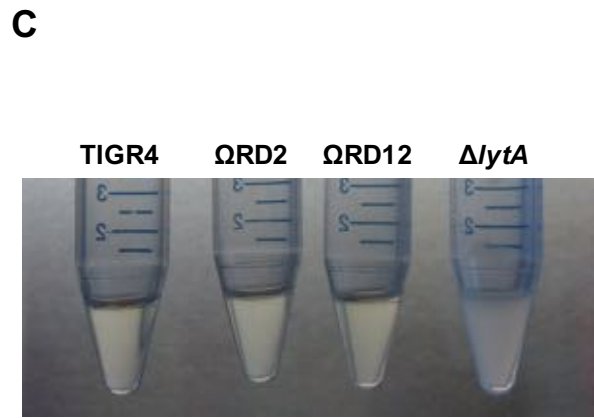

Supplement: ppat.1006582.s010.pdf [file ppat.1006582.s010.pdf]
