# Supplementary material for: Streptococcus pneumoniae in the heart subvert the host response through biofilm-mediated resident macrophage killing
Source: PLoS Pathog. 2017 Aug 25;13(8):e1006582. doi: 10.1371/journal.ppat.1006582 (PMC5589263; doi:10.1371/journal.ppat.1006582)
Supplement: S1 Table — Non-sub-sampled RNA-seq RPKM gene expression values for the four experimental conditions: blood-isolated pneumococci, heart-isolated pneumococci, in vitro biofilm- and planktonic- TIGR4 pneumococci are listed. (XLSX) [file ppat.1006582.s015.xlsx]

## Sheet: All_RPKMs
Table S1: RNA reads-per-kilobase-per-million (RPKM) values of reads mapped to the TIGR4 genome for all genes in each replicate of the four experimental conditions: blood-isolated pneumococci (BIP), heart-isolated pneumococci (HIP), in vitro biofilm- and planktonic- TIGR4 pneumococci tested in RNA-seq.
Gene ID	TIGR4 Gene Annotation	BIP Sample 1	BIP Sample 2	HIP Sample 1	HIP Sample 2	HIP Sample 3	In vitro TIGR4 Biofilm Sample 1	In vitro TIGR4 Biofilm Sample 2	In vitro TIGR4 Biofilm Sample 3	In vitro TIGR4 Planktonic Sample 1	In vitro TIGR4 Planktonic Sample 2	In vitro TIGR4 Planktonic Sample 3
SP_0001	chromosomal replication initiator protein DnaA	315.484	92.1091	84.5609	135.669	145.097	82.6696	123.357	117.851	228.242	278.652	239.061
SP_0002	DNA polymerase III, beta subunit	285.175	192.447	236.354	344.852	286.062	149.928	162.856	164.035	309.024	319.87	302.104
SP_0003	hypothetical protein	185.27	538.976	0	90.4992	49.6039	26.9543	48.7943	68.6636	98.2152	134.673	70.8747
SP_0004	GTP-binding protein	387.388	426.123	670.805	149.421	180.77	126.715	120.432	155.248	341.577	456.098	256.172
SP_0005	peptidyl-tRNA hydrolase	23.1239	189.382	44.9014	197.669	238.36	57.1243	60.4818	79.7421	59.7441	132.662	54.6408
SP_0006	transcription-repair coupling factor	102.141	99.7437	102.083	121.981	138.41	56.946	56.9854	74.0053	74.8709	121.796	72.5529
SP_0007	S4 domain protein	468.974	448.006	742.89	320.713	138.779	112.592	191.829	229.992	236.194	534.448	260.424
SP_0008	hypothetical protein	371.487	300.447	398.819	586.258	423.986	159.69	198.709	251.861	308.228	544.624	320.541
SP_0009	hypothetical protein	235.751	0	364.139	439.694	334.726	277.02	223.757	314.225	519.464	619.983	460.774
SP_0010	conserved domain protein	127.756	52.8783	226.895	166.921	181.686	122.227	130.798	170.328	223.318	327.642	216.362
SP_0011	MesJ/Ycf62 family protein	258.869	231.711	170.225	253.908	173.963	107.988	108.342	131.437	202.363	319.851	191.123
SP_0012	hypoxanthine-guanine phosphoribosyltransferase	769.478	827.431	565.608	556.095	310.869	152.058	183.674	223.258	570.434	711.653	556.278
SP_0013	cell division protein FtsH	923.116	740.173	614.042	669.472	575.851	429.244	478.312	506.909	1421.59	1222.39	1338.84
SP_0014	transcriptional regulator ComX1	0	0	0	0	0	0.280117	0.0857067	0.211547	0.131042	0.463021	0.0726606
SP_0015	IS630-Spn1, transposase Orf1	6.32165	0	0	0	19.7464	2.28393	2.49926	3.13516	7.08947	8.21407	3.79159
SP_0016	IS630-Spn1, transposase Orf2	0	0	169.87	0	60.7245	9.94871	11.3264	13.5165	10.2793	28.3838	16.3583
SP_0018	hypothetical protein	379.689	132.068	0	55.6402	101.657	5.76373	12.4151	14.8344	25.3154	54.3924	23.2992
SP_0019	adenylosuccinate synthetase	1097.88	1267.2	541.904	728.381	479.851	602.912	489.462	509.991	792.992	943.58	777.503
SP_0020	cytidine/deoxycytidylate deaminase family protein	90.1241	0	0	19.2601	61.5809	25.9049	35.8942	52.2087	17.9561	40.1145	12.2219
SP_0021	deoxyuridine 5triphosphate nucleotidohydrolase, putative	65.3095	72.2805	0	71.0541	55.6368	78.8114	103.867	130.216	110.869	126.23	87.7949
SP_0022	conserved hypothetical protein	219.677	107.427	12.4001	209.621	111.705	112.785	132.32	153.765	129.921	142.415	101.116
SP_0024	conserved hypothetical protein	158.803	427.666	346.904	307.697	190.148	157.946	220.868	249.472	404.986	357.842	217.643
SP_0025	hypothetical protein	100.424	347.322	182.813	364.841	333.291	128.054	187.02	226.839	416.938	411.816	220.113
SP_0026	hypothetical protein	261.923	79.4832	123.047	137.228	131.959	152.772	163.37	203.675	378.147	348.963	174.069
SP_0027	ribose-phosphate pyrophosphokinase	546.813	463.669	449.014	260.458	169.954	293.611	270.087	292.943	360.913	474.371	304.26
SP_0029	hypothetical protein	399.926	12.468	1257.81	19.2601	334.296	192.108	151.488	144.503	192.088	302.312	164.002
SP_0030	competence-induced protein Ccs16	576.401	84.7592	361.991	68.9122	276.993	192.124	169.212	162.057	229.403	318.802	193.513
SP_0031	hypothetical protein	502.12	83.3572	91.4063	200.305	130.702	114.786	114.711	109.964	184.108	252.34	159.844
SP_0032	DNA polymerase I	384.31	354.442	189.476	314.83	293.857	441.556	386.98	367.774	410.642	410.119	421.844
SP_0033	conserved hypothetical protein	210.65	273.099	525.899	102.896	169.197	595.691	492.762	367.802	773.414	922.848	637.369
SP_0034	membrane protein	362.435	337.634	199.358	624.095	358.365	488.529	463.179	350.565	700.787	1019.65	623.096
SP_0035	aromatic amino acid aminotransferase	363.876	498.718	339.063	234.973	323.74	147.461	225.129	229.773	151.498	258.744	154.502
SP_0036	conserved hypothetical protein	275.238	264.883	290.461	239.664	453.898	194.055	243.349	248.325	151.417	217.163	135.904
SP_0037	fatty acid/phospholipid synthesis protein PlsX	131.408	255.612	347.952	517.404	381.446	279.26	304.077	321.909	175.284	253.374	158.451
SP_0038	acyl carrier protein, putative	270.372	760.545	820.313	943.744	1266.81	377.895	444.913	488.836	284.664	333.654	225.459
SP_0040	hypothetical protein	920.553	416.786	101.563	679.606	751.538	129.921	209.179	282.869	125.002	165.598	84.2401
SP_0041	bacteriocin BlpU	610.532	0	0	799.919	605.984	169.429	356.124	455.513	242.288	275.733	119.73
SP_0042	competence factor transporting ATP-binding/permease protein ComA	341.449	37.9248	53.4689	25.1079	30.5822	5.79481	6.83743	8.31456	7.29455	8.32118	3.7457
SP_0043	competence factor transport protein ComB	376.869	6.48334	80.573	40.061	12.1989	7.48639	8.56305	10.3047	8.91785	9.06432	4.71056
SP_0044	phosphoribosylaminoimidazole-succinocarboxamide synthase	0	148.348	180.747	337.378	261.682	1.63006	2.07245	2.22304	1.4037	3.21299	1.21511
SP_0045	phosphoribosylformylglycinamidine synthase, putative	173.336	199.668	559.821	797.107	675.138	9.08464	9.52112	7.76354	4.5276	6.48063	5.81285
SP_0046	amidophosphoribosyltransferase	186.338	465.021	966.639	1699.05	1535.01	13.8447	14.9485	12.4465	8.16002	10.6545	10.2641
SP_0047	phosphoribosylformylglycinamide cyclo-ligase	332.415	616.012	243.929	1749	1666.17	17.7545	19.4771	17.0478	10.2805	12.7924	14.2963
SP_0048	phosphoribosylglycinamide formyltransferase	719.383	641.209	902.345	1915	2111.35	14.8985	16.4758	11.7862	9.86128	11.0143	13.7762
SP_0049	vanZ protein, putative	328.224	689.331	125.46	1944.14	1517.68	9.68876	9.81425	10.8262	9.96536	13.3555	16.2076
SP_0050	phosphoribosylaminoimidazolecarboxamide formyltransferase/IMP cyclohydrolase	338.882	687.912	1630.61	1671.15	1667.59	18.4573	17.7437	17.4157	25.8102	30.6654	33.5027
SP_0051	phosphoribosylamine--glycine ligase	68.8775	0	258.369	385.385	358.578	9.11989	10.2495	9.99949	8.99428	12.8872	8.33037
SP_0052	hypothetical protein	135.186	0	355.469	654.843	879.727	27.1019	15.7056	22.6735	20.2141	21.5657	14.0104
SP_0053	phosphoribosylaminoimidazole carboxylase, catalytic subunit	231.807	41.7638	405.627	654.37	378.876	20.3013	19.6021	19.0522	12.7858	18.9553	15.1443
SP_0054	phosphoribosylaminoimidazole carboxylase, ATPase subunit	261.923	280.529	676.758	751.143	780.444	30.2075	31.3316	29.4306	26.6923	31.75	22.8042
SP_0055	hypothetical protein	1352.75	1509.94	855.932	1601.12	2004.39	98.8273	155.595	153.65	234.717	300.806	177.649
SP_0056	adenylosuccinate lyase	669.687	552.506	1110.74	1606.37	1207.56	268.947	278.22	248.111	420.594	474.2	318.02
SP_0057	beta-N-acetylhexosaminidase	16.0617	22.2201	21.117	9.15331	12.5426	15.4772	12.4284	11.8453	15.3905	28.1517	13.6946
SP_0058	transcriptional regulator, GntR family	893.416	443.525	410.5	433.715	493.825	405.947	490.954	461.65	1004.39	1383.83	856.702
SP_0059	hypothetical protein	956.243	371.838	0	88.3698	40.364	48.1143	106.881	91.7118	142.82	299.538	161.506
SP_0060	beta-galactosidase	392.176	336.949	48.3104	413.381	600.99	1588.3	699.382	511	429.276	361.877	445.756
SP_0061	PTS system, IIB component	751.601	501.541	402.418	359.037	794.078	2490.03	900.75	680.037	365.691	298.965	383.892
SP_0062	PTS system, IIC component	322.97	492.691	77.6853	223.851	245.391	2584.75	809.268	637.107	250.698	210.374	297.353
SP_0063	PTS system, IID component	568.577	568.484	141.142	386.618	529.777	2883.92	1076.93	870.718	244.771	234.058	383.406
SP_0064	PTS system, IIA component	445.864	1188.61	213.281	322.713	498.121	3360.02	1194.09	1046.33	260.826	232.386	404.402
SP_0065	sugar isomerase domain protein AgaS	465.332	710	71.2766	135.167	409.243	4170.78	1171.02	1142.11	209.064	158.921	376.993
SP_0066	aldose 1-epimerase	181.583	84.3209	12.3284	60.7862	95.1936	1525.48	633.166	630.447	54.9619	49.8381	167.8
SP_0067	hypothetical protein	363.604	257.098	0	103.606	236.616	1449.87	587.56	617.425	52.1999	43.3781	204.051
SP_0068	hypothetical protein	226.334	375.739	161.577	45.5238	166.348	1882.5	735.865	812.34	55.2759	55.1333	220.536
SP_0069	choline binding protein I	244.547	128.443	0	42.5175	51.7877	1220.45	499.664	572.514	40.7664	38.9328	166.58
SP_0070	hypothetical protein	64.611	0	0	88.3698	0	103.918	36.7026	34.7186	5.67335	7.17763	19.0342
SP_0071	zinc metalloproteinase C, ZmpC	301.421	262.895	379.014	404.493	422.724	155.162	264.135	219.462	235.451	320.282	204.183
SP_0072	hypothetical protein	0	0	0	0	0	6.48693	5.29276	4.56496	16.7734	22.7067	11.8297
SP_0073	conserved hypothetical protein	0	0	0	21.0847	0	19.2118	19.6313	23.7823	23.8506	25.6425	24.108
SP_0074	acetyltransferase, CysE/LacA/LpxA/NodL family	51.9667	0	217.868	64.6145	0	39.618	57.9242	52.8412	108.463	138.35	100.485
SP_0075	phosphorylase, Pnp/Udp family	172.003	82.766	81.6823	76.7125	105.118	88.4932	120.169	138.487	136.81	223.882	126.349
SP_0076	hypothetical protein	566.91	0	378.403	48.4609	132.81	91.8062	90.9781	99.0859	134.458	172.065	116.007
SP_0077	hypothetical protein	381.327	275.236	281.692	368.485	155.363	107.96	119.364	142.655	149.457	225.21	151.719
SP_0078	potassium uptake protein, Trk family	490.931	638.468	426.563	480.079	423.646	243.329	272.532	334.419	467.877	702.684	446.536
SP_0079	potassium uptake protein, Trk family	700.593	963.739	523.596	521.063	568.732	266.238	366.608	432.871	704.463	1068.14	773.353
SP_0080	hypothetical protein	195.269	0	0	0	114.365	13.6946	12.4433	18.6866	29.1205	47.8152	29.8177
SP_0082	cell wall surface anchor family protein	49.1586	19.2687	4490.59	2927.53	5022.44	2273.55	4471.66	2807.1	426.861	716.942	1909.37
SP_0083	DNA-binding response regulator	88.6252	225.386	663.644	844.633	1319.36	211.879	397.404	352.82	274.727	283.466	405.835
SP_0084	sensor histidine kinase	77.6069	180.093	875.001	757.563	805.439	402.209	571.912	504.964	488.005	399.618	614.439
SP_0085	ribosomal protein S4	3919.74	5396.42	3706.29	2253.43	2226.75	2166.92	2193.24	2072.35	4062.3	4049.95	4146.33
SP_0087	hypothetical protein	1046.97	1096.65	453.79	1630.14	1985.56	706.77	513.9	597.463	729.196	914.684	881.244
SP_0088	hypothetical protein	532.108	1280.46	841.277	1702.59	2134.81	1268.91	1032.34	1071.79	1373.37	1854.99	1326.79
SP_0089	hypothetical protein	329.516	1306.8	2299.44	751.143	1200.83	934.775	571.378	659.894	908.646	1106.76	1033.35
SP_0090	ABC transporter, permease protein	631.573	513.602	79.9805	122.061	253.032	29.1555	12.9131	15.4429	198.896	300.541	187.67
SP_0091	ABC transporter, permease protein	691.841	486.25	83.0967	224.367	160.407	83.344	33.6148	34.1223	204.004	306.988	165.188
SP_0092	ABC transporter, substrate-binding protein	859.064	857.856	108.375	195.419	337.515	160.684	51.5541	64.2466	185.973	233.871	109.664
SP_0093	hypothetical protein	219.677	371.086	0	0	0	17.3968	4.57102	6.34641	27.4775	30.0462	10.9118
SP_0094	hypothetical protein	0	0	0	0	0	3.21616	1.26973	1.29279	3.49445	4.11574	1.50703
SP_0095	conserved hypothetical protein	707.775	734.548	855.719	210.046	266.966	164.426	319.055	237.871	1136.83	709.998	1538.2
SP_0096	hypothetical protein	85.7278	3.3885	81.7455	62.8134	38.2543	14.393	16.4366	12.9582	118.071	121.412	126.883
SP_0097	conserved domain protein	188.118	142.451	48.0634	152.345	239.682	273.731	183.884	160.073	742.766	669.463	1031.6
SP_0098	hypothetical protein	26.0144	55.9828	87.698	261.912	112.86	274.269	172.346	143.532	670.232	585.901	857.408
SP_0099	hypothetical protein	97.6344	201.376	59.2449	136.571	110.899	203.684	121.732	94.5551	465.694	402.793	602.246
SP_0100	conserved hypothetical protein	0	267.661	97.8355	192.954	100.725	95.4969	56.6555	47.5107	311.269	266.148	452.371
SP_0101	conserved hypothetical protein	81.3202	22.5	65.7938	239.439	134.062	175.54	138.776	167.922	161.137	391.086	183.56
SP_0102	glycosyl transferase	257.425	202.718	198.262	122.722	177.829	120.495	93.4806	115.463	137.14	238.761	129.4
SP_0103	capsular polysaccharide biosynthesis protein, putative	424.401	348.335	511.599	411.485	378.126	745.636	458.058	472.816	534.071	641.302	548.7
SP_0104	hydrolase, haloacid dehalogenase-like family	143.675	156.706	90.9731	227.835	136.587	301.642	369.884	288.285	414.207	460.775	520.181
SP_0105	L-serine dehydratase, iron-sulfur-dependent, alpha subunit	135.883	73.5224	43.9756	82.5999	122.618	177.696	188.669	155.818	296.834	280.954	337.278
SP_0106	L-serine dehydratase, iron-sulfur-dependent, beta subunit	47.0737	134.587	38.086	134.133	49.0134	106.961	138.947	115.482	240.893	275.789	282.632
SP_0107	LysM domain protein	1564.64	2892.69	5223.22	1923.85	2198.6	2278.9	1508.48	1370.22	1130.02	1979.66	4017.84
SP_0108	hypothetical protein	0	0	0	28.0801	0	6.49244	5.76718	8.65959	8.42588	19.5899	7.96776
SP_0109	bacteriocin, putative	283.75	1306.8	22.2168	938.929	771.961	3012.43	2223.85	1773.56	765.417	809.061	1048.29
SP_0110	hypothetical protein	185.224	180.507	101.27	153.471	217.21	751.047	532.593	480.367	224.226	267.346	251.583
SP_0111	amino acid ABC transporter, ATP-binding protein, putative	353.126	304.474	169.429	91.2604	269.345	594.494	469.619	499.152	344.423	390.781	354.221
SP_0112	amino acid ABC transporter, periplasmic amino acid-binding protein, putative	9.79974	0	0	44.6777	45.9159	46.1378	38.6243	38.2515	22.2138	33.0159	23.0065
SP_0114	hypothetical protein	0	0	0	0	76.9556	6.49244	7.13421	8.10601	7.48532	18.4903	8.32994
SP_0115	hypothetical protein	96.8657	191.437	0	638.767	302.571	387.665	552.482	408.802	164.96	126.618	106.309
SP_0116	hypothetical protein	0	0	0	0	33.4726	4.23592	3.51188	3.76657	8.28442	11.8512	7.84498
SP_0117	pneumococcal surface protein A	1860.03	2139.5	2301.72	3984.59	3544.23	2992.01	3582.02	3320.02	3580.53	3109.78	4198.03
SP_0118	tRNA (5-methylaminomethyl-2-thiouridylate)-methyltransferase	171.513	410.842	205.298	152.639	110.084	219.27	265.584	300.385	546.985	739.237	481.917
SP_0119	MutT/nudix family protein	231.239	319.902	112.253	138.368	108.345	93.8147	147.476	162.39	325.895	430.739	366.439
SP_0120	glucose-inhibited division protein A	174.916	320.102	137.062	202.503	131.215	223.046	216.249	239.85	513.442	513.256	647.965
SP_0121	metallo-beta-lactamase superfamily protein	952.459	1205.21	1740.53	1590.81	1181.22	553.378	552.473	575.831	871.19	1140.28	822.995
SP_0122	conserved hypothetical protein	1227.94	498.718	1162.11	905.224	1302	369.898	460.618	430.254	744.695	1256.79	720.246
SP_0123	competence-induced protein Ccs1	0	0	0	0	0	0.592118	1.28212	1.75429	0.920491	4.19841	1.41777
SP_0124	hypothetical protein	4936.28	276.495	0	0	0	5.34603	7.17023	7.21748	6.5778	12.8172	6.38273
SP_0125	hypothetical protein	3628.22	313.71	172.001	0	44.2701	7.83124	7.66752	8.53012	9.94229	21.2972	9.18805
SP_0126	hypothetical protein	3502.64	243.125	148.112	0	76.243	9.75223	9.77691	8.1093	10.7163	22.1524	9.14985
SP_0127	conserved hypothetical protein	250.509	136.491	154.348	164.724	192.614	114.193	136.649	138.229	167.182	252.793	177.19
SP_0128	ribosomal-protein-alanine acetyltransferase, putative	306.947	259.778	102.258	267.53	639.188	226.319	252.377	251.944	253.611	365.94	262.454
SP_0129	glycoprotease family protein	305.071	528.094	791.103	659.758	1009.94	478.987	448.584	413.916	331.212	401.736	295.483
SP_0133	hypothetical protein	0	0	0	31.9635	43.7992	6.53607	6.07849	7.71921	21.3459	31.1076	17.0263
SP_0134	hypothetical protein	0	0	216.372	0	19.8895	24.4122	30.606	32.8051	51.2925	108.946	49.8164
SP_0135	glycosyl transferase, putative	41.5606	6.57095	50.4382	0	37.0912	13.6273	19.7357	19.7825	34.1701	62.806	29.9283
SP_0136	glycosyl transferase, family 2	54.167	36.6353	0	0	28.1995	3.81164	3.30303	5.04235	13.6715	17.5508	12.6476
SP_0137	ABC transporter, ATP-binding protein	22.8236	19.847	0	5.57435	30.5538	6.09779	6.76749	7.0882	19.5975	22.7433	14.9976
SP_0138	hypothetical protein	0	0	0	0	0	0.5746	0.380918	0.922128	1.04834	3.91089	1.39111
SP_0139	conserved domain protein	0	0	0	0	0	0.815156	0.870671	1.07452	2.67908	8.00667	2.10677
SP_0141	transcriptional regulator	118.992	3.37674	170.329	146.056	114.365	25.1068	27.1246	33.8328	69.2921	97.3706	33.0202
SP_0142	hypothetical protein	259.107	187.019	0	57.7802	35.1891	37.7799	59.4819	75.7772	91.1246	107.717	64.3388
SP_0143	conserved domain protein	27.2167	129.093	28.3117	19.9419	91.0868	28.7554	29.9746	36.4872	56.4432	61.0484	34.2255
SP_0144	hypothetical protein	55.4141	78.8514	67.2509	13.5341	86.5461	18.2707	24.9141	29.8453	58.2724	73.2982	36.3608
SP_0145	conserved hypothetical protein	81.6405	90.3546	0	36.7307	20.1326	18.0901	19.3458	28.8718	61.3623	83.0015	46.1238
SP_0146	conserved hypothetical protein	44.1361	146.541	0	48.0183	81.4652	43.3009	40.4713	47.912	62.23	112.17	58.4824
SP_0147	hypothetical protein	75.318	0	45.7032	236.074	78.4214	70.0026	51.4566	66.8488	83.5674	135.902	74.7366
SP_0148	ABC transporter, substrate-binding protein	409.219	122.879	523.579	216.937	193.222	122.429	148.187	154.742	941.535	758.879	655.641
SP_0149	lipoprotein	225.073	296.869	261.925	52.7118	144.46	44.2815	55.574	59.6785	243.508	291.823	176.86
SP_0150	peptidase, M20/M25/M40 family	68.1096	14.8635	46.568	82.0025	71.9148	30.0994	32.3964	37.1454	87.4102	139.156	60.5822
SP_0151	ABC transporter, ATP-binding protein	150.175	192.302	156.647	250.381	372.169	78.7916	75.1378	94.993	172.899	254.638	111.528
SP_0152	ABC transporter, permease protein, putative	201.609	21.0498	230.824	338.177	314.874	94.5204	100.661	137.057	147.584	239.266	109.547
SP_0153	hypothetical protein	13.8744	133.079	0	94.8813	57.7842	24.6307	25.718	26.3432	68.0205	109.038	58.4956
SP_0154	hypothetical protein	184.315	56.9269	10.404	293.129	180.752	66.0439	70.2154	58.841	173.114	217.042	152.646
SP_0155	sensor histidine kinase, putative	158.456	244.454	101.008	339.314	357.467	123.503	116.973	107.662	209.82	256.343	177.774
SP_0156	DNA-binding response regulator	135.186	272.028	99.4319	399.209	361.488	201.023	170.747	179.258	259.772	312.363	212.532
SP_0157	hypothetical protein	1852.54	1233.17	857.523	634.987	657.891	1093.23	814.655	1139.87	1146.3	1342.69	1094.23
SP_0158	NrdI family protein	573.68	501.736	258.111	325.336	437.062	60.924	107.521	107.687	292.332	327.616	221.456
SP_0159	conserved hypothetical protein	216.025	185.953	151.982	224.808	117.353	19.1979	20.4773	25.466	45.1806	63.5873	34.785
SP_0160	conserved domain protein	11.4864	0	83.6398	9.81887	17.9395	18.4548	14.5197	17.6427	37.5483	63.0321	38.4737
SP_0161	conserved domain protein	0	0	0	30.6589	0	8.8672	10.3548	11.7718	27.1854	45.9797	27.2584
SP_0162	hypothetical protein	0	0	66.6505	93.8929	0	5.13548	4.99955	6.74306	10.3523	16.8866	9.80918
SP_0163	transcriptional regulator PlcR, putative	649.151	434.092	295.199	239.118	455.875	24.9682	43.828	51.3129	64.3222	86.5387	58.1553
SP_0164	hypothetical protein	19791.4	15186.8	24477.8	5450.16	5361.84	8.94638	10.9492	18.99	36.6674	134.08	31.6327
SP_0165	flavoprotein	6854.88	6368.31	8387.92	6073.76	7931.74	4.77906	8.25733	9.7812	23.9652	60.7287	13.2716
SP_0166	pyridoxal-dependent decarboxylase, Orn/Lys/Arg family	1215.67	1536.5	601.118	565.902	777.307	3.24906	4.12507	4.9189	7.55711	19.2737	5.8076
SP_0167	hypothetical protein	1330.37	996.604	160.88	598.972	769.003	2.55164	2.71897	3.9118	5.5851	12.0498	6.02999
SP_0168	macrolide efflux protein, putative	1513.71	1398.12	252.356	821.862	974.281	6.4244	6.83909	8.6449	11.577	24.4949	13.2231
SP_0170	hypothetical protein	2388.29	2792.82	1394.53	3659.42	3342.96	29.3046	28.7154	29.7251	54.5135	104.812	48.5894
SP_0171	ROK family protein	1768.69	1377.71	792.97	2041.57	1618.7	20.1589	24.789	28.8029	43.17	88.2184	39.3982
SP_0172	hypothetical protein	2498.05	666.858	152.344	3004.57	3215.28	14.6195	18.5453	19.3414	28.8742	56.901	27.2373
SP_0173	DNA mismatch repair protein HexB	1478.94	1603.88	892.501	2255.74	2288.7	196.933	211.216	211.983	312.224	451.62	296.074
SP_0174	hypothetical protein	538.564	533.307	997.607	96.9217	531.242	273.973	2537.65	762.115	493.597	473.318	2455.27
SP_0175	riboflavin synthase, beta subunit	276.005	149.615	82.0313	298.531	211.135	134.48	1368.73	511.564	274.449	241.106	1160.58
SP_0176	3,4-dihydroxy-2-butanone 4-phosphate synthase/GTP cyclohydrolase II	168.31	261.269	111.416	175.64	78.5189	127.2	1180.81	410.854	228.579	244.766	1057.99
SP_0177	riboflavin synthase, alpha subunit	140.925	288.998	85.5138	191.329	103.575	125.401	1014.38	348.095	267.642	294.155	1266.41
SP_0178	riboflavin biosynthesis protein RibD	131.687	230.538	127.853	94.1487	194.451	92.6193	716.729	277.063	262.433	314.869	1254.71
SP_0179	Holliday junction DNA helicase RuvA	157.546	270.139	37.7013	159.333	69.3119	84.9972	97.3766	95.2389	299.295	332.979	317.045
SP_0180	DNA-3-methyladenine glycosylase I	201.269	325.978	208.515	100.712	92.0028	129.845	147.83	148.083	374.239	441.238	429.999
SP_0181	conserved hypothetical protein	268.279	316.278	235.931	26.5891	109.304	85.8531	83.4515	96.3194	247.797	276.029	274.747
SP_0182	MccC family protein	127.719	19.7893	105.401	78.608	87.7681	42.6473	59.6492	57.8064	171.622	245.078	196.961
SP_0183	hypothetical protein	54.9194	471.055	366.578	328.625	0	289.688	211.981	240.635	355.386	530.976	332.543
SP_0184	hypothetical protein	205.656	318.649	136.137	268.494	204.396	367.975	305.617	331.706	506.485	696.328	423.406
SP_0185	magnesium transporter, CorA family	142.267	172.889	101.563	214.612	226.551	192.614	190.88	225.368	389.249	591.629	280.641
SP_0186	excinuclease ABC, subunit A	132.179	273.001	180.747	375.572	408.514	189.202	258.006	225.835	212.914	252.746	207.588
SP_0187	peptidase M24 family protein	198.579	326.914	370.531	454.081	476.842	279.548	306.891	318.767	410.711	415.374	363.013
SP_0188		226.764	1050.93	34.4002	775.374	442.701	704.57	690.667	814.251	944.179	828.693	781.172
SP_0189	conserved hypothetical protein	2533.72	2014.47	1547.49	1084.36	588.161	631.647	942.833	864.257	2514.4	2540.16	2054.83
SP_0190	hypothetical protein	1383.97	923.876	1013.09	751.143	343.094	251.359	257.806	242.75	797.155	741.596	522.962
SP_0191	hypothetical protein	342.234	127.961	359.211	569.288	433.381	279.862	330.389	366.043	414.325	689.939	378.61
SP_0192	conserved hypothetical protein	3050.8	2425.79	994.515	1097.18	1264.44	940.481	1139.31	1055.55	1997.3	1938.26	1799.41
SP_0194	conserved hypothetical protein	2093.4	1797.22	5718.87	2503.81	3605.85	1839.03	1820.25	1857.55	3313.65	3175.42	2712.32
SP_0195	hypothetical protein	3634.66	3403.75	15899.2	4734.48	6861.87	1889.86	1769.54	1629.68	4338.84	3302.06	3823.21
SP_0196	hypothetical protein	3432.46	3327.78	16795.9	3239.31	5446.61	1525.12	1401.88	1291.1	3406.18	2505.62	2922.53
SP_0197	dihydrofolate synthetase, putative	496.25	249.539	163.669	129.694	85.5677	188.626	161.663	215.707	198.173	239.18	150.883
SP_0198	hypothetical protein	516.888	127.124	209.099	98.1887	179.395	257.635	330.637	374.203	774.262	816.199	1130.6
SP_0199	cardiolipin synthetase	125.794	273.324	6.7352	63.2542	17.3353	37.8286	52.6678	64.6933	87.9102	107.368	118.492
SP_0200	competence-induced protein Ccs4	289.852	189.097	83.9302	159.966	149.309	100.713	115.82	134.078	182.595	246.743	168.913
SP_0201	hypothetical protein	157.97	0	47.9284	16.8796	92.5196	59.6325	50.3326	73.9226	110.77	110.366	105.894
SP_0202	anaerobic ribonucleoside-triphosphate reductase	352.797	240.482	1695.24	1796.21	2054.83	811.944	739.096	771.939	566.985	1342.36	408.4
SP_0203	hypothetical protein	579.575	537.979	2268.95	1789.96	1927.16	705.26	939.685	1023.8	784.156	1612.12	576.667
SP_0204	acetyltransferase, GNAT family	142.985	161.124	593.15	1262.28	1339.89	325.555	384.074	460.521	315.89	647.308	174.615
SP_0205	anaerobic ribonucleoside-triphosphate reductase activating protein	269.858	66.6434	860.704	1372.65	1832.15	419.749	421.485	493.882	368.716	740.325	194.529
SP_0206	hypothetical protein	147.902	293.676	496.249	1576.66	2119.71	349.453	357.128	396.368	321.435	645.565	179.91
SP_0207	conserved domain protein	217.733	481.947	943.723	1223.1	1590.98	493.667	397.315	536.356	389.425	787.073	203.947
SP_0208	ribosomal protein S10	5592.18	7624.22	1801.5	787.607	786.118	2959.05	2850.54	3952.52	7676.1	8385.72	7416.82
SP_0209	ribosomal protein L3	5379.47	6879.63	1923.62	1574.17	1411.77	2513.21	2612.37	3530.91	6790.75	5857.78	6921.83
SP_0210	ribosomal protein L4	3979.54	5213.16	974.122	888.371	943.508	1711.1	1853	2267.03	4413.4	3889.69	5046.22
SP_0211	ribosomal protein L23	5205.69	7588.45	1486.51	1942.35	1538.72	3095.32	3088.21	4004.69	8050.5	6314.91	7882.57
SP_0212	ribosomal protein L2	4750.72	5632.11	1020.38	1653.6	1441.49	2905.66	2561.3	3160.79	5587.75	4237.52	5709.89
SP_0213	ribosomal protein S19	6015.42	7464.46	1781.13	2796.81	2540.35	3929.47	3744.54	4600.56	7773.97	6911.54	8426.94
SP_0214	ribosomal protein L22	5318.11	7767.32	1678.43	2926.19	2625.41	4746.4	4322.64	4784.82	7685.05	6260.02	7736.58
SP_0215	ribosomal protein S3	5574.57	7122.01	2152.38	2377.47	2027.09	4518.3	3624.95	4149.04	6833.46	4999.53	6365.58
SP_0216	ribosomal protein L16	7093.35	7681.35	1530.06	2677.99	2376.79	5408.43	5091.95	6267.83	8202.73	6938.54	8637.05
SP_0217	ribosomal protein L29	6278.32	7850.48	1839.17	3113.43	3580.11	4409.67	3983.15	5139.55	7194.26	5503.45	7247.58
SP_0218	ribosomal protein S17	6459.02	8260.67	3015.36	2210.26	2697.43	3918.47	3913.27	4371.73	6739.33	5755.91	8109.43
SP_0219	ribosomal protein L14	7208.28	8210.91	3476.66	2625.95	2510.44	4078.45	3984.82	4623.18	7096.16	6119.69	7745.33
SP_0220	ribosomal protein L24	6250.04	6464.27	2707.84	2341.8	2583.29	4742.22	4531.36	5045.35	6989.28	5917.27	7803.39
SP_0221	ribosomal protein L5	7233.58	7500.61	1855.9	1859.18	2032.02	3293.93	3253	3535.87	4981.07	4153.46	5612.96
SP_0222	ribosomal protein S14	6419.46	7580.1	1469.27	2320.2	2546.52	3886.58	3646.56	4265.44	5456.71	4814.06	6449.33
SP_0223	hypothetical protein	6922.52	9143.88	858.328	3077.86	3380.73	3079.29	1963.42	2334.55	4923.3	3195.36	4451.03
SP_0224	ribosomal protein S8	7234.49	6920.84	3239.31	2812.55	3178.13	4098.16	3777.59	4066.06	6320.89	5776.27	6690.78
SP_0225	ribosomal protein L6	5880.97	6275.07	2317.5	2324.77	2223.4	3501.31	2642.61	3029.19	6333.36	4312.27	5654.2
SP_0226	ribosomal protein L18	7232.74	8033.35	1702.67	2247.12	2433.37	4629.23	3784.96	3880.91	6230.33	4684.21	6224.24
SP_0227	ribosomal protein S5	7165.48	7653.29	1887.22	2412.76	2553.45	5357.22	4845.86	5171.05	6416.86	5145.93	6574.79
SP_0228	ribosomal protein L30	9284.07	8330.03	3339.08	3152.34	3532.18	4537.53	4387.88	4519.89	7926.04	6936.97	8441.27
SP_0229	ribosomal protein L15	5935.78	5964.01	1958.71	2084.81	2268.62	2658.48	2262.9	2513.24	4063.67	3219.59	4106.66
SP_0230	preprotein translocase, SecY subunit	4223.64	3895.57	2081.57	1722.3	1419.48	2486.29	1858.48	2178.22	3413.27	2509.64	3185.06
SP_0231	adenylate kinase	775.575	853.792	1051.39	282.12	193.292	139.489	205.331	198.477	789.196	849.821	936.496
SP_0232	translation initiation factor IF-1	6933.38	7906.56	2892.45	1728.66	2067.96	1076.32	1941.87	1853.96	9102.66	10766	7319.67
SP_0233	ribosomal protein L36	12189.3	13054	1996.1	2657.89	3131.83	1126.22	2159.28	2137.93	11223.3	12029.9	11098.1
SP_0234	ribosomal protein S13	8520.61	8573.15	2001.7	1760.88	1777.34	808.911	1432.72	1483.5	7523.48	7813.9	7299.95
SP_0235	ribosomal protein S11	6209.32	6837.89	2074.5	1337.97	1222.27	662.419	955.593	1006.07	6998.86	6107.62	6351.62
SP_0236	DNA-directed RNA polymerase, alpha subunit	7093.05	7714.55	2734.38	1439.69	1328.39	712.312	980.308	1080.46	6964.19	6371.46	6544.99
SP_0237	ribosomal protein L17	8439.7	10708.8	2951.22	1013.17	1276.63	538.752	757.053	782.789	7137.76	5672.33	7089.24
SP_0238	ACT domain protein	444.292	590.057	215.678	641.426	1094.82	118.09	167.279	145.658	235.251	242.228	222.238
SP_0239	conserved hypothetical protein	569.388	392.489	341.92	825.247	920.045	259.475	330.743	302.37	298.066	304.639	266.366
SP_0240	phosphoglycerate mutase family protein	437.453	252.598	535.512	507.266	415.871	480.492	521.057	607.607	562.834	609.91	466.152
SP_0242	iron ABC transporter, ATP-binding protein	21.7263	0	0	0	0	5.01749	4.01848	5.06783	4.9076	9.86501	4.58853
SP_0243	iron ABC transporter, iron-binding protein	20.7365	34.4248	0	0	8.09661	3.87812	2.87206	4.49303	3.58723	9.20418	3.02931
SP_0244	hypothetical protein	48.8172	0	0	0	0	4.66862	5.45983	6.69899	13.6284	15.6156	13.9939
SP_0245	pyruvate formate-lyase-activating enzyme, putative	27.1416	0	131.757	0	84.7799	19.2513	25.9789	21.4814	26.9896	23.2194	22.2938
SP_0246	transcriptional regulator, DeoR family	42.3475	0	0	36.1997	0	16.0646	19.2387	25.5386	37.6054	40.9707	25.617
SP_0247	transcriptional regulator	48.3694	71.3762	0	32.159	8.39373	14.4028	17.2077	23.1602	35.9063	37.3016	25.3608
SP_0248	PTS system, IIA component	57.4857	0	0	28.0801	25.6519	60.631	68.5653	52.1157	47.4985	48.6287	36.6879
SP_0249	PTS system, IIB component	0	0	0	29.1706	79.9442	128.364	105.178	79.6074	63.633	61.9829	52.2968
SP_0250	PTS system, IIC component	45.8284	0	53.1995	13.6262	31.1196	168.468	127.875	97.4843	49.3027	52.9266	46.494
SP_0251	formate acetyltransferase, putative	10.8082	35.8856	0	40.6523	40.5129	161	119.032	96.2656	63.4005	63.4702	63.6339
SP_0252	transaldolase family protein	23.6424	30.5269	86.0777	26.9468	24.6166	156.631	120.814	106.855	57.4282	67.9472	65.9832
SP_0253	glycerol dehydrogenase	79.8827	42.865	17.6266	45.5238	120.981	169.346	135.015	128.618	71.1252	70.95	78.8711
SP_0254	leucyl-tRNA synthetase	342.423	387.135	409.173	358.459	236.957	294.175	337.74	348.124	495.639	677.655	461.236
SP_0255	acetyltransferase, GNAT family	106.051	71.2608	0	84.1798	65.0695	41.7761	59.8764	58.5949	71.1061	94.6516	82.7161
SP_0256	acetyltransferase, GNAT family	139.076	76.9605	184.128	118.886	187.591	94.8771	105.627	97.9508	102.481	124.81	124.649
SP_0258	hypothetical protein	141.727	0	9425.66	387.687	88.5403	114.697	133.002	96.7657	184.507	291.835	90.2554
SP_0259	Holliday junction DNA helicase RuvB	179.436	137.26	57.6436	103.762	82.4249	87.0018	110.597	106.04	143.556	153.729	131.118
SP_0260	conserved hypothetical protein	124.216	404.784	524.829	259.557	215.556	116.408	105.445	108.432	137.612	140.432	124.697
SP_0261	undecaprenyl diphosphate synthase	606.067	492.016	370.924	433.466	537.016	330.132	340.586	418.562	385.025	590.858	313.434
SP_0262	phosphatidate cytidylyltransferase	701.656	515.28	612.786	751.143	665.704	436.816	341.974	445.354	367.7	458.728	293.896
SP_0263	eep protein	653.802	639.072	446.875	708.221	513.007	633.608	495.51	632.797	565.133	619.187	483.924
SP_0264	prolyl-tRNA synthetase	563.057	767.142	438.297	889.704	803.883	880.487	729.714	869.314	876.151	857.417	791.281
SP_0265	glycosyl hydrolase, family 1	101.243	44.3968	55.6386	271.065	101.436	96.5227	63.5968	77.0859	63.1828	76.8307	48.6931
SP_0266	glucosamine--fructose-6-phosphate aminotransferase, isomerizing	852.48	867.671	332.479	398.617	484.769	492.883	387.438	574.264	928.162	1677.24	718.332
SP_0267	oxidoreductase, putative	30.1272	150.043	79.2188	25.7535	66.6582	127.68	191.369	186.524	233.45	318.932	301.98
SP_0268	alkaline amylopullulanase, putative	56.2484	141.965	19.9795	199.367	182.126	261.591	154.191	133.696	227.338	191.936	279.28
SP_0269	hypothetical protein	0	0	0	0	0	1.05044	1.14276	0.396651	0.131042	1.49801	0.726606
SP_0270	hypothetical protein	8149.33	11419	3887.23	1938.43	664.052	445.296	812.905	817.117	4442.38	4915.79	4479.64
SP_0271	ribosomal protein S12	5097.15	6025.28	1862.35	2046.59	1700.55	1138.12	1401.75	1588.66	6401.39	6855.87	5816.86
SP_0272	ribosomal protein S7	6142.57	6076.58	2275.46	1387.46	1529.72	1194.76	1128.52	1169.06	5003.17	4320.15	4691.97
SP_0273	translation elongation factor G	2682.98	3070.24	2790.48	1950.37	1823.24	1842.42	1672.4	1452.05	4058.41	3530.14	3913.72
SP_0274	DNA polymerase III, alpha subunit, Gram-positive type	115.841	120.898	78.6694	293.479	210.918	337.664	324.914	315.751	214.969	225.643	192.93
SP_0275	conserved hypothetical protein	629.076	519.404	96.9461	256.072	109.166	268.531	323.815	323.907	235.59	217.05	177.952
SP_0276	conserved hypothetical protein	415.734	481.022	45.867	161.536	221.351	400.638	458.478	463.584	314.726	293.616	214.221
SP_0277	hypothetical protein	723.643	572.059	0	147.283	215.274	417.21	318.717	350.919	296.001	204.477	184.111
SP_0278	aminopeptidase PepS	523.193	280.71	314.255	362.871	331.491	489.389	494.719	492.7	379.265	327.017	323.722
SP_0279	conserved hypothetical protein	1089.83	644.124	512.429	682.857	588.161	762.889	801.175	782.999	676	552.994	599.755
SP_0280	ribosomal small subunit pseudouridine synthase A	69.2759	84.7407	429.218	436.349	273.336	169.946	141.227	160.372	165.507	161.24	147.259
SP_0281	aminopeptidase C	724.689	474.231	1447.44	945.259	727.821	2535.71	2342.3	1877.03	1809.29	1707.38	1738.86
SP_0282	PTS system, mannose-specific IID component	3276.37	3952.38	1981.97	3498.75	3385.79	1747.77	1450.05	1221.96	2422.22	2589.76	1981.61
SP_0283	PTS system, mannose-specific IIC component	2442.68	2200.83	879.388	3010.18	2391.41	906.423	788.74	679.918	1774.11	1593.48	1359.74
SP_0284	PTS system, mannose-specific IIAB components	2002.83	2641.52	1498.73	2296.29	1974.08	415.729	461.838	387.061	1219.45	1093.36	1015.33
SP_0285	alcohol dehydrogenase, zinc-containing	852.866	474.809	755.895	2872.02	2078.74	5914.15	5371.11	2991.1	1911.92	2554.97	2833.38
SP_0286	Cof family protein	178.336	488.045	255.78	227.283	121.539	36.081	64.4497	60.9505	170.504	301.222	162.845
SP_0287	xanthine/uracil permease family protein	408.931	85.1681	425.694	195.817	374.538	23.3602	26.1786	31.676	84.4818	93.849	73.8819
SP_0288	conserved hypothetical protein	342.355	164.188	323.154	91.0477	267.346	10.4286	12.2685	15.0372	32.7299	45.7102	32.3775
SP_0289	dihydropteroate synthase	248.27	277.857	365.625	233.689	209.124	99.0518	131.5	113.55	197.3	236.237	191.867
SP_0290	dihydrofolate synthetase	184.31	123.492	241.816	456.477	323.644	173.711	208.629	212.621	211.018	242.883	202.233
SP_0291	GTP cyclohydrolase I	510.602	194.5	299.747	609.035	408.003	214.767	260.869	279.471	243.826	286.746	227.968
SP_0292	bifunctional folate synthesis protein	405.309	394.742	188.884	365.871	258.27	153.599	168.554	174.468	142.899	170.889	124.965
SP_0293	hypothetical protein	318.887	368.609	68.8005	169.613	132.81	242.557	266.446	222.773	665.288	751.517	674.946
SP_0294	ribosomal protein L13	4661.88	4807.02	3320.89	3155.81	2118.43	1225.37	1633.39	1546.85	5020.42	6547.41	3650.68
SP_0295	ribosomal protein S9	3756.32	4435.64	3337.61	2087.15	1780.94	1562.93	1905.63	1713.47	4254.77	5108.33	3502.94
SP_0296	hypothetical protein	0	0	0	0	0	1.18838	1.35053	0.384631	0.0953033	1.08946	0.616514
SP_0297	hypothetical protein	0	0	0	0	0	0.298792	1.00562	1.01543	0.922536	0.871569	1.55009
SP_0298	conserved hypothetical protein	6.54126	0	15.877	78.2829	108.973	167.857	151.048	139.359	114.719	137.872	147.48
SP_0299	IS630-Spn1, transposase Orf1	0	0	0	0	0	7.30881	7.44761	7.62299	19.4484	23.2919	15.7348
SP_0300	IS630-Spn1, transposase Orf2	0	51.6372	18.8745	0	0	7.17232	4.04515	3.36977	6.34568	8.3686	6.3787
SP_0302	conserved domain protein	0	7.97132	0	0	0	1.74499	1.46123	1.52591	1.23738	2.89332	1.39762
SP_0303	6-phospho-beta-glucosidase	0	0	31.1685	6.27259	5.73017	6.83821	6.22193	6.22717	3.91321	5.52236	4.03704
SP_0304	conserved hypothetical protein	0	0	0	0	0	2.381	3.08544	2.53856	1.88701	2.66918	2.13138
SP_0305	PTS system, IIB component	0	0	0	28.615	52.2809	6.72281	4.30982	2.78033	10.3835	8.96471	10.7768
SP_0306	transcriptional regulator, putative	0	0	0	6.08213	5.55617	5.39821	5.29276	4.1196	9.01484	9.29791	10.2529
SP_0307	PTS system, IIA component	0	0	0	0	0	6.16483	4.84638	4.23094	10.0792	10.6846	9.85149
SP_0308	PTS system, IIA component	0	0	0	0	0	5.51342	5.44169	4.79506	10.8628	12.368	9.30055
SP_0309	hypothetical protein	0	0	0	0	0	2.9835	2.65065	3.00422	4.19335	5.05407	6.60394
SP_0310	PTS system, IIC component	0	0	0	6.6917	6.11303	10.1815	8.97916	7.56669	10.2639	12.365	11.9537
SP_0311	hypothetical protein	342.548	1005.47	0	305.55	46.5212	194.721	451.756	440.018	1204.56	1807.77	1188.12
SP_0312	glycosyl hydrolase, family 31	74.9488	24.3125	37.6379	159.066	108.983	179.028	222.972	204.342	284.938	255.581	295.794
SP_0313	glutathione peroxidase	71.8442	146.793	107.311	113.38	155.363	56.2349	69.0253	69.4779	133.343	195.582	168.463
SP_0314	hyaluronidase	28.8237	29.1659	7.99556	16.8954	23.1516	6.87123	7.40703	7.12955	12.8787	12.8489	13.1692
SP_0316	hypothetical protein	0	0	0	0	0	29.4642	27.2992	28.6764	14.2108	23.605	21.0985
SP_0317	4-hydroxy-2-oxoglutarate aldolase/2-deydro-3-deoxyphosphogluconate aldolase	0	0	0	28.615	0	50.6523	38.3966	43.0145	14.3173	22.9928	21.7751
SP_0318	carbohydrate kinase, PfkB family	0	0	0	40.4808	4.10891	42.4257	29.5474	31.1873	11.7891	15.7613	14.886
SP_0319	conserved domain protein	8.21224	0	0	21.0601	12.8259	37.7853	29.8398	34.1243	10.1698	15.619	14.3601
SP_0320	oxidoreductase, short chain dehydrogenase/reductase family	0	0	0	0	20.182	30.0851	22.2501	25.4323	11.4392	12.5769	11.2553
SP_0321	PTS system, IIA component	42.4205	0	0	0	0	6.46524	5.26456	10.7378	6.56476	8.23482	7.21595
SP_0322	glucuronyl hydrolase	2.21338	0	0	22.7046	0	14.4974	9.34929	12.906	7.82688	11.2075	8.00426
SP_0323	PTS system, IIB component	0	11.8598	26.0099	36.6411	0	21.544	14.1311	19.9164	9.23048	15.8105	12.2637
SP_0324	PTS system, IIC component	0	0	0	23.1121	5.27836	24.1619	12.1835	19.56	8.01574	13.1741	8.86832
SP_0325	PTS system, IID component	0	0	7.81251	33.0173	10.054	42.0005	23.5416	36.1412	12.6568	24.5029	15.5293
SP_0326	preprotein translocase, YajC subunit	0	0	10.8817	61.3178	0	30.6033	12.0339	21.4137	7.78764	13.6961	8.50178
SP_0327	hypothetical protein, interruption	0	0	9.74778	0	5.01782	3.35936	2.85793	3.78232	2.74446	8.79536	3.1101
SP_0328	IS1380-Spn1, transposase	95.8948	34.6548	21.3756	13.3834	12.2261	41.5247	34.5321	36.8817	32.0618	40.8026	29.8971
SP_0329	hypothetical protein, interruption	0	0	0	0	37.4284	8.11491	8.80961	10.5773	18.222	25.3547	21.6308
SP_0330	sugar binding transcriptional regulator RegR	184.161	87.3504	223.499	134.936	189.01	279.815	276.109	261.394	1021.61	787.348	1148.65
SP_0332	hypothetical protein	12.1369	0	0	165.999	15.1644	50.2663	60.888	54.1841	78.8395	93.6816	71.0388
SP_0333	transcriptional regulator, putative	40.5558	0	98.4376	277.345	0	20.4557	42.405	37.2323	74.1255	114.779	68.6214
SP_0334	yllC protein	202.353	217.816	222.028	99.5206	121.219	102.515	113.958	133.335	91.7245	147.837	86.6609
SP_0335	cell division protein FtsL	207.243	256.887	70.4231	255.105	142.416	204.327	238.728	273.933	163.343	258.141	172.484
SP_0336	penicillin-binding protein 2X	239.276	366.468	286.837	400.076	447.712	387.753	408.349	454.468	375.229	402.28	367.296
SP_0337	phospho-N-acetylmuramoyl-pentapeptide-transferase	424.575	457.997	293.507	326.185	562.38	315.148	337.193	388.198	296.407	272.199	292.147
SP_0338	ATP-dependent Clp protease, ATP-binding subunit, putative	11.2655	18.0093	69.8785	162.641	185.72	8756.24	5271.61	5410.94	144.402	430.173	4296.02
SP_0340	autoinducer-2 production protein	196.482	30.2019	662.365	214.612	196.054	520.241	464.967	439.834	741.259	811.858	887.933
SP_0341	hypothetical protein	188.168	194.5	168.04	370.261	282.792	646.99	601.657	565.365	550.506	704.791	670.415
SP_0342	glucan 1,6-alpha-glucosidase	498.373	792.878	270.581	801.593	599.134	895.4	850.21	828.333	989.129	864.455	1413.35
SP_0343	IS1380-Spn1, transposase	3.91408	0	9.50029	6.6917	12.2261	10.7139	10.5877	8.70688	10.983	14.2382	15.3024
SP_0344	IS630-Spn1, transposase Orf2	194.405	94.6682	0	106.357	121.449	53.4784	62.6999	72.1881	81.0466	152.1	106.243
SP_0345	IS630-Spn1, transposase Orf1	60.6007	234.742	128.704	414.424	473.233	104.094	157.267	165.773	301.162	536.052	366.51
SP_0346	capsular polysaccharide biosynthesis protein Cps4A	2022.67	2448.4	1185.88	1062.82	1059.18	379.154	461.256	536.487	558.167	947.876	497.051
SP_0347	capsular polysaccharide biosynthesis protein Cps4B	1993.3	2212.04	729.877	1194.44	1428.62	605.268	688.519	842.98	727.803	970.656	574.408
SP_0348	capsular polysaccharide biosynthesis protein Cps4C	1804.97	2113.4	992.544	1749.42	1348.61	465.148	643.109	741.257	674.893	826.142	514.164
SP_0349	capsular polysaccharide biosynthesis protein Cps4D	2736.33	2838.59	1318.98	1528.64	1637.22	627.807	774.227	894.714	832.508	913.599	616.434
SP_0350	capsular polysaccharide biosynthesis protein Cps4E	2149.11	1158.28	472.841	1984.15	1417.69	387.319	547.143	645.098	818.138	872.494	745.068
SP_0351	capsular polysaccharide biosynthesis protein Cps4F	1962.09	2107.48	684.061	1535.26	1563.17	487.231	584.121	705.05	887.67	936.852	815.207
SP_0352	capsular polysaccharide biosynthesis protein Cps4G	1637.48	1577.94	600.04	1297.24	1831.11	286.63	261.032	338.581	591.11	559.758	533.443
SP_0353	capsular polysaccharide biosynthesis protein Cps4H	2388.77	2681.55	1406.63	1752	2380.5	406.433	453.61	583.337	749.934	837.349	733.769
SP_0354	hypothetical protein	1453.54	1929.38	472.69	1093.74	1099.08	238.306	278.783	350.099	459.706	449.856	381.972
SP_0355	hypothetical protein	1958.23	2304.64	623.302	1523.09	1573.86	313.659	346.347	411.866	627.364	588.949	586.856
SP_0356	O-antigen transporter RfbX, putative	1783.95	2279.74	700.635	1607.52	2015.47	299.847	300.892	388.04	559.761	457.7	532.657
SP_0357	UDP-N-acetylglucosamine-2-epimerase	2475.27	3551.22	1343.21	2442.24	2786	626.238	695.083	807.034	1200.76	1047.53	971.148
SP_0358	capsular polysaccharide biosynthesis protein cps4J	2194.28	2309.69	1078.53	2022.97	2471.83	572.957	639.813	723.346	1067.52	908.722	867.743
SP_0359	capsular polysaccharide biosynthesis protein Cps4K	1907.44	2388.56	634.642	2110.53	2179.06	597.511	801.545	823.434	1216.33	1079.18	983.694
SP_0360	UDP-N-acetylglucosamine 2-epimerase	2993.18	3796.45	1255.39	2700.31	3463.94	1017.28	1212.4	1204.03	1828.17	1635.78	1446.25
SP_0366	oligopeptide ABC transporter, oligopeptide-binding protein AliA	1015.43	641.968	457.492	127.082	143.042	146.631	133.858	179.962	472.233	373.247	387.418
SP_0367	hypothetical protein	0	72.9375	0	0	0	4.66862	5.25667	5.07713	21.2812	19.6103	45.7277
SP_0368	cell wall surface anchor family protein, authentic frameshift	158.049	120.462	73.5869	124.058	170.771	268.701	157.876	153.838	101.705	89.4418	206.989
SP_0369	penicillin-binding protein 1A	875.659	688.855	276.97	561.271	545.138	780.37	767.811	896.236	839.98	938.419	1028.93
SP_0370	recombination protein U	825.722	933.405	434.065	294.418	282.751	169.29	206.959	227.939	641.919	729.534	535.424
SP_0371	conserved hypothetical protein	0	0	0	0	15.5952	10.95	13.3495	17.4045	51.7974	93.8175	45.556
SP_0372	conserved hypothetical protein	726.933	1582.52	533.204	546.286	623.807	379.092	536.721	528.944	1248.59	1064.78	871.081
SP_0373	conserved hypothetical protein	213.986	314.929	171.288	276.327	220.433	273.46	243.721	316.553	327.505	392.161	307.468
SP_0374	hypothetical protein	342.035	345.081	165.121	335.995	348.259	318.189	302.051	361.641	487.204	522.585	556.766
SP_0375	6-phosphogluconate dehydrogenase, decarboxylating	983.23	1322.6	1416.64	1685.72	1320.37	1386.27	1347.55	1198.49	2462.83	2110.77	2556.42
SP_0376	DNA-binding response regulator	926.466	1312.88	1747.98	1567.6	2303.2	1864.75	2028.08	1726.24	2727.08	2690.04	3042.12
SP_0377	choline binding protein C	61.8447	48.4824	100.073	83.7051	80.4912	117.94	131.407	130.65	124.989	124.895	117.359
SP_0378	choline binding protein J	163.604	160.623	115.287	90.2274	107.152	144.562	180.15	180.126	162.332	157.563	156.848
SP_0379	conserved hypothetical protein	8.55192	82.8164	0	14.6208	0	23.0909	28.2714	27.7533	35.5873	45.7097	49.3408
SP_0380	hypothetical protein	18.0557	0	43.825	25.7241	0	16.564	18.9572	18.8943	22.7905	35.4	31.0417
SP_0381	mevalonate kinase	167.945	311.997	203.818	41.0181	46.8387	52.0081	70.8118	66.381	70.8289	99.7842	79.4753
SP_0382	mevalonate diphosphate decarboxylase	118.819	284.411	171.028	203.139	181.257	158.31	186.032	163.184	170.068	196.254	166.927
SP_0383	phosphomevalonate kinase	198.756	147.612	123.779	330.861	265.489	191.436	258.875	248.517	239.121	277.605	235.709
SP_0384	FMN-dependent dehydrogenase family protein	302.464	326.091	281.633	329.879	293.208	207.647	230.613	222.658	269.245	258.484	240.943
SP_0385	conserved hypothetical protein	26.399	41.7382	192.228	116.056	47.1202	81.7349	108.351	96.9666	128.698	160.81	135.251
SP_0386	sensor histidine kinase, putative	68.8146	146.461	144.543	49.7746	70.2722	146.156	167.944	147.764	115.393	158.497	122.35
SP_0387	DNA-binding response regulator	64.5498	59.9171	131.406	156.637	188.62	161.078	185.267	157.347	119.163	125.655	125.642
SP_0389	hypothetical protein	153.774	133.719	0	187.786	154.392	123.065	201.925	193.513	104.991	140.377	128.851
SP_0390	choline binding protein G	75.2741	132.614	7.45739	199.604	177.545	152.086	242.088	223.559	105.64	124.244	101.406
SP_0391	choline binding protein F	237.071	282.339	143.856	334.82	221.351	290.303	322.894	285.123	227.08	212.589	203.569
SP_0394	PTS system, mannitol-specific IIBC components	14.8934	16.4831	0	0	4.65212	2.99425	1.88264	2.56725	4.57714	4.84533	2.37768
SP_0395	transcriptional regulator, putative	5.39086	0	3.27119	0	0	1.20869	0.918411	0.947419	1.44066	1.51723	1.18278
SP_0396	PTS system, mannitol-specific IIA component	48.1485	0	29.2166	0	0	0.793026	0.751401	0.985287	1.55096	1.61181	0.902451
SP_0397	mannitol-1-phosphate 5-dehydrogenase	6.95549	0	0	0	0	0.87706	0.711584	1.09402	1.44942	1.69025	1.27811
SP_0398	hypothetical protein	33.1589	0	0	0	0	0.845637	1.12119	0.558803	0.791197	2.05559	1.16988
SP_0400	trigger factor	2383.6	2167.68	2810.53	1207.45	955.532	394.25	544.486	494.476	1338.83	1488.08	1345.88
SP_0401	helicase, putative	112.484	70.2567	147.324	249.429	215.684	297.67	275.571	280.438	222.566	316.184	235.79
SP_0402	signal peptidase I	355.77	128.085	364.139	351.755	234.308	210.539	206.521	242.897	401.907	657.737	412.23
SP_0403	ribonuclease HIII	283.937	403.555	108.817	255.491	121.366	134.558	138.343	166.331	221.406	559.835	233.937
SP_0404	hypothetical protein	536.52	715.349	943.36	274.456	197.939	234.508	334.124	321.267	520.58	699.811	578.453
SP_0405	conserved hypothetical protein	499.376	786.503	180.648	336.578	352.468	562.704	492.671	483.899	542.889	619.314	539.906
SP_0406	MutS2 family protein	136.488	114.852	49.282	80.9962	63.4217	109.659	90.6635	110.911	208.671	200.271	198.313
SP_0407	hypothetical protein	1059.62	514.853	4642.01	88.3698	161.456	166.752	201.797	273.393	376.784	400.794	424.338
SP_0408	sodium:alanine symporter family protein	23.9105	94.8243	0	20.4393	12.4478	24.7553	19.87	24.1192	116.957	74.0834	76.125
SP_0409	conserved hypothetical protein	105.637	132.855	81.5831	180.603	59.9945	68.0037	107.581	77.2667	699.258	414.448	286.005
SP_0410	exfoliative toxin, putative	84.942	116.7	78.2032	140.213	91.4916	75.0839	92.4718	80.0917	302.969	281.357	284.868
SP_0411	seryl-tRNA synthetase	262.579	459.936	190.699	388.827	271.246	150.16	154.855	131.099	358.418	378.507	298.84
SP_0412	conserved hypothetical protein	407.466	337.238	404.203	254.419	132.81	123.974	189.366	198.547	512.467	550.318	432.713
SP_0413	aspartate kinase	231.748	201.981	150	122.164	75.4052	82.6028	134.167	124.176	383.733	377.82	328.577
SP_0414	hypothetical protein	0	0	0	0	0	1.70738	10.5786	9.0663	17.7319	49.9284	8.30407
SP_0415	enoyl-CoA hydratase/isomerase family protein	20.1231	59.3893	0	74.5409	57.6188	165.376	428.193	380.575	768.775	702.445	177.003
SP_0416	transcriptional regulator, MarR family	2939.13	2159.62	970.798	321.178	492.162	607.32	976.118	1079.56	2313.48	2421.43	1027.15
SP_0417	3-oxoacyl-(acyl-carrier-protein) synthase III	1665.49	1467.73	272.344	268.1	392.71	492.593	755.949	920.939	1695.47	1496.47	758.079
SP_0418	acyl carrier protein	4797.76	4207.69	14901.3	2043.11	1500.46	947.369	1433.11	1396.32	7830.6	5066.55	3155.32
SP_0419	enoyl-(acyl-carrier-protein) reductase	206.835	206.469	216.563	397.528	363.151	304.515	731.434	601.952	844.888	734.062	212.291
SP_0420	malonyl CoA-acyl carrier protein transacylase	257.602	180.562	354.311	582.32	536.433	442.689	994.979	753.245	1114.75	968.492	314.777
SP_0421	3-oxoacyl-[acyl-carrier protein] reductase	334.918	298.924	502.61	560.279	770.555	564.612	1215.16	948.563	1815.31	1470.24	508.291
SP_0422	3-oxoacyl-(acyl-carrier-protein) synthase II	327.383	363.508	714.389	1024.62	826.09	762.354	1476.11	1089.56	2375.87	2055.98	761.963
SP_0423	acetyl-CoA carboxylase, bitoin carboxyl carrier protein	707.85	738.38	355.469	1010.8	1321.55	994.958	1929.7	1552.26	3167.87	2874.08	1113.72
SP_0424	(3R)-hydroxymyristoyl-(acyl-carrier-protein) dehydratase	673.054	586.259	506.733	831.052	1099.85	1014.57	1953.64	1523.92	2863.37	2628.83	1001.95
SP_0425	acetyl-CoA carboxylase, biotin carboxylase	494.274	444.663	668.843	629.247	647.063	690.8	1327.97	1038.81	2305.01	2067.99	723.487
SP_0426	acetyl-CoA carboxylase, carboxyl transferase subunit beta	323.815	492.98	464.939	940.878	864.264	722.696	1385.37	1218.7	2547.19	2275.17	814.724
SP_0427	acetyl-CoA carboxylase, carboxyl transferase subunit alpha	298.624	284.912	545.701	991.744	621.857	563.196	960.932	943.318	2340.61	1912.04	626.228
SP_0428	hypothetical protein	0	0	0	0	0	70.0293	107.927	119.407	123.937	227.576	54.0379
SP_0429	hypothetical protein	198.418	0	0	0	243.486	42.5296	59.9394	71.4483	85.6931	128.416	38.1273
SP_0430	hypothetical protein	238.725	0	0	43.4187	206.253	52.2022	47.6654	55.1489	82.655	103.555	29.501
SP_0431	conserved domain protein	233.581	0	0	152.13	173.718	46.048	48.8347	50.075	64.7049	94.7693	22.5646
SP_0433	N utilization substance protein B	1193.43	1248.39	1542.89	1033.49	1615.7	1082.4	1033.18	1028.06	1508.12	1856.72	1586.37
SP_0434	conserved hypothetical protein	1781.08	1372.72	828.516	947.596	1214.02	806.594	945.815	909.522	1234.42	1650.48	1350.52
SP_0435	translation elongation factor P	1054.92	1305.34	1836.27	498.084	506.384	245.784	320.851	283.88	684.457	828.48	721.829
SP_0436	glutamyl-tRNA(Gln) amidotransferase, B subunit	325.177	387.181	376.901	702.733	718.999	523.452	530.609	503.165	909.634	852.389	855.806
SP_0437	glutamyl-tRNA(Gln) amidotransferase, A subunit	240.792	352.009	159.198	353.298	384.489	286.22	353.193	292.739	551.386	583.907	563.953
SP_0438	glutamyl-tRNA(Gln) amidotransferase, C subunit	491.556	346.634	0	327.231	108.703	103.246	217.825	173.72	366.233	495.802	404.098
SP_0439	peptide chain release factor 3	286.647	215.272	111.817	606.749	434.363	432.378	534.091	583.549	366.45	446.802	372.255
SP_0441	ribosomal protein L28	14087.3	17860.1	24138	2408.43	2592.26	519.744	774.389	835.443	3226.21	4012.95	3343.34
SP_0442	conserved hypothetical protein	1029.96	1570.35	314.678	615.691	551.2	232.298	411.317	390.842	832.929	999.554	855.854
SP_0443	conserved hypothetical protein	1085.74	1275.97	935.983	1115.91	920.676	763.148	843.567	953.582	1421.36	1278.2	1196.6
SP_0444	hypothetical protein	529.81	1015.41	313.649	353.479	121.092	100.073	98.1425	113.489	221.507	226.736	205.273
SP_0445	acetolactate synthase, large subunit, biosynthetic type	376.59	214.396	259.549	278.201	239.621	47.6051	68.0816	76.1271	106.357	126.831	78.9467
SP_0446	acetolactate synthase, small subunit	397.906	348.632	187.795	462.969	586.928	84.7751	110.624	134.432	215.654	210.465	153.523
SP_0447	ketol-acid reductoisomerase	563.209	294.347	623.389	347.71	525.33	79.6409	109.298	110.946	226.615	218.125	188.265
SP_0448	hypothetical protein	1016.93	885.085	347.481	725.824	986.876	92.701	131.122	135.818	325.196	257.798	239.872
SP_0449	hypothetical protein	790.101	302.374	1209.79	454.473	726.551	64.529	69.7177	68.8328	208.963	151.536	136.903
SP_0450	threonine dehydratase	229.687	97.9497	0	68.4495	32.9107	14.232	20.5203	25.9031	47.4944	47.6019	41.5402
SP_0451	hypothetical protein	6077.74	5213.68	12826.5	1794.4	2058.56	508.465	884.747	685.236	1994.58	2386.16	2303.56
SP_0452	amino acid ABC transporter, ATP-binding protein	177.877	98.4312	103.619	231.121	194.466	81.4268	100.007	83.317	169.33	180.507	171.922
SP_0453	amino acid ABC transporter, amino acid-binding protein/permease protein	191.902	126.686	40.8585	34.5353	107.792	33.0846	43.4685	41.3854	86.1885	113.738	89.212
SP_0454	hypothetical protein	189.389	172.615	27.0404	66.6625	69.5974	192.628	138.797	157.504	102.999	89.5603	91.3289
SP_0455	hypothetical protein	601.223	648.334	130.962	289.915	409.305	321.07	238.736	271.597	357.906	437.849	310.358
SP_0457	bacitracin resistance protein	1246.4	889.735	760.099	644.598	866.251	1716.26	1025.08	1467.61	799.769	766.146	872.985
SP_0458	DNA-damage inducible protein P	58.5807	76.1087	114.368	52.2534	15.9116	36.5695	38.9663	37.637	37.9711	50.7784	52.5459
SP_0459	formate acetyltransferase	1893.48	1528.39	1232.9	1942.31	2256.01	3755.02	2985.35	2208.76	6014.67	5180.38	8549.76
SP_0460	IS1167, transposase	0	0	0	0	0	1.73059	2.46381	2.17048	2.76582	3.64699	2.81252
SP_0461	transcriptional regulator, putative	13.7837	0	4.18199	11.7826	21.5274	18.7331	120.478	68.9145	91.1354	82.0044	74.6932
SP_0462	cell wall surface anchor family protein	15.7264	56.566	28.6284	13.4433	26.0966	33.4553	226.92	134.798	228.931	129.702	129.942
SP_0463	cell wall surface anchor family protein	44.8591	62.7891	41.6315	87.9717	70.0612	101.801	929.606	347.629	761.426	420.002	484.218
SP_0464	cell wall surface anchor family protein	55.7557	51.8338	13.5331	91.5098	125.395	151.159	1083.36	450.939	985.447	476.189	536.444
SP_0465	hypothetical protein	59.912	0	0	0	0	4.2442	36.9837	22.1163	42.7912	42.489	24.4844
SP_0466	sortase, putative	0	0	0	16.0959	0	10.8846	99.0606	51.8743	27.7959	22.5985	14.975
SP_0467	sortase, putative	30.1847	70.5249	16.281	40.1374	0	29.0809	162.795	82.9878	81.4982	65.3843	47.7304
SP_0468	sortase, putative	34.0345	20.5458	105.139	10.5795	67.6523	49.1718	237.291	114.742	132.312	98.3431	82.2395
SP_0470	hypothetical protein	0	175.05	170.625	570.869	82.3425	209.005	226.266	188.7	219.731	342.439	289.247
SP_0471	conserved hypothetical protein	46.2479	92.1316	112.253	679.982	216.691	262.15	229.995	197.652	286.03	359.086	298.515
SP_0472	hypothetical protein	484.805	217.974	0	103.606	165.631	160.15	177.245	169.383	347.614	420.757	368.548
SP_0473	ROK family protein	23.6907	52.4388	115.005	29.4566	47.0913	56.5452	41.296	44.0412	96.4881	104.172	83.0515
SP_0474	PTS system, cellobiose-specific IIC component	7.97016	0	24.1816	27.2524	24.8957	20.7494	20.0876	16.7415	12.4754	14.9115	7.70652
SP_0475	hypothetical protein	9.50691	0	6.59294	13.9316	4.24227	23.2637	23.1165	23.79	10.1366	14.845	6.79214
SP_0476	PTS system, lactose-specific IIA component	0	0	241.101	0	23.8674	17.0831	20.51	22.1848	12.0331	24.8208	10.7833
SP_0477	6-phospho-beta-galactosidase	13.0594	26.8418	0	0	0	16.7396	16.0325	16.9777	13.1409	19.5687	10.3504
SP_0478	PTS system, lactose-specific IIBC components	12.553	0	0	37.5572	0	21.429	19.7533	22.7489	18.5106	28.8941	14.6082
SP_0479	potassium uptake protein, Trk family	339.585	204.63	173.291	197.175	285.911	168.428	183.946	143.094	248.333	301.835	281.988
SP_0480	potassium uptake protein, Trk family	223.583	155.6	251.198	126.86	201.282	77.6527	105.804	87.7779	177.714	230.172	209.65
SP_0481	conserved hypothetical protein	108.334	136.55	36.5208	113.186	9.39983	22.8571	33.3434	29.5441	60.8035	74.5908	59.4954
SP_0482	conserved hypothetical protein	122.443	116.913	0	65.6737	59.9945	41.5533	59.3733	59.5799	113.587	109.899	88.9609
SP_0483	ABC transporter, ATP-binding protein	180.128	136.947	100.748	139.249	190.811	89.511	141.62	129.96	156.709	235.805	142.396
SP_0484	conserved hypothetical protein	60.2725	66.7058	165.543	97.6215	89.1796	108.946	146.9	127.982	168.218	213.377	154.953
SP_0486	RNA methyltransferase, TrmH family	109.839	40.5209	0	0	0	25.8108	13.9851	38.154	38.0396	55.0956	59.6278
SP_0487	hypothetical protein	1721.31	1345.51	1197.88	576.219	1052.78	3540.02	1221.28	3482.64	1597.55	1890.05	2724.02
SP_0488	conserved hypothetical protein	1600.84	1908.79	589.927	471.462	277.395	2539.77	1314.34	2111.31	2138.05	1969.47	2104.72
SP_0489	PAP2 family protein	621.576	1550.62	176.915	214.612	94.8646	315.194	293.788	328.746	459.645	722.438	389.702
SP_0490	hypothetical protein	767.181	1627.07	0	184.897	42.2269	396.043	507.102	540.323	611.003	1061.1	535.05
SP_0491	hypothetical protein	219.677	626.515	287.11	0	0	174.606	219.321	225.298	262.407	448.942	246.077
SP_0492	conserved domain protein	890.914	540.278	365.343	83.4604	228.729	316.048	407.117	399.941	629.274	814.756	419.386
SP_0493	DNA-directed RNA polymerase, delta subunit, putative	1398.94	1490.2	1437.79	807.199	880.778	616.425	874.862	869.616	1269.02	1896.9	1196.23
SP_0494	CTP synthase	391.813	232.239	91.52	196.194	168.986	187.915	203.905	205.572	232.16	219.413	176.084
SP_0495	IS1380-Spn1, transposase	5.87111	4.33185	4.75014	6.6917	0	10.298	10.9033	8.82938	11.2258	13.7723	15.4146
SP_0496	Na/Pi cotransporter II-related protein	106.608	114.412	168.586	115.985	90.8189	125.428	116.107	165.574	217.006	299.121	250.116
SP_0497	hypothetical protein	189.991	0	0	0	148.365	8.883	10.0068	7.89013	44.8801	67.841	40.9518
SP_0498	endo-beta-N-acetylglucosaminidase, putative	70.932	138.259	59.7445	71.4944	100.035	119.604	72.0762	81.6418	85.6428	103.914	57.839
SP_0499	phosphoglycerate kinase	1526.18	1384.41	1590.26	4055.04	2899.53	2770.33	3022.35	1819.74	2105.52	1971.33	1659.32
SP_0500	conserved domain protein	199.707	348.111	169.656	93.8929	109.166	39.8318	64.3319	62.9352	117.604	137.322	126.187
SP_0501	transcriptional regulator, MerR family	1665.12	1945	1406.94	807.952	599.693	1310.7	1151.05	1200.45	2174.41	1869.19	1028.3
SP_0502	glutamine synthetase, type I	1951.17	1607.12	1403.67	642.403	623.529	2703.67	1924.53	2261.65	2384.53	1795.63	1222.43
SP_0503	hypothetical protein	439.355	267.438	293.262	0	0	89.0773	141.93	215.143	299.51	421.948	210.231
SP_0504	hypothetical protein	534.867	443.968	185.462	0	0	73.886	95.9915	121.502	361.357	346.07	188.454
SP_0505	type I restriction-modification system, S subunit, putative	34.9838	66.0481	0	49.2553	12.856	30.8326	50.4418	47.7393	50.7228	49.5794	52.2203
SP_0506	integrase/recombinase, phage integrase family	46.2479	36.5602	56.1267	79.0677	41.2744	52.3868	62.7914	72.5304	84.198	77.4746	70.672
SP_0507	type I restriction-modification system, S subunit, putative	165.979	113.458	189.584	258.727	144.862	252.645	193.456	155.675	127.082	127.903	160.026
SP_0508	type I restriction-modification system, S subunit	166.333	143.179	55.0535	149.367	209.923	217.067	195.129	182.246	149.012	147.95	183.351
SP_0509	type I restriction-modification system, M subunit	136.848	67.7562	43.7052	172.394	168.735	138.865	154.244	141.069	135.949	113.661	150.888
SP_0510	type I restriction-modification system, R subunit	126.498	65.625	54.8281	189.234	111.131	91.625	124.787	108.395	143.792	134.231	152.852
SP_0511	hypothetical protein	0	0	0	0	0	4.51662	3.8269	4.23094	3.80327	10.3372	5.49742
SP_0512	hypothetical protein	118.745	0	0	0	0	6.86414	6.54768	8.00448	5.55335	15.7825	8.69309
SP_0513	hypothetical protein	68.6492	0	0	0	0	5.42727	4.85671	6.54473	6.61762	11.2351	7.08441
SP_0514	hypothetical protein	0	0	0	0	0	5.05499	2.2067	3.42852	4.1572	7.85163	5.97988
SP_0515	heat-inducible transcription repressor HrcA	359.125	0	488.384	296.103	473.37	3069.1	2662.08	2249.6	521.543	856.361	1238.82
SP_0516	heat shock protein GrpE	326.378	0	676.407	145.936	697.951	3642.02	4122.51	3190.88	528.937	994.883	1914.65
SP_0517	dnaK protein	263.035	144.755	684.044	995.759	984.137	10270.8	8076.59	7675.57	761.81	1215.79	2935.27
SP_0518	hypothetical protein	143.463	615.255	435.268	1471.63	1148.31	3961.51	3612.6	3728.84	577.655	837.862	2516.05
SP_0519	dnaJ protein	266.627	151.392	216.658	344.852	452.63	1386.69	1348.85	1544.81	236.996	342.062	780.067
SP_0520	hypothetical protein	576.653	400.143	844.239	156.488	243.025	105.55	182.46	148.303	430.298	493.027	490.257
SP_0521	HIT family protein	250.144	198.759	202.384	197.381	130.225	82.2495	146.973	127.361	327.418	361.288	358.53
SP_0522	ABC transporter, ATP-binding protein	216.076	107.613	236.008	233.963	202.482	119.195	177.277	171.197	309.517	347.681	425.322
SP_0523	ABC transporter, permease protein, putative	404.207	283.414	420.469	596.622	458.765	415.502	452.609	422.477	526.529	529.852	594.018
SP_0524	BlpT protein, fusion	111.836	132.614	48.4731	163.886	24.9523	24.4126	27.1768	19.5392	452.767	434.477	143.207
SP_0525	blpS protein	225.51	163.518	320.866	279.186	170.029	71.6571	110.716	121.274	441.155	417.775	397.606
SP_0526	response regulator BlpR	107.16	86.9716	69.3598	305.343	145.048	126.47	175.297	164.714	447.171	383.597	421.171
SP_0527	putative histidine kinase BlpH	202.477	113.132	577.339	346.164	426.756	148.56	192.228	194.803	293.412	282.607	368.277
SP_0528	peptide pheromone BlpC	204.351	67.8489	0	69.8738	191.494	23.5385	22.3236	14.7591	66.5084	66.3811	53.9829
SP_0529	transport protein BlpB	87.0968	66.4042	42.2805	59.562	60.457	34.3792	26.9428	20.9963	104.935	103.811	76.1048
SP_0531	bacteriocin BlpI	159.765	0	807.884	182.095	145.555	9.90314	16.4141	15.834	485.92	970.743	414.767
SP_0532	bacteriocin BlpJ	756.667	0	0	450.686	198.232	23.4469	26.6643	25.3856	143.506	118.291	40.776
SP_0533	bacteriocin BlpK	639.062	0	0	214.612	356.461	43.1211	46.2445	39.8368	128.578	93.0994	36.1856
SP_0534	hypothetical protein	135.186	0	164.063	77.0403	70.3782	29.4961	22.0347	22.6735	26.5579	40.785	29.3126
SP_0535	hypothetical protein	207.695	0	0	191.2	49.9045	14.1926	13.5468	13.6159	280.116	210.84	86.312
SP_0536	immunity protein BlpL	146.452	108.056	0	66.7683	50.8287	23.3777	19.5707	18.3027	215.849	160.014	65.3048
SP_0537	IS1381, transposase OrfA	81.1117	104.731	164.063	0	0	42.3767	46.9057	43.7089	44.5462	59.3002	49.9309
SP_0538	IS1381, transposase OrfB	135.186	164.577	114.844	92.4484	63.3404	19.9099	47.1167	44.7178	54.1587	143.641	56.9063
SP_0539	bacteriocin BlpM	0	0	0	0	0	0.790919	1.50575	2.53856	0.296001	3.74262	0.592682
SP_0540	blpN protein	0	0	0	0	0	3.67997	5.44489	6.40863	1.41834	2.43527	0.968808
SP_0541	bacteriocin BlpO	35.1484	0	0	0	0	13.8938	18.0098	19.0392	6.87709	9.67442	3.4102
SP_0542	hypothetical protein	43.9355	0	0	0	0	15.6866	17.1413	16.2891	8.17702	11.1125	2.80954
SP_0543	hypothetical protein	1671.12	251.808	38.086	429.225	220.56	12.2051	13.3049	16.0171	378.749	304.427	148.228
SP_0544	immunity protein BlpX	726.753	116.993	224.507	361.452	206.372	17.3266	17.4592	16.4784	189.205	156.85	66.3743
SP_0545	immunity protein BlpY	613.187	164.902	194.735	156.76	155.138	46.0529	33.8256	26.7837	147.387	134.733	71.2705
SP_0546	BlpZ protein, fusion	1582.8	0	68.3594	115.56	175.945	70.3884	48.699	40.3567	133.327	130.121	77.0575
SP_0547	conserved domain protein	904.554	81.0417	115.005	103.098	154.729	46.6496	37.3524	34.1171	69.6219	85.213	43.1594
SP_0548	hypothetical protein	889.426	379.512	312.119	109.923	234.308	35.8914	85.0656	75.6409	173.666	357.343	175.992
SP_0549	conserved hypothetical protein	659.032	382.623	594.391	258.59	241.853	141.742	204.253	210.68	343.631	560.715	329.998
SP_0550	conserved hypothetical protein	638.308	516.068	145.876	248.019	187.73	165.322	208.736	212.206	390.535	543.538	430.004
SP_0552	conserved hypothetical protein	1010.52	668.594	79.9805	169.007	162.969	203.879	299.288	238.361	310.832	384.171	279.719
SP_0553	N utilization substance protein A	761.626	388.744	157.569	162.516	224.505	221.886	285.574	222.052	275.09	334.427	271.44
SP_0554	conserved hypothetical protein	842.844	1027.08	65.2902	337.248	336.092	255.536	344.179	284.898	326.439	357.076	330.62
SP_0555	ribosomal protein L7A family	738.116	452.213	127.969	315.48	356.817	208.258	317	271.161	316.933	322.175	306.143
SP_0556	translation initiation factor IF-2	891.996	624.672	275.776	344.633	420.728	438.872	490.882	399.588	628.088	560.935	717.77
SP_0557	ribosome-binding factor A	863.689	556.902	1020.83	154.081	281.513	185.245	167.878	151.048	412.597	295.03	429.389
SP_0558	conserved hypothetical protein	0	0	0	0	0	3.92713	4.03325	4.01317	2.05042	5.15892	4.2884
SP_0559	hypothetical protein	0	0	0	0	0	2.57157	4.42115	3.81478	3.09345	6.57249	5.39991
SP_0560	hypothetical protein	0	0	0	0	0	3.35183	1.64088	2.38668	2.63428	4.19024	3.37841
SP_0561	conserved domain protein	257.183	249.055	0	164.885	100.418	103.666	153.687	138.331	248.481	293.517	228.639
SP_0562	conserved hypothetical protein	133.287	61.191	38.3427	162.044	104.856	79.4148	104.959	108.806	165.802	198.874	147.659
SP_0563	hypothetical protein	304.964	5.72059	0	70.6958	0	41.0399	74.6959	95.7188	153.476	173.34	148.672
SP_0564	hypothetical protein	226.334	298.381	500.888	45.5238	62.3807	65.1909	82.5208	85.5163	202.329	247.11	180.668
SP_0565	conserved domain protein	193.316	103.733	28.4375	60.0915	91.4916	55.0275	72.0393	60.6435	86.2431	98.6616	91.3521
SP_0566	acetyltransferase, GNAT family	155.066	166.417	11.4054	0	44.0334	43.7402	45.1236	38.5762	65.0978	61.8954	74.4169
SP_0567	conserved domain protein	93.1965	98.2324	96.9461	91.0477	90.1054	65.5871	76.9917	59.5964	73.6377	80.246	80.8514
SP_0568	valyl-tRNA synthetase	238.564	309.132	229.205	397.664	478.158	519.146	466.337	310.481	348.883	293.021	348.499
SP_0569	type II DNA modification methyltransferase, truncation	335.507	274.068	0	0	74.8568	54.1221	91.5866	76.4646	151.189	161.953	190.45
SP_0570	conserved domain protein	101.832	154.509	103.651	67.3923	125.694	54.1386	63.0288	59.9923	93.4607	99.8476	107.326
SP_0571	cell filamentation protein Fic-related protein	163.938	137.892	111.416	224.222	209.953	156.322	172.027	146.299	210.168	220.201	243.185
SP_0573	hypothetical protein	65.0896	0	0	0	0	14.1788	20.5696	20.6062	21.6656	32.8452	21.3138
SP_0574	hypothetical protein	12.689	0	0	10.8468	19.8177	16.6385	16.3864	19.4898	21.3149	24.7469	18.2849
SP_0575	helicase, putative	12.8045	0	27.1944	10.9456	0	15.858	15.0036	19.3513	11.8697	18.63	10.5104
SP_0576	transcription antiterminator Lict	75.318	90.3036	38.086	32.1919	0	2.48104	2.30184	3.12787	21.5358	14.7077	7.50134
SP_0577	PTS system, beta-glucosides-specific IIABC components	36.5532	77.7366	0	34.31	4.47757	4.50259	4.69033	5.98405	16.8213	14.2394	7.48495
SP_0578	6-phospho-beta-glucosidase	93.0837	94.7776	0	41.3765	23.2606	8.19778	8.33824	10.0933	20.025	18.6224	13.982
SP_0579	phenylalanyl-tRNA synthetase, alpha subunit	417.954	192.271	73.3346	99.0046	70.7815	38.6867	62.6453	39.812	89.43	93.1755	69.5765
SP_0580	acetyltransferase, GNAT family	423.848	254.566	50.1839	114.881	153.383	51.256	97.1745	65.4302	110.014	110.869	89.609
SP_0581	phenylalanyl-tRNA synthetase, beta subunit	225.704	157.637	138.287	213.542	143.74	114.264	145.156	90.0367	211.686	196.413	180.019
SP_0582	hypothetical protein	89.4495	139.761	127.713	80.9615	90.3959	52.2886	58.3832	60.8673	147.847	253.525	149.138
SP_0584	transcriptional regulator, putative	123.762	95.8803	0	0	38.6584	2.78802	4.37788	5.89948	18.309	15.099	16.3742
SP_0585	5-methyltetrahydropteroyltriglutamate--homocysteine methyltransferase	11.7161	15.56	62.5626	32.0488	43.916	5.32347	6.79559	6.52693	10.735	13.5907	12.7934
SP_0586	5,10-methylenetetrahydrofolate reductase, putative	45.6078	0	73.7998	124.757	180.451	15.2627	15.6743	11.7412	17.1651	21.5932	20.5562
SP_0587	hypothetical protein	693.204	691.556	639.844	83.4604	167.735	42.3703	52.5667	61.5367	212.696	407.168	196.431
SP_0588	polyribonucleotide nucleotidyltransferase	479.242	690.502	349.689	421.373	546.718	222.738	264.011	246.346	588.654	579.706	507.298
SP_0589	serine acetyltransferase	599.314	1137.73	419.315	707.387	659.539	381.83	472.812	402.535	785.214	776.289	701.962
SP_0590	acetyltransferase, GNAT family	635.948	947.776	422.948	733.32	674.557	350.814	368.471	352.789	646.017	660.132	594.053
SP_0591	cysteinyl-tRNA synthetase	566.846	362.517	542.725	1026.12	912.874	547.079	566.092	485.444	714.937	710.494	642.043
SP_0592	conserved hypothetical protein	626.677	674.719	421.603	1071.4	1191.52	788.034	751.844	702.27	918.733	971.529	843.599
SP_0593	leucine-rich protein	701.479	675.806	542.241	830.077	846.685	519.227	598.37	510.868	640.971	666.351	612.155
SP_0595	hypothetical protein	92.4958	0	28.0634	0	108.345	19.5099	25.9526	26.2207	44.3612	47.4202	36.8147
SP_0596	hypothetical protein	0	0	174.107	30.6589	168.046	14.4823	32.277	31.1708	50.149	68.6583	58.4448
SP_0598	hypothetical protein	0	0	116.335	0	0	149.124	247.749	346.629	49.024	74.8757	61.5105
SP_0599	transmembrane protein Vexp1	13.5883	22.558	8.24542	7.74374	0	329.961	368.662	518.432	58.9986	67.131	67.2572
SP_0600	ABC transporter, ATP-binding protein Vexp2	24.4086	139.572	19.7483	27.8201	12.7072	639.394	614.506	858.195	108.949	94.9445	121.639
SP_0601	transmembrane protein Vexp3	45.8457	12.6848	0	0	0	1026.03	1000.14	1425.16	178.554	142.871	200.905
SP_0603	DNA-binding response regulator VncR	88.2722	115.457	77.911	137.195	156.664	674.055	643.053	851.675	296.828	290.523	401.768
SP_0604	sensor histidine kinase VncS	58.5145	117.446	197.394	206.861	210.658	919.021	810.794	1010.66	339.017	333.577	481.473
SP_0605	fructose-bisphosphate aldolase	3903.38	3301.21	3511.16	2524.25	2156.59	3430.36	4645.42	3046.22	4612.07	5063.62	4420.2
SP_0606	oxidoreductase, putative	54.7824	2.42519	0	37.4635	34.2238	11.5027	13.9638	14.6342	28.1508	39.677	25.1552
SP_0607	amino acid ABC transporter, permease protein	0	35.3637	0	20.4857	0	14.4982	17.6608	16.9815	13.1328	24.4039	11.7666
SP_0608	amino acid ABC transporter, permease protein	3.8881	0	0	0	0	13.7167	18.2234	16.4932	13.5078	22.5991	11.0427
SP_0609	amino acid ABC transporter, amino acid-binding protein	31.0133	41.951	0	11.7826	0	12.3618	14.1433	13.4063	12.136	16.4573	6.99061
SP_0610	amino acid ABC transporter, ATP-binding protein	27.7853	53.8143	0	0	0	10.4518	12.0509	12.6761	9.94469	14.4687	6.8008
SP_0611	single-stranded-DNA-specific exonuclease RecJ	175.505	291.356	126.645	117.588	135.2	70.6858	106.472	111.026	143.14	138.792	147.593
SP_0612		319.531	589.394	193.892	0	249.523	41.5366	70.7816	75.3876	82.0879	124.397	102.165
SP_0613	metallo-beta-lactamase superfamily protein	737.545	679.346	820.017	740.296	552.418	483.676	493.291	549.281	536.559	579.711	562.363
SP_0614	tributyrin esterase	212.918	127.173	155.86	254.233	327.259	99.3195	122.714	145.935	173.395	185.594	162.357
SP_0615	beta-lactam resistance factor	348.677	399.036	183.412	236.232	263.01	185.983	286.009	276.633	308.34	340.597	360.825
SP_0616	beta-lactam resistance factor	349.56	421.18	171.248	212.001	307.198	257.844	286.74	295.775	426.079	402.396	442.823
SP_0617	conserved domain protein	309.918	351.069	150.448	137.138	176.53	136.331	203.344	216.673	300.912	308.087	183.615
SP_0618	excinuclease ABC, subunit C	92.8718	137.573	72.8278	102.595	129.427	143.481	183.933	146.108	184.466	191.192	216.994
SP_0619	conserved hypothetical protein	181.748	447.77	0	194.541	291.259	202.719	281.759	235.091	226.637	254.432	296.204
SP_0620	amino acid ABC transporter, amino acid-binding protein, putative	159.616	131.124	103.845	129.41	113.08	143.87	140.246	134.788	176.749	157.584	169.596
SP_0621	hypothetical protein	605.597	315.406	115.287	365.421	185.456	283.247	271.296	280.843	365.728	400.097	446.385
SP_0622	nitroreductase family protein	613.357	418.849	549.041	617.276	353.285	537.049	622.044	502.33	916.641	909.064	879.812
SP_0623	dipeptidase	675.496	500.827	463.556	881.427	705.289	1106.99	1186.86	977.981	1475.54	1501.09	1609.72
SP_0624	conserved hypothetical protein	295.939	302.332	121.559	179.029	92.4397	235.744	243.425	203.743	315.957	320.968	304.758
SP_0626	branched-chain amino acid transport system II carrier protein	1181.44	1292.32	667.996	268.866	310.089	98.4776	111.034	105.915	391.567	284.254	807.236
SP_0627	conserved hypothetical protein	406.34	314.798	92.4631	312.615	170.555	518.87	696.632	533.967	747.834	703.565	693.431
SP_0628	HIT family protein	418.433	217.076	31.7383	527.589	343.094	610.167	783.685	666.297	885.919	756.968	831.998
SP_0629	conserved hypothetical protein	512.887	429.284	124.935	465.143	338.787	647.325	908.103	705.947	900.973	786.126	947.291
SP_0630	ribosomal protein L11	4554.44	5684.33	1900.01	1290.7	1179.08	1999.17	2117.38	2195.86	4263.42	4325.04	4980.82
SP_0631	ribosomal protein L1	3598.89	4524.24	2406.37	849.118	531.049	2119.41	1729.28	1851.24	3632.28	2863.79	3910.87
SP_0633	hypothetical protein	0	0	0	0	0	7.77846	5.74211	8.56678	6.61925	12.1732	6.46939
SP_0634	conserved domain protein	53.9559	0	18.7089	79.0677	72.2302	15.6276	24.459	32.697	50.4673	64.1444	42.4576
SP_0635	hypothetical protein	0	0	19.043	160.959	147.04	26.4778	51.0975	62.0286	82.7437	114.16	75.0134
SP_0636	ABC transporter, ATP-binding protein	98.2244	82.2659	25.7742	322.243	215.6	183.416	219.74	212.48	275.975	296.399	275.692
SP_0637	membrane protein	180.248	349.103	54.6876	313.664	206.108	224.354	233.373	223.496	272.399	288.799	319.245
SP_0638	conserved hypothetical protein	179.431	215.286	183.162	401.374	277.618	344.423	292.755	300.994	364.357	342.54	384.032
SP_0639	hypothetical protein	149.568	268.99	90.7581	447.49	540.19	521.415	488.224	502.762	509.982	512.047	586.85
SP_0640	hypothetical protein	342.911	272.775	221.084	421.373	518.825	549.167	479.01	486.868	535.777	512.1	623.156
SP_0641	serine protease, subtilase family	608.038	709.503	587.744	1744.36	1678.13	1115.4	1462.78	1204.54	1131.56	1068.41	755.138
SP_0645	PTS system IIA component, putative	256.732	175.753	179.876	443.446	603.514	420.558	249.258	197.019	844.201	630.181	570.523
SP_0646	PTS system, IIB component, putative	232.6	238.358	0	544.947	914.916	909.85	588.497	464.947	703.701	751.985	411.952
SP_0647	PTS system, IIC component, putative	497.4	276.728	169.065	699.235	647.136	2727.93	1280.77	1034.92	648.136	612.242	459.593
SP_0648	beta-galactosidase	696.596	709.568	90.6971	434.412	585.44	7617.44	3284	3628.41	395.464	496.905	584.155
SP_0650	hypothetical protein	184.775	227.22	438.523	140.401	89.7815	41.5725	70.0178	72.875	144.141	231.78	151.75
SP_0652	conserved hypothetical protein	146.452	41.828	160.534	137.306	73.7836	59.919	91.6416	91.3519	78.7267	129.166	94.2556
SP_0653	hypothetical protein	51.6888	0	100.368	53.0219	113.019	83.4859	122.181	126.48	98.1243	160.01	127.244
SP_0654		38.7666	0	0	0	282.548	128.634	172.086	173.469	136.654	203.281	187.379
SP_0655	sodium/hydrogen exchanger family protein	88.5124	167.526	21.7952	144.746	96.1664	87.7292	111.68	110.579	113.52	136.264	125.948
SP_0657	ribonuclease BN, putative	76.5427	91.4896	85.4612	151.799	109.981	79.0054	102.076	95.4983	123.901	144.371	136.632
SP_0658	cytochrome c-type biogenesis protein CcdA	85.2756	0	80.993	259.889	359.018	27.7832	42.9907	36.3468	24.5408	30.0452	23.0388
SP_0659	thioredoxin family protein	37.1941	5.14551	428.82	333.841	929.439	35.3136	47.5967	47.7044	26.2251	31.2427	30.1612
SP_0660	peptide methionine sulfoxide reductase	36.6129	112.212	604.981	563.357	730.174	61.4582	75.2021	67.4509	36.1004	42.7683	45.4594
SP_0661	DNA-binding response regulator	239.323	221.382	1183.45	506.869	987.44	135.595	152.312	144.299	247.595	208.999	280.466
SP_0662	sensor histidine kinase, putative	84.1318	63.7988	975.649	559.362	729.987	152.435	155.277	146.86	213.846	196.018	272.187
SP_0663	conserved hypothetical protein	780.556	765.586	272.274	519.408	744.586	269.588	485.574	487.593	667.144	581.517	550.922
SP_0664	zinc metalloprotease ZmpB, putative	1409.11	1293.39	888.484	995.404	1184.97	675.879	983.187	940.575	1581.01	1237.55	2002.31
SP_0665	chorismate binding enzyme	139.308	42.3563	100.324	183.206	162.581	198.717	217.992	190.975	144.225	153.071	172.509
SP_0666	conserved hypothetical protein	123.702	184.114	305.427	517.778	226.508	272.339	264.809	280.988	176.446	170.569	199.819
SP_0667	pneumococcal surface protein, putative	179.436	192.748	25.6194	496.251	300.851	243.183	277.213	274.071	198.712	167.103	190.922
SP_0668	glucokinase	366.813	427.173	338.858	659.883	598.543	530.949	440.413	412.919	566.298	470.525	535.53
SP_0669	thymidylate synthase	298.134	142.402	350.391	85.8449	49.0134	125.799	143.481	111.032	294.702	275.525	314.89
SP_0670	hypothetical protein	4393.55	3173.42	748.356	737.965	240.767	907.514	1882.62	996.646	1889.14	2044.67	1822.04
SP_0671	tRNA isopentenylpyrophosphate transferase	300.846	151.644	126.523	218.977	148.868	132.253	147.001	141.615	150.577	184.285	155.85
SP_0672	GTP-binding protein HflX	348.931	230.763	108.448	312.825	229.283	257.825	254.35	245.159	256.474	288.135	274.081
SP_0673	hypothetical protein	380.211	222.085	123.047	346.681	316.702	248.245	293.446	257.192	287.889	310.706	355.515
SP_0674	metallo-beta-lactamase superfamily protein	189.915	188.226	65.3604	295.611	367.442	366.936	401.395	343.047	384.638	396.381	485.541
SP_0675	oxidoreductase, short chain dehydrogenase/reductase family	226.651	339.603	330.078	369.61	457.458	495.541	485.181	437.096	529.443	528.043	670.492
SP_0676	transcriptional regulator, putative	125.141	69.2493	118.857	88.3698	59.4837	81.8093	78.7546	76.8511	99.6407	104.494	124.055
SP_0677	conserved hypothetical protein	498.727	696.521	461.149	263.915	222.547	100.388	217.124	237.847	437.071	549.147	457.591
SP_0678	conserved hypothetical protein	401.301	658.544	797.706	402.187	583.529	142.72	215.594	225.606	489.631	468.245	500.637
SP_0679	hypothetical protein	452.669	279.962	1276.46	500.762	852.536	102.087	80.7547	97.1834	231.269	144.139	220.536
SP_0680	ribosomal small subunit pseudouridine synthase A	0	0	35.2531	0	22.6839	3.27189	3.66437	6.15409	10.8646	26.7053	10.3286
SP_0681	elongation factor Tu family protein	805.007	993.091	673.886	386.582	268.217	475.39	465.239	489.673	903.625	774.284	935.698
SP_0682	hypothetical protein	1478.3	1132.68	1380.06	459.523	532.804	995.68	959.592	1062.26	1646.75	1291.46	1906.07
SP_0683	hypothetical protein	319.531	0	0	0	83.1742	10.6388	6.64876	8.84651	2.79556	7.26307	7.39817
SP_0684	hypothetical protein	0	0	0	0	0	22.6428	28.426	19.5681	23.1944	23.4234	21.0716
SP_0685	hypothetical protein	0	0	0	0	0	7.34931	12.8284	7.91595	8.65723	9.41857	7.37544
SP_0686	conserved hypothetical protein	6.51862	62.0438	15.8221	40.1204	8.14466	40.5741	36.6428	25.0027	15.7033	22.1707	19.7556
SP_0687	ABC transporter, ATP-binding protein	0	18.1776	0	0	12.8259	40.4032	28.43	24.1796	19.0072	24.5791	23.7946
SP_0688	UDP-N-acetylmuramoylalanine--D-glutamate ligase	227.958	163.88	208.079	243.164	219.093	189.892	213.977	205.205	330.214	316.007	285.332
SP_0689	UDP-N-acetylglucosamine--N-acetylmuramyl-(pentapeptide) pyrophosphoryl-undecaprenol N-acetylglucosamine transferase	348.497	134.993	72.5036	221.3	178.836	148.211	166.447	174.799	221.178	214.966	200.722
SP_0690	cell division protein DivIB	387.731	275.947	15.9961	232.854	216.149	142.505	173.139	200.293	269.59	264.87	261.83
SP_0691	hypothetical protein	0	1091.58	348.215	275.93	308.084	114.105	147.952	172.173	284.548	295.622	248.331
SP_0692	hypothetical protein	798.827	1127.22	484.731	307.286	499.045	101.352	132.871	122.024	224.821	217.298	221.329
SP_0693	hypothetical protein	45.062	374.039	136.719	346.681	633.404	161.75	232.302	253.314	311.168	373.546	319.955
SP_0694	conserved domain protein	280.439	212.088	0	79.9089	131.398	26.6012	27.2802	31.9571	44.677	43.4857	49.0588
SP_0695	HesA/MoeB/ThiF family protein	111.911	87.1581	30.1813	191.329	77.6816	67.7743	79.3892	89.0094	128.649	128.741	129.016
SP_0696	hypothetical protein	179.893	7.65749	8.39691	94.6322	43.2244	22.7623	19.6518	29.1169	37.3769	40.1128	51.3544
SP_0698	hypothetical protein	121.838	353.451	0	252.485	103.793	56.3844	62.8227	69.3483	96.7817	98.0149	86.2646
SP_0699	hypothetical protein	133.138	972.501	0	273.143	83.1742	53.0808	41.1392	51.6687	88.8227	75.668	87.2514
SP_0701	orotidine 5-phosphate decarboxylase	41.3069	16.6239	0	57.7802	58.6485	59.4072	60.7516	61.3486	181.389	69.8186	136.296
SP_0702	orotate phosphoribosyltransferase PyrE	0	64.5261	101.081	92.5579	58.5373	96.594	86.4378	92.9002	261.14	94.654	229.245
SP_0703	hypothetical protein	645.889	548.59	373.698	564.962	703.782	758.567	523.206	359.449	488.794	339.614	464.895
SP_0704	hypothetical protein	103.378	137.294	25.0919	17.674	48.4368	32.2812	24.9524	24.6058	28.6134	25.1901	36.4728
SP_0705	hypothetical protein	108.199	21.7724	39.7913	28.0277	40.9664	29.3357	20.3308	24.1227	22.8913	23.4803	27.705
SP_0706	hypothetical protein	127.132	186.224	0	51.1417	35.0394	43.7857	31.472	38.4385	33.065	30.5605	40.5168
SP_0707	ABC transporter, ATP-binding protein	52.8853	171.088	0	69.5503	114.365	49.2453	37.7744	40.4486	38.8467	39.7048	54.7197
SP_0709	amino acid ABC transporter, ATP-binding protein	93.7754	3.84388	0	23.7516	0	53.8977	33.0451	34.0984	23.8838	34.6044	35.5663
SP_0710	amino acid ABC transporter, permease protein	7.77619	0	0	0	0	50.1567	29.3678	28.5495	15.4746	18.7233	22.4455
SP_0711	amino acid ABC transporter, permease protein	0	0	0	0	0	59.0547	33.7196	31.5787	16.6113	20.3577	24.5618
SP_0713	lysyl-tRNA synthetase	551.873	529.736	195.075	329.77	195.257	256.691	313.905	339.326	851.727	1155.98	800.385
SP_0714	IS1380-Spn1, transposase	9.78519	2.16593	14.2504	13.3834	6.11303	9.89041	9.8954	8.40534	11.8983	14.0441	15.0262
SP_0715	lactate oxidase	1228.8	2270.88	641.533	2497.2	2063.99	3140.71	3092.19	1908.39	2215.34	2074.83	2353.33
SP_0716	transcriptional regulator, putative	55.1656	34.8879	0	0	0	19.3947	36.4862	33.5629	68.5791	65.9735	47.9277
SP_0717	hydroxyethylthiazole kinase	1.68335	48.4387	0	11.5118	10.5163	15.6408	40.5437	41.1422	58.3534	48.9047	43.5629
SP_0718	thiamine-phosphate pyrophosphorylase	46.0277	50.9405	0	0	52.2809	16.9137	32.1495	33.505	61.7221	47.9155	45.414
SP_0719	conserved hypothetical protein	23.4949	5.20054	0	48.2017	44.0334	40.285	45.2458	48.9839	43.1668	46.0487	36.68
SP_0720	ABC transporter, ATP-binding protein	72.2748	2.10498	138.494	29.2653	35.6461	61.8764	63.2918	74.188	44.9287	56.9727	39.9434
SP_0721	conserved hypothetical protein	40.4935	0	0	27.6919	50.5945	72.2023	68.6917	85.5547	39.4793	63.8013	39.6988
SP_0722	transcriptional activator TenA	49.4512	0	27.6989	52.0272	0	65.9185	65.5773	78.9958	38.5207	65.3865	50.7974
SP_0723	conserved domain protein	50.212	0	18.2813	60.0915	31.3686	83.7684	96.5661	97.771	67.0456	99.8071	79.5197
SP_0724	hydroxyethylthiazole kinase, putative	114.757	0	55.7078	44.8444	76.812	103.504	94.4223	113.051	69.7535	97.0108	80.6858
SP_0725	thiamine-phosphate pyrophosphorylase	0	0	0	106.798	71.5456	109.109	111.394	117.444	74.9834	100.148	85.4387
SP_0726	phosphomethylpyrimidine kinase	178.072	278.12	125.222	119.5	93.571	881.775	947.05	803.077	1269.73	890.535	1393.06
SP_0727	transcriptional repressor, putative	32.7877	58.0597	0	89.6887	20.4832	8.22235	15.7939	12.4718	11.8916	20.0331	15.8769
SP_0728	hypothetical protein	28.3455	62.742	0	145.383	22.1351	16.5661	25.9516	23.3043	25.7012	36.7605	34.3458
SP_0729	cation-transporting ATPase, E1-E2 family	0	11.7701	3.22665	97.7282	56.0577	24.2345	28.74	27.0434	24.4115	27.459	38.0546
SP_0730	pyruvate oxidase	4644.4	5381.61	2467.87	1461.68	1541.6	3787.28	4873.54	3554.37	8631.92	7300.64	8906.97
SP_0731	conserved domain protein	530.256	335.345	147.091	51.803	165.631	133.49	208.927	164.387	622.314	484.472	523.724
SP_0733	hypothetical protein	138.224	76.4888	83.8747	84.3981	169.619	20.9406	25.3717	21.0121	40.0488	38.2903	43.2807
SP_0734	hypothetical protein	329.516	0	0	46.9465	0	28.1284	68.1368	62.6708	98.2815	161.513	182.984
SP_0736	mannose-6-phosphate isomerase	251.06	117.318	284.375	200.305	139.416	165.082	184.002	177.834	294.533	344.436	345.892
SP_0737	sodium-dependent transporter	101.549	34.4045	45.272	31.8882	84.155	36.3624	33.7328	35.3144	67.1232	165.249	88.2072
SP_0738	conserved domain protein	0	0	0	39.5339	108.345	30.4198	42.0414	32.0104	69.3557	132.341	97.8496
SP_0739	transcriptional regulator, MerR family	78.2657	70.8705	43.1744	133.807	33.337	112.017	122.344	110.381	113.424	138.781	151.793
SP_0740	MutT/nudix family protein	430.683	243.125	182.412	108.718	99.3166	191.266	174.751	182.515	179.431	189.222	211.073
SP_0741	conserved hypothetical protein	174.845	101.716	59.8494	168.624	140.038	106.587	107.384	115.369	110.728	121.519	124.729
SP_0742	conserved hypothetical protein	339.643	368.998	113.448	149.163	107.065	133.119	217.269	197.984	1110.09	712.693	498.544
SP_0743	transcriptional regulator, TetR family	0	0	126.134	48.4609	22.1351	27.8912	46.8407	47.382	88.4435	112.132	107.444
SP_0744	cytidine and deoxycytidylate deaminase family protein	123.921	0	13.6719	0	61.5809	29.7595	44.1865	43.3942	75.9103	96.8782	93.0552
SP_0745	uracil phosphoribosyltransferase	1004.24	1009.55	837.891	443.532	385.572	485.021	578.125	482.126	833.737	1022.06	939.319
SP_0746	ATP-dependent Clp protease, proteolytic subunit	847.487	824.404	747.026	442.298	466.747	370.475	645.929	593.599	1094.63	1255.92	1849.23
SP_0747	hypothetical protein	865.396	103.144	323.154	91.0477	623.807	77.8669	159.709	159.365	275.363	521.885	520.103
SP_0748	conserved hypothetical protein	571.691	527.259	282.662	361.997	363.762	109.122	167.861	169.492	354.919	483.143	426.135
SP_0749	branched-chain amino acid ABC transporter, amino acid-binding protein	331.503	593.049	551.115	477.471	244.687	151.838	142.304	146.541	340.019	348.639	331.147
SP_0750	branched-chain amino acid ABC transporter, permease protein	212.102	274.983	242.7	217.573	175.096	40.5687	45.2058	59.4228	117.602	136.28	107.437
SP_0751	branched-chain amino acid ABC transporter, permease protein	457.26	315.529	127.033	277.852	219.408	59.2666	62.1602	84.1678	144.125	149.628	129.753
SP_0752	branched-chain amino acid ABC transporter, ATP-binding protein	416.956	411.883	112.914	347.588	252.947	73.3651	81.651	104.761	195.393	202.529	195.631
SP_0753	branched-chain amino acid ABC transporter, ATP-binding protein	687.767	381.614	292.475	278.906	370.599	92.679	103.147	128.981	258.997	292.159	263.189
SP_0754	acetoin utilization protein AcuB, putative	300.928	253.117	77.911	178.354	43.8659	54.1645	72.3432	63.4255	353.677	314.203	371.332
SP_0755	peptide chain release factor 2, authentic frameshift	475.968	688.855	577.637	438.167	571.823	113.914	106.086	92.3755	237.273	206.453	233.483
SP_0755	peptide chain release factor 2, authentic frameshift	729.252	866.98	287.711	815.023	495.021	653.016	596.244	614.727	449.463	397.113	439.106
SP_0756	cell division ABC transporter, ATP-binding protein FtsE	810.239	1353.5	258.523	1053.55	617.866	897.071	936.149	1053.36	783.847	709.517	892.528
SP_0757	cell division ABC transporter, permease protein FtsX	625.619	985.09	403.785	753.574	577.374	890.61	888.775	1043.93	892.586	718.847	1068.79
SP_0758	PTS system, IIABC components	791.685	845.42	205.36	816.235	1017.48	1147.65	881.264	720.01	1311.08	973.688	1342.68
SP_0759	hypothetical protein	43.9355	340.375	106.641	225.343	137.237	236.792	164.1	154.324	128.316	93.2579	155.3
SP_0760	hypothetical protein	30.6973	0	0	72.1622	71.9148	154.452	94.714	92.8405	54.8248	42.627	67.0973
SP_0761	ATP-dependent RNA helicase, DEAD/DEAH box family	407.972	434.152	452.271	348.745	208.307	344.669	313.166	330.722	462.972	457.797	478.461
SP_0762	S-adenosylmethionine synthetase	424.968	281.707	397.552	295.16	89.8784	182.361	270.001	235.174	703.183	633.633	526.172
SP_0763	hypothetical protein	0	0	0	34.9369	95.7471	33.2666	24.7686	28.8294	71.1894	58.5775	38.6622
SP_0764	dihydroorotate dehydrogenase A	684.38	754.311	563.965	702.993	738.971	646.293	818.975	689.182	913.76	827.795	856.115
SP_0765	conserved hypothetical protein	782.204	899.423	456.151	820.613	741.717	801.438	909.303	807.902	803.292	744.675	775.606
SP_0766	superoxide dismutase, manganese-dependent	1178.86	1213.22	221.728	148.741	190.23	359.179	599.483	523.903	3102.22	2580.47	2829.05
SP_0767	conserved hypothetical protein	739.966	193.363	299.342	474.406	385.228	144.678	216.522	241.436	219.501	355.33	260.751
SP_0768	conserved hypothetical protein	423.577	376.105	220.941	464.796	288.123	303.765	333.091	350.981	346.646	402.439	331.311
SP_0769	VanZF-related protein	307.548	443.703	366.578	366.182	377.403	205.163	210.296	259.806	238.785	277.84	213.307
SP_0770	ABC transporter, ATP-binding protein	347.039	529.767	211.622	429.642	341.759	387.143	345.37	384.859	403.565	425.263	330.322
SP_0771	peptidyl-prolyl cis-trans isomerase, cyclophilin-type	334.434	413.676	198.957	224.222	133.141	119.126	171.192	153.008	348.908	326.318	365.428
SP_0772	hypothetical protein	0	0	0	0	0	19.1688	16.0658	17.1726	12.8267	20.6998	17.1536
SP_0773	hypothetical protein	106.51	0	0	91.0477	0	0.339536	1.80071	0.641051	5.20991	4.62196	6.34129
SP_0774	hypothetical protein	50.212	0	0	42.9225	0	0.640268	1.50191	0.725304	5.45135	6.53677	7.52902
SP_0775	ribosomal protein S16	1448.42	2254.92	1957.03	495.259	799.295	317.795	414.657	452.153	2467.81	2268.9	1939.87
SP_0776	KH domain protein	1235.69	2686.53	3665.78	751.143	617.569	337.074	290.546	356.721	2352.78	1554.55	1713.53
SP_0777	hypothetical protein	365.306	182.116	127.809	388.231	323.819	443.208	402.455	476.749	370.287	387.767	362.864
SP_0778	16S rRNA processing protein RimM	673	421.604	49.3136	399.452	285.581	582.255	563.319	634.274	385.618	425.23	441.709
SP_0779	tRNA (guanine-N1)-methyltransferase	377.113	668.594	373.243	594.655	371.685	852.226	713.708	870.445	454.017	462.422	490.346
SP_0780	ribonucleoside-diphosphate reductase, alpha subunit, truncation	692.081	748.739	1793.07	704.612	655.825	780.56	654.951	705.331	422.489	398.762	461.324
SP_0781	hypothetical protein	406.506	0	358.791	393.122	474.559	387.696	534.041	470.979	1009.42	1034.52	1148.01
SP_0782	conserved hypothetical protein	900.678	1312.88	573.194	225.343	343.094	320.221	329.514	332.605	309.941	325.313	351.144
SP_0783	conserved hypothetical protein	142.361	168.422	0	33.5706	15.3338	51.6835	52.7583	51.8349	164.407	183.273	97.054
SP_0784	glutathione reductase	93.9378	69.3096	133.004	220.826	213.956	456.24	797.659	552.576	1330.64	1160.68	1774.79
SP_0785	conserved hypothetical protein	210.89	432.763	85.3126	82.6258	188.702	41.8962	68.3939	75.4059	143.36	134.505	41.9881
SP_0786	ABC transporter, ATP-binding protein	377.395	301.309	141.276	224.701	410.539	69.2233	83.6653	93.6412	199.632	151.538	66.6904
SP_0787	conserved hypothetical protein	418.433	400.578	248.828	379.148	287.545	74.5201	101.335	116.059	213.282	165.515	71.0274
SP_0788	methionyl-tRNA synthetase	1026.48	975.421	1463.51	1294.76	1191.04	2268.57	1667.71	1793.91	1386.67	1368.36	1508.99
SP_0789	conserved hypothetical protein	90.3347	118.154	0	140.401	153.911	79.2357	126.707	155.754	154.056	217.363	127.448
SP_0790	conserved domain protein	145.375	125.138	7.84123	60.7542	80.7279	90.2142	114.679	154.056	110.029	153.101	110.259
SP_0791	oxidoreductase, aldo/keto reductase family	190.529	217.16	144.949	126.406	97.7095	83.3281	95.1187	117.919	146.808	139.141	171.84
SP_0792	hypothetical protein	394.926	267.711	119.821	50.6389	138.779	72.8934	129.067	129.923	142.197	159.869	171.294
SP_0793	oxidoreductase, short chain dehydrogenase/reductase family	137.652	150.258	50.3454	167.637	94.2403	105.138	138.17	139.675	136.599	128.734	133.355
SP_0794	MutT/nudix family protein	199.946	133.937	63.8567	233.889	147.921	101.044	135.954	132.73	129.918	131.44	145.24
SP_0795	PEP-utilizing enzymes family protein	197.295	99.085	88.5319	215.422	201.972	122.448	177.632	182.425	151.878	181.796	191.729
SP_0796	conserved hypothetical protein	113.575	172.007	232.143	235.052	130.702	116.874	160.763	155.451	140.605	177.189	189.333
SP_0797	aminopeptidase N	1444.85	1177.54	727.267	946.671	897.135	1159.91	1019.35	965.92	1703.46	1397.69	1606.19
SP_0798	DNA-binding response regulator CiaR	536.989	838.512	222.761	260.396	164.685	621.205	663.164	642.05	666.388	618.097	484.318
SP_0799	sensor histidine kinase CiaH	432.444	607.54	306.742	259.946	265.223	1216.47	977.747	1018.24	837.859	686.316	623.215
SP_0800	hypothetical protein	1272.3	1387.84	1821.78	688.548	1586.81	462.972	537.666	573.16	597.29	978.155	1235.55
SP_0801	conserved hypothetical protein	233.83	313.271	289.752	298.774	207.586	166.135	152.944	168.764	346.979	351.887	323.576
SP_0802	DNA polymerase III, epsilon subunit/ATP-dependent helicase DinG	126.913	184.501	167.075	318.11	275.483	145.396	171.327	182.003	175.756	209.875	185.024
SP_0803	rod shape-determining protein RodA, putative	178.757	196.645	162.052	320.34	272.457	191.56	190.717	235.273	165.771	170.661	158.666
SP_0804	4-methyl-5(b-hydroxyethyl)-thiazole monophosphate biosynthesis protein, putative	180.492	299.635	184.46	308.578	333.821	248.159	321.034	393.111	240.925	283.99	263.599
SP_0805	hydrolase, haloacid dehalogenase-like family	151.819	249.49	173.082	235.961	215.556	131.093	145.483	157.342	151.905	185.996	134.903
SP_0806	DNA gyrase subunit B	364.211	554.43	248.116	467.584	323.534	378.663	377.233	403.595	339.829	371.095	349.099
SP_0807	septation ring formation regulator EzrA, putative	868.031	980.942	477.662	769.4	740.987	661.939	626.738	700.404	886.354	840.277	949.499
SP_0809	hypothetical protein	54.9194	0	33.3252	140.839	42.8867	81.7009	105.133	98.6338	150.305	227.97	244.018
SP_0810	hypothetical protein	29.6194	87.4158	0	135.037	92.5196	111.921	98.1999	74.9209	143.139	97.9291	146.954
SP_0811	transposase family protein	36.1822	11.4412	0	114.881	129.165	75.2252	61.3055	52.4636	66.1562	58.9591	89.0391
SP_0815	hypothetical protein	312.173	499.046	505.14	1660.42	1227.91	1483.64	1364.21	1243.9	1571.18	1625.93	1835.33
SP_0816	hypothetical protein	782.052	223.675	767.813	991.509	631.292	854.582	1031.54	874.324	1268.49	1744.01	1847.28
SP_0817	MutT/nudix family protein	31.1599	0	60.5054	117.2	19.4663	29.7202	29.7278	29.8266	22.543	32.1121	29.7101
SP_0818	IS630-Spn1, transposase Orf1	0	0	0	77.0403	23.4594	29.5919	35.0836	33.5221	63.402	75.6477	86.2487
SP_0819	IS630-Spn1, transposase Orf2	0	0	325.847	55.6402	127.072	30.225	35.7217	37.1774	59.4834	62.5835	87.4797
SP_0820	ATP-dependent Clp protease, ATP-binding subunit ClpE	105.025	145.94	167.113	217.462	160.384	1568.27	1374.74	1140.59	601.859	581.798	1858.83
SP_0821	hypothetical protein	374.744	200.221	784.123	353.479	242.184	57.6712	85.1017	79.6412	231.004	213.022	189.316
SP_0822	conserved hypothetical protein	1186.83	1338.77	4653.41	604.817	320.815	184.853	498.538	446.282	955.484	1659.32	1295.74
SP_0823	amino acid ABC transporter, permease protein	168.101	122.62	41.729	32.6584	71.6022	46.6537	51.0563	72.6802	107.86	160.236	104.21
SP_0824	amino acid ABC transporter, ATP-binding protein	168.569	67.4796	95.759	73.5814	67.2184	46.9987	46.3072	61.9789	145.911	152.56	137.942
SP_0825	methylenetetrahydrofolate dehydrogenase/methenyltetrahydrofolate cyclohydrolase	55.3034	115.612	0	36.7692	86.3732	33.3921	37.8947	47.8126	58.2816	98.7981	70.4587
SP_0826	hypothetical protein	51.3115	49.6898	0	76.7592	30.052	102.723	89.9524	106.854	118.225	135.125	123.512
SP_0828	ribose 5-phosphate isomerase	466.333	345.494	0	250.381	252.806	336.403	418.629	410.049	497.868	692.018	436.575
SP_0829	phosphopentomutase	252.303	272.011	68.6302	293.764	271.757	551.887	591.268	551.069	542.8	602.353	491.281
SP_0830	hypothetical protein	415.081	177.307	141.402	522.895	272.958	770.813	788.337	766.712	613.943	697.159	504.08
SP_0831	purine nucleoside phosphorylase, family 2	178.996	360.185	130.339	333.841	127.072	536.691	573.443	517.648	391.55	549.815	394.757
SP_0832	hypothetical protein	200.408	1211.36	74.8356	658.898	722.302	1044.46	1140.03	995.978	721.844	956.738	724.328
SP_0833	hypothetical protein	319.055	420.645	84.6355	304.034	392.107	752.923	668.058	551.281	451.217	563.217	422.492
SP_0834	hemolysin-related protein	195.269	301.418	106.017	219.633	296.947	780.484	751.118	631.894	446.113	584.971	442.048
SP_0835	purine nucleoside phosphorylase, family 1	506.092	496.509	35.9969	247.212	277.949	454.617	453.148	442.392	344.969	592.042	325.519
SP_0836	IS1167, transposase	25.1659	30.173	0	0	0	9.2793	8.65112	7.55308	9.22736	14.0616	12.4673
SP_0837	DNA topology modulation protein FlaR, putative	110.466	22.2286	0	120.183	94.1057	112.709	80.0843	88.5596	105.265	131.482	85.3879
SP_0838	ribosomal protein S20	13091.7	11682.3	12000.5	931.798	2084.62	538.913	1089.47	961.227	3286.04	4761.63	5325.16
SP_0839	pantothenate kinase	137.388	47.5163	17.3682	112.549	17.8811	23.3948	28.0366	30.6502	88.1286	99.4497	97.8149
SP_0840	hypothetical protein	38.9302	0	0	0	34.7437	4.58589	5.55466	5.35562	9.81986	9.70862	14.3727
SP_0841	conserved hypothetical protein	107.051	128.35	75.7853	167.768	125.395	99.9512	110.261	106.611	98.3627	110.76	108.664
SP_0842	pyrimidine-nucleoside phosphorylase	312.499	213.448	25.033	285.646	286.717	219.07	193.131	194.603	140.064	137.937	148.214
SP_0843	deoxyribose-phosphate aldolase	614.302	642.466	540.442	604.993	490.577	619.182	568.523	556.857	411.138	488.138	366.621
SP_0844	cytidine deaminase	780.7	347.856	648.048	1028.49	633.404	892.698	777.425	771.854	721.804	798.458	593.298
SP_0845	lipoprotein	841.158	1364.55	1020.83	1592.17	1384.1	1135.53	1065.23	1068.08	1200.83	1155.88	855.488
SP_0846	sugar ABC transporter, ATP-binding protein	506.288	324.8	433.228	240.601	273.403	240.098	215.32	219.034	236.4	248.091	185.61
SP_0847	sugar ABC transporter, permease protein, putative	479.183	462.833	226.574	383.019	264.367	329.613	330.473	299.606	346.741	302.629	260.892
SP_0848	sugar ABC transporter, permease protein, putative	407.677	442.046	213.95	485.064	430.211	474.355	413.326	409.658	481.223	370.827	295.72
SP_0851	conserved hypothetical protein	246.367	218.131	79.7314	294.841	179.563	233.274	263.581	236.339	457.192	417.539	349.332
SP_0852	topoisomerase IV, subunit B	229.848	258.133	120.135	285.156	152.486	72.4559	90.0237	85.3696	107.319	120.708	111.419
SP_0853		463.764	351.181	740.561	542.492	876.795	143.275	151.859	174.644	255.678	219.103	258.026
SP_0854	hypothetical protein	397.512	879.881	558.594	858.449	326.756	172.783	222.348	214.871	279.856	259.603	283.538
SP_0855	topoisomerase IV, subunit A	358.842	192.966	216.129	413.858	404.717	156.213	166.781	136.042	170.767	160.563	174.381
SP_0856	branched-chain amino acid aminotransferase	761.463	767.163	587.931	559.503	454.775	181.06	221.219	192.75	304.921	295.899	295.108
SP_0858	membrane protein, putative	1128.95	414.37	403.38	1136.51	978.563	295.333	336.03	308.343	395.542	379.132	381.525
SP_0859	membrane protein	512.105	239.968	221.591	902.347	806.493	186.636	217.302	206.602	312.091	249.656	282.665
SP_0860	pyrrolidone-carboxylate peptidase	1025.84	719.198	803.526	1041.12	1129.82	261.964	302.623	318.285	395.306	365.086	378.186
SP_0861	hypothetical protein	924.357	1199.84	1661.93	351.184	374.284	60.8255	134.162	163.303	302.139	424.692	309.113
SP_0862	ribosomal protein S1	8480.32	8289.29	4007.67	1959.34	2019.2	941.362	906.214	1105.41	2028.26	2054.79	1949.24
SP_0864	conserved hypothetical protein	232.911	281.205	25.6966	452.496	496.039	123.904	203.741	222.558	209.465	274.15	263.446
SP_0865	DNA polymerase III, gamma and tau subunits	293.699	468.633	268.534	386.458	447.513	169.708	267.272	299.316	295.122	340.078	354.31
SP_0866	hypothetical protein	561.022	1189.44	1230.47	1248.05	865.652	128.768	218.425	261.667	405.206	439.003	463.478
SP_0867	ABC transporter, ATP-binding protein	865.033	836.275	157.679	169.519	117.48	114.096	223.678	183.346	835.944	540.373	765.23
SP_0868	conserved hypothetical protein	847.402	866.242	395.153	221.239	277.083	215.71	354.911	306.115	1020.82	619.456	934.63
SP_0869	aminotransferase, class-V	774.511	829.835	297.238	209.365	255.013	248.366	420.009	365.03	871.847	570.675	893.852
SP_0870	NifU family protein	753.18	1293.36	174.107	541.641	438.786	222.569	400.509	343.627	781.474	549.503	911.312
SP_0871	conserved hypothetical protein	843.263	998.31	350.941	398.696	457.458	223.063	411.945	325.585	853.947	601.854	1101.05
SP_0872	D-alanyl-D-alanine carboxypeptidase	244.086	246.649	453.352	116.119	185.635	73.462	113.712	98.3336	263.35	243.481	309.887
SP_0873	membrane protein	192.366	173.473	138.345	121.807	200.293	83.6213	97.8322	134.818	287.097	240.565	250.382
SP_0874	hypothetical protein	1403.5	1175.1	325.847	0	0	20.4382	22.6012	17.2763	27.2567	26.7523	26.3731
SP_0875	lactose phosphotransferase system repressor	1328.74	1285.51	86.3488	66.9034	122.236	107.133	143.349	126.072	37.4855	143.35	165.38
SP_0876	1-phosphofructokinase, putative	1267.48	1313.2	133.301	69.1842	135.432	202.716	293.372	223.433	54.3618	206.668	278.443
SP_0877	PTS system, fructose specific IIABC components	1013.69	900.049	55.6956	78.4604	126.486	273.944	345.579	224.155	106.779	304.172	550.318
SP_0878	spoE family protein	181.92	219.066	294.373	289.503	250.172	300.995	241.853	235.368	226.288	229.332	236.808
SP_0879	hypothetical protein	19.7463	109.27	215.678	135.037	185.039	875.183	1077.35	1016.21	414.293	728.397	588.796
SP_0880	aminotransferase, class-V	234.092	239.935	128.753	145.891	176.5	153.268	174.395	162.652	299.356	350.309	304.801
SP_0881	thiazole biosynthesis protein ThiI	201.778	252.13	105.324	148.374	162.652	181.793	185.99	196.451	306.611	306.211	352.254
SP_0882	conserved hypothetical protein	12.7812	45.9728	0	0	9.98091	2.86568	4.12223	4.09247	10.8722	11.5681	12.1048
SP_0883	hypothetical protein	0	0	0	80.4796	24.5067	5.70239	6.40759	8.61298	19.4691	19.9216	19.8952
SP_0884	hypothetical protein	0	71.5074	0	0	0	5.62981	5.91544	8.15078	17.2051	16.5983	16.5267
SP_0885	hypothetical protein	22.5889	42.5	0	15.4477	21.1677	4.85825	5.42882	7.23284	16.8812	14.6643	16.1584
SP_0886	type I restriction-modification system, M subunit, putative	54.6988	50.7731	4.28276	78.4326	101.964	32.7291	64.4532	56.8713	104.691	96.5551	147.375
SP_0887	type I restriction-modification system, S subunit, putative	44.6403	36.4038	17.1081	116.487	205.489	62.8741	107.969	104.167	127.863	123.22	188.436
SP_0888	hypothetical protein	528.338	400.079	121.489	304.261	416.924	292.74	393.108	408.955	536.801	529.726	769.896
SP_0889	hypothetical protein	305.638	119.801	239.555	239.495	228.729	213.079	206.358	210.443	361.57	278.176	438.575
SP_0890	integrase/recombinase, phage integrase family	19.1024	3.02019	19.8709	0	0	2.25022	4.20193	3.56082	4.9096	5.98189	7.31721
SP_0891	type I restriction-modification system, S subunit, putative	0	0	0	27.3143	12.4761	18.2331	30.2726	26.4434	36.5393	34.2091	57.3006
SP_0892	type I restriction-modification system, R subunit, putative	203.584	159.412	148.438	198.104	163.378	113.377	164.126	142.833	131.184	140.173	185.103
SP_0893	transcriptional repressor, putative	307.828	501.736	122.263	1243.93	620.628	774.385	1040.18	843.277	902.932	1068.64	1143.66
SP_0894	X-pro dipeptidyl-peptidase	166.932	325.878	241.982	509.35	427.283	266.464	454.202	377.374	392.731	483.307	522.645
SP_0895	DNA polymerase III, alpha subunit	200.511	124.01	181.995	224.695	177.632	592.724	510.035	468.283	182.738	178.488	195.831
SP_0896	6-phosphofructokinase	1786.19	1710.56	825.196	1475.46	1200.83	1198.9	1372.04	1218.49	862.918	974.315	882.964
SP_0897	pyruvate kinase	2636.13	2582.36	2865.7	2280.36	2184.32	2387.11	2292.57	2038.66	1531.62	1374.21	1606.17
SP_0899	conserved hypothetical protein	283.844	287.406	84.2865	722.75	584.792	355.149	436.666	357.245	377.026	376.212	472.459
SP_0901	hypothetical protein	337.965	392.741	20.5078	982.264	1016.09	508.054	485.539	466.664	383.57	380.431	542.942
SP_0902	hypothetical protein	189.345	101.726	258.793	773.143	913.002	461.565	438.569	414.809	361.47	346.44	459.936
SP_0904	conserved hypothetical protein	287.519	271.728	415.585	502.603	403.64	672.474	614.248	632.09	789.212	762.078	997.231
SP_0905	conserved hypothetical protein	531.008	565.145	233.056	338.263	227.214	346.764	430.796	395.663	591.734	694.485	765.397
SP_0906	hypothetical protein	1697.51	1547.16	1260.3	512.143	93.571	187.339	335.762	257.703	723.829	869.588	1084.36
SP_0907	capsular polysaccharide biosynthesis protein, putative	142.598	132.226	60.8039	59.3008	81.259	50.0198	54.2007	51.3744	105.211	97.4494	146.885
SP_0908	transcriptional regulator, putative	314.974	287.641	555.733	626.305	568.279	705.38	579.187	542.037	424.479	353.544	520.842
SP_0909	conserved hypothetical protein	369.058	486.25	725.157	871.326	997.259	1504.02	1218.3	1226.8	685.584	662.509	853.843
SP_0910	conserved hypothetical protein	231.748	534.341	1570.31	544.785	1251.73	1097.53	1055	933.457	1289.48	1288.72	1026.3
SP_0911	hypothetical protein	164.758	136.758	0	117.366	42.8867	386.095	366.182	172.146	392.143	326.157	363.182
SP_0912	ABC transporter, ATP-binding protein	6.94632	365.168	177.032	380.025	238.674	37.8657	42.0426	31.4896	58.5908	50.9334	71.3012
SP_0913	ABC transporter, permease protein, putative	34.4592	210.488	41.8199	215.26	153.176	61.009	51.9083	41.4479	55.7279	47.6931	67.9013
SP_0915	IS1239, transposase, putative	5.29343	8.78766	0	18.0998	8.26732	17.797	17.8573	19.9058	24.7306	28.7329	46.1759
SP_0916	lysine decarboxylase	185.744	187.78	80.1973	67.1754	13.9469	47.3011	65.9361	66.8695	374.367	180.151	696.588
SP_0917	pilin gene inverting-related protein	224.273	256.35	89.2391	56.5715	114.843	86.9497	84.7456	101.985	385.332	186.512	707.562
SP_0918	spermidine synthase	110.221	172.814	37.157	115.158	105.199	96.4566	139.822	140.682	383.421	238.163	801.147
SP_0919	conserved hypothetical protein	182.018	74.0953	71.0938	160.959	114.365	113.016	149.298	148.395	346.011	239.889	788.84
SP_0920	carboxynorspermidine decarboxylase	295.63	281.922	96.4304	131.85	153.297	196.758	216.71	205.887	372.728	291.918	734.841
SP_0921	conserved hypothetical protein	291.285	209.544	217.995	232.398	181.972	222.268	234.044	243.373	409.535	355.321	720.472
SP_0922	carbon-nitrogen hydrolase family protein	216.668	554.525	138.779	318.979	220.896	173.609	172.994	190.827	354.323	304.273	562.307
SP_0923	Cof family protein	52.0717	104.454	134.288	200.305	86.4088	194.892	193.27	167.671	327.5	283.228	480.055
SP_0924	hypothetical protein	53.4351	0	0	81.2047	185.456	30.7877	69.3683	66.6659	139.967	194.631	144.326
SP_0925	conserved hypothetical protein	101.993	39.0737	9.52149	93.8929	79.6467	55.2731	74.1363	66.8451	127.541	116.961	107.468
SP_0926	hypothetical protein	186.393	235.758	16.1577	68.2857	145.555	9.0543	22.8551	21.8599	24.5883	52.7563	43.3321
SP_0927	transcriptional regulator, LysR family	227.653	266.395	49.2729	302.441	294.404	144.379	166.458	165.984	160.648	175.795	161.788
SP_0928	lipoprotein signal peptidase	302.413	315.747	27.6989	214.612	311.903	246.552	253.929	251.109	189.082	181.218	174.159
SP_0929	ribosomal large subunit pseudouridine synthase D	192.96	243.125	129.698	370.496	222.547	298.249	290.847	284.216	222.077	193.659	207.822
SP_0930	choline binding protein E	376.39	329.845	103.584	318.159	240.384	280.48	301.811	336.959	274.898	242.207	272.648
SP_0931	glutamate 5-kinase	89.0584	21.027	103.759	190.831	111.274	86.0742	100.093	100.147	102.114	108.145	102.107
SP_0932	gamma-glutamyl phosphate reductase	203.502	112.034	73.458	103.483	169.509	176.383	179.92	182.564	200.763	182.533	214.334
SP_0933	pyrroline-5-carboxylate reductase	297.308	263.233	136.308	129.897	227.009	240.072	226.747	233.847	258.411	225.854	263.967
SP_0934		0	0	0	45.5238	41.5871	13.4683	18.6996	19.1033	18.0441	26.8073	25.8349
SP_0935	thymidylate kinase	391.913	173.498	80.1057	183.378	154.634	94.1966	107.666	100.788	111.626	94.2154	98.6637
SP_0936	DNA polymerase III, delta prime subunit	192.31	271.776	122.08	237.736	170.969	139.751	148.935	141.886	139.552	131.924	123.342
SP_0937	conserved hypothetical protein	356.458	50.4599	20.1209	226.76	90.6285	135.055	176.631	179.416	191.668	210.245	209.153
SP_0938	tetrapyrrole methylase family protein	177.257	224.681	91.9317	139.868	104.111	109.072	122.283	125.601	137.137	137.843	138.466
SP_0939	conserved hypothetical protein	121.902	129.292	0	121.572	103.126	99.3094	108.648	123.651	98.3861	139.3	116.123
SP_0941	IS1381, transposase OrfB	23.6576	0	16.4063	46.2242	0	10.8599	21.0267	17.8025	31.3533	36.6394	42.1506
SP_0942	IS1381, transposase OrfA	151.957	0	32.0724	0	0	17.6635	34.6779	30.4437	54.9864	69.2996	68.7052
SP_0943	Gid protein	115.367	168.113	121.342	19.7237	54.0541	49.894	86.7094	77.4716	234.222	150.608	253.781
SP_0944	uridylate kinase	882.253	1074.46	602.004	654.222	442.701	802.054	810.601	844.687	1049.77	935.882	967.558
SP_0945	ribosome recycling factor	864.537	998.643	705.205	823.835	730.457	1314.54	994.713	1118.36	1147.4	886.072	1147.74
SP_0946	conserved hypothetical protein	286.737	641.509	37.4178	263.559	216.691	282.096	258.864	249.922	312.779	287.862	343.046
SP_0947	conserved hypothetical protein	274.597	891.459	177.735	584.223	324.033	347.553	330.955	302.688	405.939	328.775	430.043
SP_0948	PhoH family protein	648.831	514.853	297.141	558.125	284.672	444.164	467.277	416.584	498.151	420.107	594.566
SP_0950	acetyltransferase, GNAT family	547.221	818.182	357.598	674.68	1019.01	709.452	675.8	686.578	661.193	579.959	787.09
SP_0951	conserved hypothetical protein	1855.7	1497.14	3325.51	1205.78	1859.93	1995.02	2116.32	1759.9	1103.9	1174.32	1399.32
SP_0953	acetyltransferase, GNAT family	226.615	117.724	246.957	94.8813	122.791	52.9766	64.6679	74.9544	117.855	132.272	148.625
SP_0954	competence protein CelA	305.726	0	78.6291	0	0	6.07566	7.62539	8.44238	6.97603	14.0776	7.98262
SP_0955	competence protein CelB	386.421	1.30187	14.2759	4.02219	0	6.07483	7.04929	8.13904	7.42677	12.2743	6.93599
SP_0956	hypothetical protein	1241.35	0	0	429.225	108.919	103.984	106.875	90.9316	228.438	284.297	182.259
SP_0957	ABC transporter, ATP-binding protein	1037.86	444.076	97.9354	283.595	182.05	122.432	103.198	70.0048	176.741	152.48	124.937
SP_0958	hypothetical protein	763.032	297.905	40.4965	152.13	208.462	203.973	125.084	111.611	143.306	127.734	113.755
SP_0959	translation initiation factor IF-3	2310.16	3220.75	613.471	468.455	287.756	282.206	364.944	392.84	1851.95	1881.37	2213.55
SP_0960	ribosomal protein L35	3836.16	3621.48	763.993	1143.53	471.114	880.265	1209.14	1180.94	4919.61	4628.42	5783.64
SP_0961	ribosomal protein L20	3943.21	3602.3	1697.36	613.434	583.259	624.662	757.913	733.751	3808.82	2913.8	4538.61
SP_0962	lactoylglutathione lyase	951.359	1026.1	167.938	82.8032	108.061	45.9069	52.1168	53.2032	489.004	284.53	593.49
SP_0963	dihydroorotate dehydrogenase, electron transfer subunit	66.5159	89.1136	12.7459	119.704	21.8705	37.9144	42.3776	58.2892	173.631	73.5972	112.69
SP_0964	dihydroorotate dehydrogenase B	85.6251	102.532	61.3269	76.7942	131.538	44.3653	43.6657	57.192	141.69	57.7937	115.13
SP_0965	endo-beta-N-acetylglucosaminidase	286.681	346.795	294.516	506.081	443.575	438.831	418.779	459.041	420.874	354.063	804.901
SP_0966	adherence and virulence protein A	74.8177	51.0915	142.96	149.684	89.5027	59.8801	95.1302	81.0087	126.53	129.977	140.983
SP_0967	conserved hypothetical protein TIGR00043	704.027	650.287	224.845	316.747	82.6732	240.923	347.866	278.732	730.627	711.195	733.306
SP_0968	diacylglycerol kinase	565.836	515.72	193.892	261.762	155.952	186.83	203.999	173.661	446.845	362.031	425.013
SP_0969	GTP-binding protein Era	522.832	282.025	284.375	170.259	210.431	239.843	293.978	271.965	502.447	449.86	537.404
SP_0970	formamidopyrimidine-DNA glycosylase	421.781	523.382	244.304	87.4058	239.542	263.901	299.46	278.842	343.534	354.665	354.971
SP_0971	kinase, putative	491.556	457.364	237.566	148.741	176.642	234.245	260.118	247.866	310.1	322.481	341.27
SP_0972	multi-drug resistance efflux pump	433.863	346.453	21.3281	60.0915	58.3259	104.867	114.584	120.571	189.12	172.494	172.332
SP_0973	ribosomal protein L33	1274.13	340.375	213.281	90.1372	54.895	76.3413	98.9169	132.344	242.879	222.86	221.896
SP_0974	preprotein translocase, SecG subunit, putative	1211.04	1857.73	1449.22	134.821	123.162	81.258	142.346	164.79	274.18	388.966	275.241
SP_0975	exoribonuclease, VacB/Rnb family	390.102	375.373	119.546	153.099	90.9089	51.8175	77.0203	86.2195	189.144	188.148	219.328
SP_0976	SsrA-binding protein	478.784	564.175	150.391	327.421	263.918	99.7888	150.902	176.886	423.797	406.285	496.352
SP_0977	tellurite resistance protein TehB	661.329	425.257	260.099	246.019	129.108	96.4827	135.538	157.783	402.24	383.612	473.737
SP_0978	competence protein CoiA	5.52648	0	6.70696	0	0	1.67953	0.991825	0.984558	0.93625	1.19224	1.53547
SP_0979	oligoendopeptidase F	356.747	424.761	211.152	272.461	114.174	368.605	335.761	347.359	369.545	267.003	375.175
SP_0980	O-methyltransferase	400.588	224.738	71.6912	195.676	126.858	399.477	348.704	381.922	382.564	242.501	421.814
SP_0981	protease maturation protein, putative	945.872	734.021	298.866	272.708	275.349	734.086	959.347	964.829	1677.51	1593.47	1503.91
SP_0984	phosphoglycerate mutase family protein	208.004	150.338	216.372	174.178	165.746	359.398	317.896	358.71	374.727	395.09	560.242
SP_0985	regulatory protein, putative	234.686	51.3432	185.462	205.281	102.289	231.285	223.412	226.973	304.76	310.869	449.599
SP_0986	conserved hypothetical protein	132.901	55.3737	60.7207	203.156	68.3745	174.61	161.954	168.906	233.857	245.311	307.895
SP_0987	hypothetical protein	102.022	156.62	223.666	112.531	71.9597	102.381	145.537	152.964	201.956	234.834	244.72
SP_0988	UDP-N-acetylglucosamine pyrophosphorylase	471.829	564.473	489.156	444.154	259.558	205.76	275.285	256.459	328.23	348.997	354.103
SP_0989	MutT/nudix family protein	564.885	320.605	527.344	660.346	444.891	343.857	453.938	441.25	523.27	521.026	586.906
SP_0990	hypothetical protein	882.497	796.444	73.5453	841.798	556.048	286.235	416.987	424.407	432.927	523.956	586.496
SP_0991	5-methylthioadenosine/S-adenosylhomocysteine nucleosidase	933.867	818.837	290.838	806.422	576.279	414.978	417.012	416.372	465.97	438.558	486.769
SP_0992	conserved hypothetical protein	1363.61	673.042	2516.46	1364.88	1271.96	391.595	596.546	578.529	648.051	833.677	850.141
SP_0993	exonuclease	267.627	192.525	10.8265	152.516	48.7646	51.3217	73.2524	77.467	91.317	137.482	116.709
SP_0994	hypothetical protein	162.338	34.6144	39.7643	61.11	51.1733	41.1535	54.5036	60.3662	107.115	117.425	122.188
SP_0995	IS630-Spn1, transposase Orf1	0	0	0	0	0	6.50387	5.20151	6.89351	10.3026	10.4062	7.61683
SP_0997	hypothetical protein	0	0	0	44.8444	0	117.231	83.37	94.2173	93.8809	102.897	120.537
SP_0998	hypothetical protein	0	116.7	0	120.183	0	85.0436	71.4451	73.2376	61.0132	82.3633	98.4696
SP_0999	cytochrome c-type biogenesis protein CcdA	119.147	123.623	72.2988	159.141	157.009	57.97	134.845	119.309	481.524	405.741	728.872
SP_1000	thioredoxin family protein	122.83	162.083	126.134	282.688	272.999	129.215	237.177	214.663	738.299	558.015	1148.01
SP_1001	amino acid permease family protein	293.535	222.166	78.1419	58.2784	70.9849	50.6948	66.861	75.8378	175.389	135.253	206.54
SP_1002	adhesion lipoprotein	57.432	76.2746	850.338	883.698	959.765	11.2291	10.0682	13.5224	36.7809	30.1204	30.28
SP_1003	conserved hypothetical protein	34.5207	43.9941	624.61	1303.77	1226.97	22.605	22.2184	28.5185	48.1586	39.3607	52.4863
SP_1004	conserved hypothetical protein	220.522	151.486	346.582	418.907	651.878	12.0917	12.4165	15.0931	103.846	76.1827	124.264
SP_1006	hypothetical protein	64.611	0	0	198.832	121.092	2.96595	2.21829	2.42657	14.985	12.3045	22.6245
SP_1007	hypothetical protein	20.9217	0	10.1563	92.9987	143.773	2.50772	1.67604	2.09532	13.3987	7.82337	19.0994
SP_1008	peptidase t	264.905	302.715	386.834	250.381	262.366	97.0524	201.259	122.365	357.647	304.996	390.259
SP_1009	ferrochelatase	105.927	0	111.023	115.244	180.477	66.1026	67.3631	57.2858	91.8745	87.9449	145.677
SP_1010	large conductance mechanosensitive channel protein MscL	292.903	509.405	186.198	47.6916	130.702	68.3249	131.653	126.424	527.13	534.216	745.49
SP_1011	GtrA family protein	12.2043	54.0278	0	0	19.0608	7.59948	9.87214	11.5469	14.4729	18.1577	20.5603
SP_1012	conserved hypothetical protein	108.547	194.5	100.368	88.3698	0	501.948	341.939	416.324	342.177	311.124	476.448
SP_1013	aspartate-semialdehyde dehydrogenase	330.434	260.056	323.784	171.57	225.543	65.1578	90.6947	104.029	210.894	247.329	184.91
SP_1014	dihydrodipicolinate synthase	484.417	489.367	666.505	481.502	629.005	290.328	332.835	329.267	318.52	321.503	241.221
SP_1016	thiophene and furan oxidation protein ThdF	120.871	99.7981	79.1656	52.4816	41.9503	99.252	152.471	137.875	265.261	265.086	390.645
SP_1017	4-oxalocrotonate tautomerase	1930.28	1259.47	1853.1	49.2553	44.9959	86.2088	230.424	142.603	394.587	509.296	315.927
SP_1018	thymidine kinase	399.813	204.225	159.961	458.197	96.0662	66.9854	93.6145	88.1305	128.757	140.562	133.792
SP_1019	acetyltransferase, GNAT family	340.5	243.125	673.17	347.404	111.505	66.131	87.9636	94.9581	121.686	137.79	124.128
SP_1020	peptide chain release factor 1	270.936	299.854	65.1693	287.938	163.923	132.226	168.633	173.363	177.577	184.748	173.524
SP_1021	HemK protein	246.353	272.647	460.84	295.092	318.587	81.6075	134.355	144.471	348.048	337.531	325.685
SP_1022	Sua5/YciO/YrdC family protein	753.494	957.913	991.759	848.792	741.082	288.595	364.79	387.787	1141.01	982.738	964.642
SP_1023	acetyltransferase, GNAT family	1372.98	1316.93	296.224	845.036	638.535	303.798	443.96	470.075	1142.25	996.01	1044.13
SP_1024	serine hydroxymethyltransferase	723.52	595.337	361.408	573.665	432.347	255.105	397.973	385.298	912.708	825.37	940.562
SP_1025	hypothetical protein	628.958	483.356	266.602	375.572	388.023	133.033	201.479	234.754	641.382	626.881	628.652
SP_1026	conserved hypothetical protein	535.799	564.525	52.0199	197.862	100.418	74.2242	127.52	137.144	269.826	310.47	284.007
SP_1027	conserved hypothetical protein	348.78	341.123	164.063	194.142	168.908	922.761	1157.21	1010.01	2019.85	1658.5	1207.63
SP_1028	RNA methyltransferase, TrmA family	595.255	62.742	0	0	309.891	514.934	406.084	376.417	1271.26	705.69	635.788
SP_1029	conserved hypothetical protein	159.912	132.289	215.634	49.708	35.3185	83.0877	86.6814	88.1342	147.815	133.659	181.352
SP_1030	conserved hypothetical protein	24.0742	0	204.516	123.476	131.598	14.0698	29.3672	29.6745	64.9107	63.0992	73.6825
SP_1031	hypothetical protein	232.6	0	188.19	88.3698	40.364	11.3145	12.772	21.6525	49.0868	41.2714	62.1177
SP_1032	iron-compound ABC transporter, iron compound-binding protein	828.608	1063.49	1041.46	619.364	509.625	252.106	415.869	396.83	1112.82	863.07	1269.58
SP_1033	iron-compound ABC transporter, permease protein	435.478	463.368	370.106	234.18	108.983	78.8942	128.768	140.032	269.435	257.882	295.954
SP_1034	iron-compound ABC transporter, permease protein	207.909	477.567	0	98.364	122.533	57.4574	86.4685	95.1332	149.488	161.707	203.657
SP_1035	iron-compound ABC transporter, ATP-binding protein	364.748	642.217	56.3385	90.7041	134.648	109.947	159.934	166.348	324.233	323.977	496.073
SP_1036	hypothetical protein	127.555	533.307	206.401	0	0	12.0481	24.6245	23.6114	116.737	94.748	166.51
SP_1037	type II restriction endonuclease, putative	75.318	319.536	0	85.8449	0	4.48188	9.79505	12.451	56.8498	44.8858	82.8192
SP_1038	hypothetical protein	659.032	972.501	0	0	0	8.90629	20.5696	24.8975	134.671	100.566	199.649
SP_1039	hypothetical protein	16.2724	0	0	55.6402	0	0.553318	2.20086	2.11547	5.51347	4.27714	6.53048
SP_1040	site-specific recombinase, resolvase family	23.5369	0	53.3204	77.797	63.7174	98.5879	130.894	107.307	74.8512	74.3791	98.4655
SP_1041	hypothetical protein	90.4554	38.1373	167.28	110.462	40.364	162.798	157.7	140.015	89.1086	72.0112	107.519
SP_1042	hypothetical protein	259.619	0	96.9461	227.619	41.5871	152.961	233.815	170.071	73.0023	89.2698	120.367
SP_1043	hypothetical protein	69.4632	149.911	25.2903	47.5031	0	68.7782	73.7687	66.8756	39.1324	33.1403	54.8046
SP_1044	hydrolase, putative	36.9983	44.3597	14.9671	31.6271	96.307	85.0115	95.9594	82.1841	45.4353	46.0861	79.5442
SP_1045	conserved hypothetical protein TIGR00147	71.4883	98.8984	36.1494	101.85	37.2169	79.6989	114.523	116.874	122.744	112.019	183.975
SP_1047	hypothetical protein	74.6074	0	0	113.38	25.8939	19.9429	40.8373	41.6308	91.5415	93.6114	154.241
SP_1048	hypothetical protein	168.264	0	0	63.9271	29.1995	22.3299	31.8026	36.9082	82.1271	68.9374	106.857
SP_1049	hypothetical protein	69.3718	0	140.317	0	0	26.9306	19.6073	24.7176	82.322	44.1518	101.98
SP_1050	transcriptional regulator, putative	27.6324	91.7453	0	94.4834	25.8939	80.0536	79.4898	73.2298	102.618	70.2189	135.926
SP_1051	conserved hypothetical protein	124.542	3.82874	33.5876	136.034	64.8366	145.867	170.046	172.886	107.987	80.1569	135.877
SP_1052	phosphoesterase, putative	47.4978	71.3417	57.6436	121.807	132.469	100.222	101.533	115.461	49.6078	43.8477	92.7362
SP_1053	conserved domain protein	0	293.294	0	238.458	239.621	187.041	189.407	196.336	90.4565	78.8217	152.856
SP_1054	Tn5252, Orf 10 protein	0	0	0	0	23.0651	0.470785	0.576179	0.248879	0.281906	0.402826	0.683864
SP_1055	Tn5252, Orf 9 protein	0	0	0	0	11.249	0.275525	0.412141	0.208079	0.378089	0.571521	0.476463
SP_1056	Tn5252, relaxase	0	0	0	0	0	0.632721	0.405979	0.612373	0.944882	1.25431	1.07079
SP_1057	transcriptional regulator PlcR, putative	614.185	844.629	479.699	332.686	104.471	5.06602	6.53229	9.61843	13.9295	15.8782	17.2575
SP_1058	hypothetical protein	25121.3	23037.5	15024.5	12318.7	14943.6	18.9235	30.9814	30.9329	50.5997	58.3951	46.5889
SP_1059	hypothetical protein	63444.9	46442.7	127448	52204.5	65351.2	217.335	209.396	242.523	205.274	178.931	174.847
SP_1060	hypothetical protein	3992.22	3660.9	389.649	1820.08	2084.95	1.54424	2.54922	4.06821	1.73379	4.44165	3.83797
SP_1061	protein kinase, putative	2337.68	2471.32	470.264	2151.38	1919.49	3.16926	4.71355	5.1544	5.76235	7.50248	5.13533
SP_1062	ABC transporter, ATP-binding protein	2628.95	3071.64	707.453	1693.75	1453.1	3.31991	5.12373	6.20814	8.98966	10.8661	8.18104
SP_1063	ABC-2 transporter, permease protein, putative	3004.73	2993.99	611.087	1243.47	1721.89	2.92357	4.62238	6.2751	10.0515	13.4653	12.1772
SP_1064	transposase, IS200 family	222.458	332.374	94.4918	152.13	277.949	24.4659	20.2514	22.6275	21.471	58.8309	27.7398
SP_1065	hypothetical protein	0	0	0	0	0	1.61509	0.988329	1.42937	0.963336	1.29558	1.3092
SP_1067	cell division protein FtsW, putative	417.923	272.775	304.316	315.114	297.906	113.632	148.792	135.111	170.362	180.978	163.658
SP_1068	phosphoenolpyruvate carboxylase	582.06	514.917	641.742	668.426	746.486	340.731	458.673	397.6	477.575	421.979	475.684
SP_1069	conserved hypothetical protein	22.9229	73.2899	40.1835	148.051	95.4695	21.4242	26.5517	25.2017	212.73	182.726	33.9897
SP_1070	conserved hypothetical protein	77.5332	90.8565	99.6297	46.784	37.9896	15.0947	20.8464	19.1197	130.095	101.241	25.7589
SP_1071	ABC transporter, ATP-binding protein	72.9364	0	84.301	77.1926	65.0929	18.3497	28.1669	24.8672	185.386	149.493	38.5226
SP_1072	DNA primase	440.103	384.361	156.237	253.367	222.105	236.673	296.665	253.979	306.929	273.186	315.419
SP_1073	RNA polymerase sigma-70 factor	505.852	570.358	210.399	406.023	433.967	521.159	504.468	512.287	612.24	450.012	599.739
SP_1074	conserved hypothetical protein	1094.39	1233.31	862.82	450.686	573.902	623.286	647.464	666.296	808.858	661.283	868.087
SP_1075	glycosyl transferase CpoA	596.175	401.623	69.2064	150.672	129.546	185.291	208.905	219.859	203.26	204.304	193.327
SP_1076	glycosyl transferase, group 1	343.929	303.631	106.158	377.271	167.666	336.183	328.048	378.018	283.781	258.207	250.329
SP_1077	conserved domain protein	491.482	428.56	0	407.4	232.606	334.875	493.438	621.876	411.588	403.507	422.4
SP_1078	hypothetical protein	605.333	432.222	0	300.457	365.967	269.162	313.267	405.606	425.764	369.545	453.919
SP_1079	GTP-binding protein, GTP1/Obg family	548.436	440.42	289.278	297.004	296.559	257.038	244.502	274.836	342.1	260.84	309.439
SP_1080	hypothetical protein	638.308	146.793	865.198	255.105	491.983	431.839	310.743	366.814	502.569	387.766	477.896
SP_1081	UDP-N-acetylglucosamine 1-carboxyvinyltransferase	991.687	740.953	177.735	690.336	372.502	279.984	389.788	432.029	404.937	438.036	372.603
SP_1082	acetyltransferase, GNAT family	959.895	1091.42	115.914	587.851	663.812	451.557	534.959	564.807	402.083	431.521	384.764
SP_1083	conserved hypothetical protein	611.59	542.18	285.377	758.196	715.181	479.671	549.96	534.28	449.869	445.349	437.919
SP_1084	methionine aminopeptidase, type I	964.438	586.211	557.356	910.794	1066.34	568.967	646.951	638.887	671.651	595.37	667.458
SP_1086	IS1381, transposase OrfB	128.427	112.212	32.8125	184.897	84.4538	99.4345	143.389	121.753	98.092	121.751	118.195
SP_1087	ATP-dependent DNA helicase PcrA	189.774	288.95	291.727	176.971	194.001	253.567	280.49	274.358	224.344	213.386	249.029
SP_1088	DNA repair protein RadC	294.194	12.8524	197.309	112.506	12.0914	30.9651	39.6692	50.1189	107.309	116.548	90.0692
SP_1089	glutamine amidotransferase, class I	531.046	181.815	143.733	215.545	35.8011	103.213	117.356	133.992	251.911	262.683	219.726
SP_1090	conserved hypothetical protein	117.024	495.339	239.194	315.901	153.911	83.4243	82.1502	80.2297	238.413	216.141	192.892
SP_1091		595.255	596.049	0	0	0	17.9516	20.4959	23.2019	43.5567	48.7797	52.0031
SP_1092	hypothetical protein	732.258	509.405	266.602	536.531	98.0268	252.55	353.166	467.821	586.419	631.939	671.845
SP_1093	hypothetical protein	325.729	83.8363	294.181	621.636	177.462	278.314	367.455	449.136	570.331	539.358	645.092
SP_1094	aminotransferase, class-V	277.487	309.799	165.426	282.979	212.889	224.89	288.253	309.304	389.644	364.405	447.315
SP_1095	ribose-phosphate pyrophosphokinase	289.7	426.989	119.971	258.205	141.526	125.376	172.97	168.669	260.8	243.032	300.803
SP_1096	conserved hypothetical protein	48.5603	87.0132	0	63.2542	0	9.82868	17.0571	17.8813	42.6618	43.7619	64.9815
SP_1097	conserved hypothetical protein	370.706	145.441	247.559	362.158	165.42	59.6083	117.52	101.637	139.036	152.486	171.116
SP_1098	conserved hypothetical protein	294.513	349.103	46.875	368.693	191.027	80.4166	137.415	110.206	166.95	166.779	189.319
SP_1099	ribosomal large subunit pseudouridine synthase, RluD subfamily	192.493	126.848	57.0653	200.975	206.545	106.139	144.82	125.938	192.698	169.154	205.802
SP_1100	phosphate acetyltransferase	471.8	353.093	190.313	300.457	320.925	126.412	160.802	136.34	286.967	256.858	316.29
SP_1102	conserved hypothetical protein TIGR00103	779.062	270.696	1857.97	309.75	396.149	413.187	555.026	455.458	1340.79	1191.35	1599.35
SP_1103	hypothetical protein	878.71	0	681.316	333.841	343.094	111.736	256.866	195.093	655.909	749.549	974.19
SP_1104	ribosomal protein L21	71.0446	24.8298	0	70.3198	110.958	51.3032	72.4556	70.9538	118.77	104.904	118.846
SP_1105	ribosomal protein L21	6439.69	7279.86	3615.63	2203.35	2391.85	943.364	1476.09	1459.35	4869.15	4310.28	4800.86
SP_1106	conserved hypothetical protein	5757.46	5496.74	3801.97	3396.47	2995.36	1747.44	2157.08	2379.48	7226.05	5719.12	6321.58
SP_1107	ribosomal protein L27	7163.8	6694.9	5096.3	2767.37	2600.29	1290.66	1636.14	1551.73	5305.38	3868.71	5157.89
SP_1108	hypothetical protein	0	76.7764	0	0	0	3.2107	2.80677	2.00413	5.14972	5.73401	6.66268
SP_1109	hypothetical protein	0	0	0	0	0	2.80117	4.22819	2.96166	7.02385	6.86361	10.1725
SP_1110	macrolide-efflux protein	390.538	257.427	118.49	98.1887	116.607	58.4279	97.7989	98.639	196.676	167.051	243.253
SP_1111	conserved hypothetical protein	319.813	109.965	188.411	138.019	155.18	156.641	194.68	147.006	299.343	256.066	290.889
SP_1112	degV family protein	558.608	392.473	285.645	413.129	367.6	539.079	602.51	500.46	705.92	711.449	772.721
SP_1113	DNA-binding protein HU	5620.88	8139.41	17108.9	1681.91	1446.96	695.584	1262	874.885	2205.06	2451.05	2193.42
SP_1114	ABC transporter, ATP-binding protein	420.644	351.266	285.945	324.627	281.402	213.131	255.018	248.217	251.237	252.982	273.516
SP_1115	transcriptional regulator MutR, putative	280.699	560.539	236.979	365.139	319.268	215.042	240.09	247.833	236.298	243.555	297.949
SP_1116	transporter, putative	102.852	86.6095	40.7026	80.2749	66.3489	42.1863	39.1852	44.8393	61.5344	61.0874	66.3128
SP_1117	DNA ligase, NAD-dependent	143.985	142.971	130.647	135.735	58.8461	119.053	115.074	115.35	135.067	115.88	177.175
SP_1118	pullulanase, putative	225.458	282.793	42.095	211.506	173.353	252.302	289.298	269.238	296.944	268.776	447.65
SP_1119	glyceraldehyde-3-phosphate dehydrogenase, NADP-dependent	192.391	352.148	1010.28	392.176	340.927	109.318	208.015	180.541	198.606	264.306	207.778
SP_1120	1,4-alpha-glucan branching enzyme	0	0	0	0	0	9.92416	14.2355	17.1655	5.39144	9.71177	7.52902
SP_1121	glucose-1-phosphate adenylyltransferase	276.049	261.653	13.2679	560.729	450.344	402.283	301.424	219.667	286.393	247.631	216.386
SP_1122	glycogen biosynthesis protein GlgD	533.914	749.157	167.938	524.42	493.479	926.823	675.599	480.839	393.382	357.824	306.062
SP_1123	glycogen synthase	567.693	285.352	224.507	442.779	548.95	1027.06	675.212	563.016	362.46	331.311	290.275
SP_1124		418.214	764.98	174.016	154	295.721	561.836	299.22	277.215	232.02	188.381	196.542
SP_1126	conserved hypothetical protein TIGR00045	125.193	2.61425	45.867	80.7681	44.2701	37.0779	33.1276	33.4722	27.4597	32.7424	36.3563
SP_1127	hypothetical protein	271.28	143.591	128.828	100.825	46.0528	55.9232	47.3361	49.891	124.534	152.057	155.399
SP_1128	enolase	5096.52	4831.2	5491.38	5801.93	4360.05	7052.16	7841.08	4615.14	5103.91	5502.51	5684.43
SP_1129	integrase/recombinase, phage integrase family	58.8826	90.232	27.4847	143.259	45.9816	59.9316	85.6595	72.6348	139.288	123.761	146.3
SP_1130	transcriptional regulator	74.5196	168.383	67.828	58.3928	33.9457	27.4904	41.7368	37.3758	89.3049	85.848	100.318
SP_1131	transcriptional regulator, putative	0	0	18.0747	0	0	0.094955	1.00717	0.501976	0.426442	0.923272	0.591137
SP_1132	hypothetical protein	0	0	0	0	30.8399	1.17502	1.33535	1.61631	0.895209	1.32204	0.522503
SP_1133	hypothetical protein	0	0	0	0	26.9093	0.878799	1.97181	2.48879	0.740002	1.02538	0.759849
SP_1134	hypothetical protein	0	0	0	0	0	1.45045	2.39646	2.46462	0.651394	0.78272	0.771284
SP_1135	hypothetical protein	0	0	0	0	0	0.816236	1.54385	1.31691	0.749804	0.779217	0.487612
SP_1136	conserved domain protein	0	0	0	0	0	1.20319	1.74865	2.10127	0.788011	1.08215	0.624198
SP_1137	GTP-binding protein, putative	8.93603	0	0	0	0	0.607712	1.59598	1.86448	0.724951	0.649984	0.683091
SP_1138	hypothetical protein	0	0	0	0	0	0.504716	2.59436	1.48655	1.92667	0.353339	0.942624
SP_1139	hypothetical protein	263.208	201.671	334.174	249.227	170.756	74.6979	126.43	134.532	138.458	174.133	146.777
SP_1140	hypothetical protein	21.5069	183.619	149.148	126.066	201.538	41.8152	73.1363	82.6069	30.7023	36.6303	28.1835
SP_1141	hypothetical protein	59.1439	402.092	82.0313	57.7802	131.959	59.7224	90.1458	109.069	63.8679	64.9067	50.7134
SP_1142	hypothetical protein	115.451	88.7318	202.384	296.071	280.485	127.068	151.711	182.147	103.793	104.238	85.9622
SP_1143	conserved hypothetical protein	108.038	95.6558	0	86.1968	326.22	243.625	267.03	256.319	149.379	140.737	127.597
SP_1144	conserved hypothetical protein	219.677	138.929	174.107	214.612	322.088	427.684	526.367	528.09	278.815	282.949	303.968
SP_1145	hypothetical protein	277.779	109.008	177.287	200.557	269.635	464.67	386.879	427.208	233.444	212.568	283.146
SP_1146	hypothetical protein	655.309	0	560.316	483.787	348.909	586.759	477.788	506.063	347.053	316.128	546.473
SP_1148	IS630-Spn1, transposase Orf2	248.838	163.518	651.169	678.023	995.882	295.487	363.659	382.956	646.48	862.159	805.465
SP_1149	IS630-Spn1, transposase Orf1	360.334	496.745	360.584	518.775	414.674	151.196	251.34	261.679	371.941	621.416	536.009
SP_1150	hypothetical protein	0	0	0	0	0	1.0985	1.20998	0.124439	1.35667	2.69161	2.39352
SP_1151	exonuclease RexB	105.413	131.804	41.0157	85.2947	87.9727	126.597	131.203	108.606	106.988	102.234	136.747
SP_1152	exonuclease RexA	70.7589	114.271	63.0907	102.457	78.9369	184.234	212.607	162.344	151.712	142.989	185.524
SP_1153	hypothetical protein	116.267	169.507	70.5511	122.324	132.698	186.422	189.959	144.293	157.661	125.978	149.694
SP_1154	immunoglobulin A1 protease	140.243	199.836	174.455	248.008	200.552	155.21	245.88	206.599	335.505	279.072	431.513
SP_1155	GTP-binding protein	417.697	191.761	304.151	275.067	125.64	139.809	182.728	181.469	230.191	234.111	330.295
SP_1156	ribonuclease HII	168.983	209.462	192.774	138.673	232.248	183.972	238.133	238.56	265.181	263.566	388.924
SP_1157	voltage-gated chloride channel family protein	275.34	378.09	105.197	171.441	138.034	179.586	202.946	226.138	258.682	237.397	377.322
SP_1158	hypothetical protein	0	281.513	196.443	0	252.806	98.4833	75.903	70.3672	46.2372	27.7526	71.9977
SP_1159	integrase/recombinase, phage integrase family	61.5343	0	0	84.1617	61.507	193.608	155.696	144.788	49.6859	49.7917	90.8997
SP_1160	lipoate-protein ligase, putative	300.892	615.917	352.238	191.2	133.079	70.5782	84.4254	89.8369	342.139	273.461	358.612
SP_1161	acetoin dehydrogenase complex, E3 component, dihydrolipoamide dehydrogenase, putative	340.345	289.353	110.771	137.533	128.056	81.5365	96.1041	98.995	306.72	254.665	329.668
SP_1162	acetoin dehydrogenase complex, E2 component, dihydrolipoamide acetyltransferase, putative	267.653	217.974	153.219	168.36	193.237	95.6477	112.358	108.716	320.237	271.426	312.335
SP_1163	acetoin dehydrogenase, E1 component, beta subunit, putative	238.924	675.756	325.399	99.8499	70.4845	93.2257	95.4943	93.6303	299.729	258.166	259.863
SP_1164	acetoin dehydrogenase, E1 component, alpha subunit, putative	258.444	358.29	115.555	18.6042	101.972	79.3926	90.4864	89.4654	249.627	269.512	197.757
SP_1165	hypothetical protein	201.866	210.27	28.8218	0	0	12.9207	14.8249	15.3229	15.3	18.1381	22.9372
SP_1166	MATE efflux family protein	278.71	163.868	178.518	195.231	123.937	241.37	261.193	258.656	207.709	219.726	228.664
SP_1167	dihydroorotase, multifunctional complex type	76.8612	137.943	65.5475	166.921	149.242	222.637	271.171	223.26	219.898	220.025	251.542
SP_1168	mutator MutT protein	45.3528	276.065	27.5202	145.383	230.205	163.613	222.594	194.105	192.759	196.215	225.588
SP_1169	uracil-DNA glycosylase	60.4617	321.193	215.238	137.824	151.087	116.913	198.797	161.474	175.986	190.066	214.027
SP_1170	hypothetical protein	52.4603	38.7065	21.222	29.8962	68.2773	15.1811	23.6283	21.0284	80.6124	48.8035	93.9117
SP_1171	hydrolase, haloacid dehalogenase-like family	51.6888	106.24	53.7684	12.6243	11.5326	25.1242	62.2274	53.2245	136.037	118.083	166.065
SP_1172	hypothetical protein	0	0	0	0	0	0.280117	0.114276	0.951961	0	0.217892	0.290642
SP_1173	conserved hypothetical protein	56.2374	0	0	84.128	0	1.79275	1.13361	1.28621	1.0735	2.57984	1.92211
SP_1174	conserved domain protein	49.2935	50.997	964.969	2026.25	2043.5	30.1616	30.2245	37.1807	68.5765	53.6387	67.8922
SP_1175	conserved domain protein	187.123	146.541	1897.75	2170.18	2337.99	38.4839	61.2847	49.6385	174.444	133.449	141.376
SP_1176	phosphoenolpyruvate-protein phosphotransferase	3996	4230.71	3103.28	3363.25	2329.24	1502.29	1655.14	1251.43	2438.86	2242.42	1984.43
SP_1177	phosphocarrier protein HPr	7429.09	11410.3	6519.63	6248.15	4725.34	1384.25	2395.53	1673.62	5151.95	5029.65	4884.02
SP_1178	NrdH-redoxin	1306.03	1192.31	2687.93	1008.38	845.984	279.299	621.909	599.982	515.494	994.365	827.388
SP_1179	ribonucleoside-diphosphate reductase 2, alpha subunit	743.852	930.629	1048.63	742.797	670.939	516.785	743.731	706.044	747.068	946.705	1095.6
SP_1180	ribonucleoside-diphosphate reductase 2, beta subunit	613.181	719.529	681.039	748.803	752.455	507.038	641.467	617.388	915.247	982.402	1132.07
SP_1181	hypothetical protein	279.59	0	161.577	273.143	166.348	357.305	339.918	282.063	294.805	283.392	278.664
SP_1182	lactose phosphotransferase system repressor	287.137	72.7461	92.366	272.068	216.122	977.293	713.349	597.262	444.94	372.887	384.289
SP_1183	hypothetical protein	367.461	0	0	0	0	115.646	45.2116	51.079	14.7911	7.52719	8.8778
SP_1184	6-phospho-beta-galactosidase	78.6904	37.3241	0	0	17.557	120.002	66.6453	63.1123	14.3682	10.667	8.79983
SP_1185	PTS system, lactose-specific IIBC components	117.629	51.7288	0	10.6545	19.4663	272.859	129.269	117.769	31.7921	20.9547	14.484
SP_1186	PTS system, lactose-specific IIA component	198.953	36.6981	0	0	12.9469	91.2231	50.9281	49.6936	28.0084	20.6381	11.2601
SP_1187	transcription antiterminator LacT	62.99	3.48567	22.9335	32.3072	49.1891	91.7928	41.8437	46.0096	42.685	22.086	13.0008
SP_1188	hypothetical protein	17.9329	0	0	30.6589	140.038	145.585	59.983	67.177	38.2536	20.8109	43.1811
SP_1189	hypothetical protein	325.268	85.9669	0	290.497	151.644	868.002	695.831	724.402	268.652	211.512	323.828
SP_1190	tagatose 1,6-diphosphate aldolase	126.298	113.012	78.2684	252.678	188.859	939.778	680.383	663.222	349.984	261.484	412.837
SP_1191	tagatose-6-phosphate kinase	257.944	169.403	185.761	237.458	150.519	748.606	607.857	541.328	347.926	272.042	395.099
SP_1192	galactose-6-phosphate isomerase, LacB subunit	132.828	294.012	49.6003	227.09	175.536	500.845	493.405	425.357	409.485	306.645	400.636
SP_1193	galactose-6-phosphate isomerase, LacA subunit	321.781	212.306	15.0198	179.851	96.6461	424.621	515.27	450.118	467.469	387.02	422.455
SP_1195	IS1381, transposase OrfB	0	0	16.4063	0	0	95.5846	104.993	84.2608	60.4487	61.5462	99.504
SP_1197	conserved hypothetical protein	300.153	144.431	126.702	356.979	448.4	503.841	372.289	263.24	594.749	557.114	490.658
SP_1198	hypothetical protein	207.607	213.736	0	346.681	497.674	577.308	380.349	301.652	669.323	666.367	473.034
SP_1199	hypothetical protein	0	0	0	0	0	37.1574	47.1167	30.0505	90.4257	73.6364	110.096
SP_1200	GTP-binding protein LepA	346.137	399.877	228.015	363.217	295.693	547.715	529.269	559.716	381.753	352.283	445.078
SP_1201	serine/threonine protein phosphatase	343.529	200.103	166.763	445.122	310.62	394.147	420.101	429.414	240.833	231.109	289.781
SP_1202	DNA repair protein RecN	258.398	334.078	105.49	318.831	296.196	305.758	328.193	318.028	204.524	186.713	221.069
SP_1203	transcriptional repressor, putative	183.065	324.167	59.2449	271.246	295.442	255.815	292.514	290.965	173.179	156.55	188.137
SP_1204	hemolysin A, putative	282.6	171.043	117.894	286.869	199.994	225.351	253.175	259.703	141.457	124.888	138.69
SP_1205	geranyltranstransferase	273.845	238.129	76.6937	365.282	187.997	259	267.812	258.189	157.71	132.467	139.787
SP_1206	exodeoxyribonuclease VII, small subunit	482.672	123.275	60.0793	275.067	231.951	289.218	310.701	317.499	191.417	180.145	193.216
SP_1207	exodeoxyribonuclease VII, large subunit	86.4949	134.888	40.5569	164.68	144.299	133.036	146.835	144.373	92.5819	88.8532	91.0116
SP_1208	uridine kinase	160.891	187.195	140.185	70.5299	12.8861	56.6898	85.5833	98.1061	108.594	141.436	102.03
SP_1209	hypothetical protein	901.241	137.148	82.0313	38.5202	35.1891	79.7736	104.782	89.9346	212.033	170.515	265.801
SP_1210	hypothetical protein	1153.31	850.938	304.688	509.704	294.08	272.848	479.876	400.05	836.872	826.823	1169.35
SP_1211	hypothetical protein	1070.93	1732.27	99.9757	234.732	814.847	188.962	316.4	365.447	705.53	763.848	991.211
SP_1212	tRNA pseudouridine synthase B	98.9673	182.551	7.27923	179.454	149.884	77.6808	120.407	121.152	163.555	151.692	175.033
SP_1213	conserved domain protein	72.3643	105.259	0	127.253	29.0621	29.3343	63.1661	68.2625	93.2403	91.1046	107.057
SP_1215	transporter, FNT family, putative	260.97	372.914	136.308	491.349	247.647	109.997	83.0001	90.0904	175.159	213.223	180.475
SP_1216	hypothetical protein	219.677	702.362	0	292.111	266.851	25.9368	29.7116	36.9032	79.2076	150.83	131.973
SP_1217	hypothetical protein	723.105	476.12	88.8673	125.191	28.5911	13.0721	13.4274	9.07889	38.2643	26.1471	39.2367
SP_1218	conserved hypothetical protein	1551.92	1364.64	1075.01	969.217	586.579	209.004	297.338	283.2	526.907	444.535	589.629
SP_1219	DNA gyrase subunit A	568.546	742.669	261.743	523.884	358.518	207.707	270.662	272.117	405.817	371.492	439.05
SP_1220	L-lactate dehydrogenase	2502.59	2539.14	3429.36	2858.45	1893.79	2970.62	2927.75	2080.49	2984.83	2696.41	3215.68
SP_1221	type II restriction endonuclease, putative	228.384	125.036	110.081	170.305	245.383	130.752	173.497	133.331	145.979	158.336	154.966
SP_1222	type II restriction endonuclease, putative	205.641	26.4098	97.101	103.192	85.4994	35.9708	56.3565	53.1774	55.237	66.1543	64.3437
SP_1223	conserved hypothetical protein	217.093	549.177	50.1839	176.74	226.038	28.8246	54.422	56.8439	59.8415	84.4396	65.6054
SP_1224	conserved domain protein	156.602	327.376	0	29.7482	54.3515	14.5328	24.5749	25.8883	33.4637	53.5023	46.2342
SP_1225	vicX protein	618.351	488.051	296.224	450.686	315.138	389.01	493.01	518.259	550.074	435.058	721.224
SP_1226	sensory box sensor histidine kinase	619.002	660.22	265.417	464.04	500.154	454.554	572.495	640.555	665.773	574.713	873.778
SP_1227	DNA-binding response regulator	555.27	608.33	589.927	319.635	426.312	363.207	429.929	448.876	636.532	512.983	810.055
SP_1228	A/G-specific adenine glycosylase	225.428	188.39	156.332	133.711	140.112	113.963	176.367	169.083	279.253	256.885	394.026
SP_1229	formate-tetrahydrofolate ligase	334.446	99.5198	302.5	323.652	243.923	100.963	119.995	112.488	113.484	104.111	109.522
SP_1230	conserved hypothetical protein	114.614	50.7392	64.9117	65.3168	59.6685	82.2489	125.942	117.951	223.104	254.877	291.822
SP_1231	flavoprotein	66.8584	126.848	104.322	179.621	89.5027	178.95	312.395	291.797	377.401	474.934	580.505
SP_1232	membrane protein	102.828	263.817	317.653	239.727	291.995	327.38	421.02	365.256	549.061	606.065	816.334
SP_1233	hypothetical protein	81.5298	77.6998	76.9572	116.156	191.001	77.451	66.7511	60.9779	65.2562	93.7386	79.2225
SP_1234	transcriptional regulator, biotin repressor family	296.309	163.968	657.205	541.522	781.934	286.936	257.731	239.934	212.69	264.891	289.944
SP_1235	MutT/nudix family protein	321.067	168.317	355.469	279.271	272.715	185.237	193.301	174.635	281.868	261.163	344.523
SP_1236	acetyltransferase, GNAT family	261.457	143.19	45.7966	165.897	58.9363	75.4999	100.338	93.5738	190.99	152.899	232.752
SP_1237	acetyltransferase, GNAT family	271.091	150.013	79.4133	87.8997	197.096	80.201	112.792	100.71	183.682	152.525	234.204
SP_1238	excinuclease ABC, subunit B	155.066	85.0755	102.941	111.029	80.7279	79.5201	108.077	93.087	141.581	133.299	188.39
SP_1240	conserved hypothetical protein	22.1059	107.036	13.4139	113.38	112.207	131.861	104.285	109.352	50.5971	75.6456	57.312
SP_1241	amino acid ABC transporter, amino acid-binding protein/permease protein	951.733	1071.5	500.709	289.221	351.647	903.669	648.37	892.371	1136.82	827.508	625.361
SP_1242	amino acid ABC transporter, ATP-binding protein	1323.4	964.626	177.015	383.174	300.033	1290.66	949.958	1326	1891.9	1281.91	1159.29
SP_1243	glucose-6-phosphate 1-dehydrogenase	815.818	722.513	513.854	351.341	459.303	882.987	700.758	859.307	1427.45	1082.56	1372.47
SP_1244	signal recognition particle-docking protein FtsY	269.744	287.227	54.5604	352.863	341.498	231.668	258.56	261.029	284.182	244.232	250.745
SP_1245	Cof family protein	308.997	121.117	207.031	456.739	346.864	192.19	240.891	217.111	200.605	182.87	176.713
SP_1246	Cof family protein	369.721	638.548	104.629	374.154	145.006	195.469	286.801	260.37	170.471	168.657	152.275
SP_1247	conserved hypothetical protein	180.955	220.049	150.02	365.387	279.127	142.98	186.13	160.435	117.95	125.72	117.091
SP_1248	ribonuclease III	60.3406	463.294	0	167.637	88.3503	23.4994	38.6281	34.0109	37.3442	54.5011	45.2055
SP_1249	conserved hypothetical protein	520.816	842.44	975.649	438.357	358.736	77.729	114.109	115.071	215.683	334.018	337.687
SP_1250	conserved domain protein	49.5886	35.1242	129.991	37.3028	49.5666	16.2211	17.1181	19.2255	35.8375	32.1575	50.7279
SP_1251	endonuclease, putative	72.3162	9.06056	19.8709	62.9841	61.7995	12.9098	18.1421	16.9435	29.093	30.7215	43.8731
SP_1252	hypothetical protein	346.859	204.737	0	184.491	0	115.323	154.212	120.767	75.4802	120.032	96.8808
SP_1253	hypothetical protein	566.91	0	275.202	387.687	0	202.648	228.551	183.568	112.544	162.927	125.882
SP_1254	hypothetical protein	237.984	283.646	0	532.06	314.503	153.209	179.889	146.232	85.09	131.28	106.892
SP_1255	3-isopropylmalate dehydratase, small subunit, putative	80.5484	89.1459	106.641	237.862	137.237	105.262	111.647	91.212	60.3492	75.6812	62.811
SP_1256	conserved hypothetical protein	19.5269	108.056	165.886	150.229	45.7458	98.1448	88.1699	82.0332	54.9328	69.9676	50.8516
SP_1258	2-isopropylmalate synthase, putative	103.519	66.6096	35.06	119.36	124.078	51.8793	61.3519	47.1083	33.3744	43.7814	33.7835
SP_1259	conserved hypothetical protein	70.6106	17.3661	0	228.026	61.2667	45.1189	60.3212	48.1269	34.4079	48.6367	34.7733
SP_1260	copper homeostasis protein CutC	208.225	165.924	106.135	220.715	214.637	81.7252	127.599	112.651	193.768	183.959	190.437
SP_1261	conserved hypothetical protein	432.032	153.979	26.6602	75.1143	205.856	32.1201	43.9961	43.5787	79.6386	80.5475	78.2474
SP_1262	IS1167, transposase	38.7975	32.4941	35.6317	14.3416	29.4782	33.0971	23.5969	31.8684	25.6204	33.3859	24.3982
SP_1263	DNA topoisomerase I	203.359	290.361	353.438	373.425	415.633	242.293	288.281	304.331	335.779	499.515	409.136
SP_1264	conserved domain protein	142.664	117.371	49.0302	151.092	39.4361	83.9815	89.8705	129.858	168.276	288.069	173.895
SP_1265	hypothetical protein	0	0	0	0	0	3.26803	4.11392	1.79815	1.15317	3.37733	3.58459
SP_1266	DNA processing protein DprA, putative	719.501	6.77701	81.7455	31.4067	9.56359	100.582	47.3666	50.6681	18.4683	21.5766	31.1369
SP_1267	licC protein	1023.89	761.087	918.038	751.143	566.85	1504.47	934.615	1360.98	1464.57	1136.92	3690.64
SP_1268	licB protein	1249.09	1241.35	469.51	712.689	543.329	1657.34	1160.93	1515.92	1533.32	1271.14	3955.27
SP_1269	choline kinase	818.57	1109.32	421.697	742.575	480.07	1388.32	975.991	1281.27	1286.51	1091.88	3710
SP_1270	alcohol dehydrogenase, zinc-containing	718.944	1078.02	309.602	744.535	478.923	1778.72	1243.47	1494.34	1316.02	1249.96	3849.48
SP_1271	cytidine diphosphocholine pyrophosphorylase, putative	955.039	1499.96	533.204	630.196	447.766	1512.32	953.019	1060.33	1067.69	1036.54	3128.67
SP_1272	polysaccharide biosynthesis protein, putative	184.246	215.676	77.4005	66.6337	102.375	60.421	66.6484	67.1406	143.588	159.957	178.964
SP_1273	licD1 protein	280.335	302.999	71.6244	145.744	81.9328	131.251	135.766	134.443	246.86	259.893	322.078
SP_1274	licD2 protein	331.957	140.472	268.577	172.485	50.8287	139.547	143.919	122.133	297.075	276.723	373.529
SP_1275	carbamoyl-phosphate synthase, large subunit	247.267	140.503	291.021	304.997	215.122	385.238	332.821	300.181	488.871	230.246	744.769
SP_1276	carbamoyl-phosphate synthase, small subunit	183.065	198.552	201.432	354.707	392.652	315.153	370.875	330.636	762.292	266.119	867.836
SP_1277	aspartate carbamoyltransferase	181.163	382.054	256.215	360.939	302.992	206.583	237.782	224.734	697.811	213.591	679.034
SP_1278	pyrimidine operon regulatory protein	409.055	0	73.5453	155.409	47.3233	102.903	125.073	122.065	573.067	140.703	462.377
SP_1279	endonuclease III	443.539	500.143	213.281	293.304	274.475	163.784	247.379	208.122	427.422	319.866	446.537
SP_1280	conserved hypothetical protein	485.475	561.471	141.402	107.899	90.9862	75.9773	154.43	133.029	398.808	341.453	480.122
SP_1281	hypothetical protein	0	0	0	0	0	12.7354	9.21698	8.6006	19.1794	18.3601	32.5901
SP_1282	ABC transporter, ATP-binding protein	13.5186	48.625	53.3204	0	36.9485	23.4939	31.6631	37.6391	53.062	75.4578	53.8806
SP_1283	heat shock protein HtpX	284.116	343.617	149.297	380.579	178.409	259.936	326.569	290.031	945.53	683.15	1085.05
SP_1284	lemA protein	451.102	429.044	456.217	425.782	146.778	229.986	322.905	283.971	1080.34	837.196	1212.16
SP_1285	glucose-inhibited division protein B	171.681	249.254	26.8842	113.618	172.988	163.975	191.484	204.187	269.29	332.478	292.906
SP_1286	uracil permease	217.68	181.239	24.2365	95.6	65.4997	80.7417	99.5028	104.37	313.31	178.949	247.257
SP_1287	signal recognition particle protein	298.493	322.002	191.302	286.696	178.094	190.558	201.43	230.304	321.967	321.025	392.227
SP_1288	conserved hypothetical protein	174.159	420.541	259.396	175.943	247.275	57.5376	86.5611	89.8789	168.338	185.11	168.241
SP_1289	hypothetical protein	174.347	0	50.7813	23.8458	43.5674	26.4703	40.2322	42.2087	103.403	117.281	90.2068
SP_1290	conserved hypothetical protein	62.6207	33.5345	0	124.327	123.04	123.372	143.131	119.429	183.967	202.484	236.407
SP_1291	Cof family protein	109.43	75.9201	190.288	206.634	265.292	210.931	213.886	179.131	223.105	230.885	303.637
SP_1292	SAP domain protein	197.908	148.942	108.882	288.728	243.153	151.706	142.649	139.557	121.859	135.721	199.441
SP_1293	ribosomal protein L19	4662.47	6522.46	2886.65	1502.29	1620.82	2366.28	2143.73	2631.02	5816.17	6364.59	7871.76
SP_1294	crcB protein	655.038	331.534	9.69461	423.372	374.284	221.004	192.024	200.277	118.329	87.3154	65.0686
SP_1295	crcB protein	263.613	427.9	8.53126	468.713	98.811	161.915	239.339	229.283	117.447	98.2433	67.15
SP_1296	chorismate mutase, putative	345.56	480.787	0	388.231	61.6798	73.0193	143.705	137.482	88.1074	88.8217	66.0095
SP_1297	flavodoxin	1223.07	1038.21	1642.84	497.379	574.914	211.854	254.711	227.985	555.873	586.925	582.227
SP_1298	DHH subfamily 1 protein	171.799	15.5849	61.5235	91.4854	43.9864	96.1497	113.426	98.4371	232.664	194.427	248.946
SP_1299	ribosomal protein L31	12562.3	16172.3	17852.4	3004.57	3422.47	590.39	1724.46	1382.58	4737.55	8870.04	5239.65
SP_1300	hypothetical protein	180.557	106.575	0	61.7378	37.5993	33.0513	40.1373	33.0941	54.8582	61.3083	52.3422
SP_1302	conserved hypothetical protein	156.912	0	0	17.8844	0	33.2139	36.8403	27.7026	37.84	46.6912	43.3195
SP_1303	hypothetical protein	137.298	0	0	93.8929	0	10.271	8.71351	9.12296	19.0011	22.8787	18.044
SP_1304	hypothetical protein	0	0	0	0	0	0.768949	1.74774	0.746636	0.740002	1.66623	1.13977
SP_1305	hypothetical protein	1657	555.715	0	85.8449	431.318	26.7845	113.492	80.8714	133.348	414.493	215.131
SP_1306	NADP-specific glutamate dehydrogenase	1430.59	1076.47	688.771	515.261	379.008	545.104	564.913	450.157	993.608	937.315	669.785
SP_1307	hypothetical protein	215.823	204.737	0	263.559	337.074	168.529	187.492	192.248	214.376	189.528	211.846
SP_1310	IS1381, transposase OrfA	145.351	0	144.326	225.908	185.735	63.072	97.7786	93.367	221.301	233.915	232.572
SP_1314	IS66 family element, Orf1	0	0	0	0	0	5.46229	6.68512	6.92816	9.43503	13.6727	12.5461
SP_1315	v-type sodium ATP synthase, subunit D	0	0	0	0	13.4547	6.1699	4.14529	4.60426	5.59113	5.87455	6.38273
SP_1316	v-type sodium ATP synthase, subunit B	0	0	0	0	8.91152	7.07367	6.89611	5.65957	5.95419	7.23478	7.54076
SP_1317	v-type sodium ATP synthase, subunit A	0	6.57095	0	0	0	7.83571	7.68271	6.46076	5.04335	8.21513	6.55254
SP_1318	v-type sodium ATP synthase, subunit G	0	0	199.328	0	0	5.96885	5.68174	5.14039	3.91901	8.34914	5.54122
SP_1319	v-type sodium ATP synthase, subunit C	10.4608	14.4717	107.91	0	0	3.80159	3.82279	3.76503	3.40709	6.3941	4.7979
SP_1320	v-type sodium ATP synthase, subunit E	0	0	0	0	0	2.57977	1.55509	2.13728	1.64275	2.89774	2.5968
SP_1321	v-type sodium ATP synthase, subunit K	0	0	0	0	0	5.91946	6.38218	4.97601	5.16916	8.35939	6.06876
SP_1322	v-type sodium ATP synthase, subunit I	2.64672	26.363	0	0	4.13366	3.33553	3.31124	3.60649	2.69662	6.1233	3.45503
SP_1323	hypothetical protein	0	0	0	27.8201	0	2.10953	1.86227	1.84124	1.2813	2.21927	1.43527
SP_1324	ROK family protein	17.7517	0	0	10.1164	0	3.70975	2.67797	2.63543	1.69428	4.69532	2.08767
SP_1325	oxidoreductase, Gfo/Idh/MocA family	18.4992	0	5.61267	7.90677	0	6.26087	4.73943	5.01032	2.90224	3.36013	3.99761
SP_1326	neuraminidase, putative	10.6726	0	0	0	0	3.42744	3.34345	2.98621	1.82787	2.86406	2.29585
SP_1327	conserved hypothetical protein	34.4592	0	0	0	0	2.4167	2.41995	2.15695	1.23334	1.87985	2.40619
SP_1328	sodium:solute symporter family protein	3.4191	0	0	0	0	2.73941	2.22326	2.01669	1.47665	2.22979	2.20149
SP_1329	N-acetylneuraminate lyase	0	0	0	0	0	1.67216	2.34526	1.2997	1.56223	2.17892	2.0136
SP_1330	N-acetylmannosamine-6-P epimerase, putative	0	0	0	12.8401	0	1.26093	1.23066	1.41031	1.52322	1.97407	2.28539
SP_1331	phosphosugar-binding transcriptional regulator, putative	0	0	0	5.56402	0	1.60462	1.72683	1.28495	1.33566	1.87226	2.32514
SP_1332	conserved domain protein	0	0	0	0	0	1.21956	1.53922	1.5974	1.11252	1.60084	1.56196
SP_1333	hypothetical protein	0	0	0	0	0	3.35183	3.16455	2.54941	2.79556	2.45827	2.38476
SP_1334	conserved hypothetical protein	0	0	0	0	0	1.82334	3.23931	2.96499	2.01413	1.57843	2.4716
SP_1335	hypothetical protein	0	0	0	0	0	1.89709	3.41013	3.4922	1.46434	3.59695	2.21442
SP_1336	type II DNA modification methyltransferase Spn5252IP	0	0	0	0	0	2.16954	3.49549	2.66508	2.53862	2.68093	2.60248
SP_1337	IS1380-Spn1, transposase	1.95704	0	9.50029	13.3834	18.3391	13.7251	11.7075	10.4313	13.6634	17.5187	18.3318
SP_1338	hypothetical protein	0	0	0	50.0762	0	27.4515	55.0808	61.0666	13.1392	13.5819	13.6925
SP_1339	hypothetical protein	191.024	0	1298.23	130.634	328.177	1334.25	1191.65	1138.67	198.272	221.682	327.12
SP_1340	hypothetical protein	41.9384	11.0511	48.4731	180.957	87.3329	393.785	341.144	361.918	56.9056	67.1405	99.4349
SP_1341	ABC transporter, ATP-binding protein	32.0178	129.929	17.2698	225.039	155.573	514.992	590.476	549.56	69.742	91.9558	132.087
SP_1342	toxin secretion ABC transporter, ATP-binding/permease protein	22.9514	72.5747	35.8122	165.364	207.392	225.292	227.28	246.768	36.1989	43.7085	60.5866
SP_1343	prolyl oligopeptidase family protein	21.051	52.6082	108.783	241.48	154.843	312.225	388.904	398.617	43.1195	56.396	64.2857
SP_1344	conserved hypothetical protein	38.3804	30.1811	34.3212	170.95	176.674	379.169	546.489	481.145	72.2364	87.5626	111.362
SP_1345	hypothetical protein	10568.3	12905.3	11932.2	3369.99	5563.68	13749.4	19915	15717	5679.72	6732.4	10524.9
SP_1346	conserved hypothetical protein	0	0	0	0	0	5.33557	4.78092	5.31026	4.23614	3.802	4.1718
SP_1347	hypothetical protein	0	0	0	0	0	9.57067	10.6657	9.43147	5.24168	8.35254	8.47707
SP_1348	conserved hypothetical protein	0	0	0	0	10.8061	6.41108	5.00293	5.49689	3.23581	4.32353	5.61451
SP_1349	hypothetical protein	0	0	0	0	14.7567	8.23284	7.61837	8.14342	4.19335	5.81046	7.58378
SP_1350	conserved domain protein	0	0	0	0	0	7.16221	10.6478	8.26278	6.61069	7.79285	10.6227
SP_1351	hypothetical protein	0	0	0	0	0	9.026	12.1894	12.3402	7.80428	10.6525	13.1327
SP_1352	IS1380-Spn1, transposase	11.7422	2.16593	14.2504	6.6917	6.11303	10.2315	10.5571	9.11207	10.7215	14.6167	14.4393
SP_1353	hypothetical protein	8884.73	11116.2	4709.97	876.334	838.673	474.228	680.32	594.447	1221.54	1468.23	1496.7
SP_1354	ribosomal protein L7/L12	7497.61	9705.24	7178.74	2552.67	2198.03	1366.15	1667.27	1546.77	4555.58	4073.95	3463.57
SP_1355	ribosomal protein L10	7476.93	9369.78	2988.49	1835.13	1660	611.763	680.288	690.15	3664.13	3466.37	2126.62
SP_1356	Atz/Trz family protein	146.452	116.932	208.203	107.306	130.702	85.7604	134.29	152.525	254.746	280.106	337.846
SP_1357	ABC transporter, ATP-binding/permease protein	83.8969	171.043	96.459	83.041	89.6526	64.782	85.1803	87.0142	181.36	190.22	207.341
SP_1358	ABC transporter, ATP-binding/permease protein	97.8042	199.574	74.1849	39.1901	93.0828	90.339	107.924	100.248	135.595	159.884	172.384
SP_1359	peptide methionine sulfoxide reductase	830.984	776.758	429.289	316.776	394.613	317.705	461.104	435.205	899.278	717.22	1062.62
SP_1360	homoserine kinase	748.418	385.647	547.913	523.21	444.839	239.549	320.76	298.952	653.367	482.338	649.034
SP_1361	homoserine dehydrogenase	648.279	496.451	154.119	388.703	230.329	195.573	256.659	244.25	474.464	414.879	511.982
SP_1362	putative transcriptional regulator MecA	482.219	312.307	658.918	366.411	334.726	327.836	370.104	398.671	712.698	624.412	763.546
SP_1363	conserved domain protein	537.414	367.859	327.65	570.433	664.309	423.223	384.562	386.647	441.736	405.52	539.949
SP_1364	hypothetical protein	396.155	372.317	93.7011	433.715	310.076	286.743	273.286	287.536	233.266	222.505	261.529
SP_1365	glycosyl transferase, family 2	360.565	415.308	116.689	210.046	266.966	168.331	213.06	227.403	111.984	122.616	113.465
SP_1366	glycosyl transferase, group 1	355.782	399.042	57.9569	195.95	302.072	127.869	176.208	202.959	87.6728	88.5306	70.0279
SP_1367	licD3 protein	325.621	300.027	332.78	143.836	204.396	105.822	145.17	153.304	101.28	133.78	102.515
SP_1368	psr protein	332.876	219.671	210.772	491.336	439.16	255.968	278.886	264.787	219.998	192.709	214.487
SP_1369	prephenate dehydratase	611.681	341.922	331.604	387.516	538.281	284.288	287.958	278.151	223.803	212.811	221.244
SP_1370	shikimate kinase	453.171	611.636	335.348	510.211	578.296	276.476	282.253	287.757	247.988	219.729	239.143
SP_1371	3-phosphoshikimate 1-carboxyvinyltransferase	412.665	399.907	194.345	200.071	304.616	157.573	166.778	152.195	152.342	151.496	155.688
SP_1372	conserved hypothetical protein	676.529	1136.02	792.728	425.426	595.101	421.448	428.503	393.964	479.155	419.202	547.882
SP_1373	prephenate dehydrogenase	250.719	315.798	388.311	693.991	406.491	464.964	456.444	436.672	406.641	376.125	405.541
SP_1374	chorismate synthase	415.637	357.5	241.244	660.388	465.69	426.508	412.79	399.633	337.386	287.987	324.374
SP_1375	3-dehydroquinate synthase	239.424	226.735	233.651	573.907	447.178	264.559	294.471	299.482	204.461	184.584	197.147
SP_1376	shikimate 5-dehydrogenase	434.73	643.215	202.056	368.983	192.614	220.359	266.659	249.804	181.226	176.867	190.063
SP_1377	3-dehydroquinate dehydratase	120.531	432.462	80.2165	385.543	297.55	156.733	214.494	206.417	317.896	307.112	339.511
SP_1378	conserved hypothetical protein	339.348	574.546	638.208	242.056	224.634	75.3761	98.879	104.323	235.171	239.949	212.969
SP_1379	hypothetical protein	179.329	0	0	0	0	12.6529	14.1795	14.8515	21.8225	54.4286	32.979
SP_1380	hypothetical protein	34.8946	103.57	53.8978	75.9278	44.5898	109.903	151.058	140.072	143.225	163.726	125.134
SP_1381	ABC transporter, ATP-binding protein	42.1781	0	85.3126	96.1463	60.3845	79.8372	141.025	114.066	161.041	195.022	125.015
SP_1382	alpha-amylase	219.225	469.206	17.5902	49.56	39.6149	36.6328	48.368	44.5862	111.024	116.88	246.944
SP_1383	alanyl-tRNA synthetase	198.288	394.347	232.093	557.55	402.437	357.908	347.958	261.78	386.921	325.141	563.156
SP_1384	conserved hypothetical protein	291.139	181.612	128.483	334.847	173.614	88.2426	117.91	101.823	176.575	234.09	275.865
SP_1385	hypothetical protein	280.089	158.031	0	262.9	274.475	153.644	126.674	154.641	246.045	248.724	249.71
SP_1386	spermidine/putrescine ABC transporter, spermidine/putrescine-binding protein	265.828	337.787	101.563	336.647	319.067	251.201	242.495	297.209	313.479	386.615	361.873
SP_1387	spermidine/putrescine ABC transporter, permease protein	136.234	233.702	264.535	425.066	404.265	200.686	171.431	195.41	231.837	256.387	239.934
SP_1388	spermidine/putrescine ABC transporter, permease protein	159.187	221.984	0	560.636	183.978	211.712	194.417	202.901	217.355	261.408	239.352
SP_1389	spermidine/putrescine ABC transporter, ATP-binding protein	202.604	114.634	38.678	288.003	266.653	194.669	203.091	213.366	223.594	272.614	234.371
SP_1390	UDP-N-acetylenolpyruvoylglucosamine reductase	213.441	138.052	87.4656	227.476	168.841	91.8761	99.4522	103.184	124.292	150.064	117.932
SP_1391	conserved hypothetical protein	87.5209	294.462	131.708	53.8668	65.6115	150.408	184.152	223.515	234.393	309.476	310.327
SP_1392	alpha-acetolactate decarboxylase	180.064	267.039	144.227	209.335	191.233	144.329	172.856	179.173	245.208	324.32	296.376
SP_1393	conserved hypothetical protein	33.1589	2.29363	65.3929	63.7763	35.6041	36.5121	44.1362	45.752	76.5286	116.994	103.882
SP_1394	amino acid ABC transporter, amino acid-binding protein	264.905	107.261	211.713	121.508	80.7279	40.9328	37.3916	37.814	128.591	80.9566	131.615
SP_1395	phosphate transport system regulatory protein PhoU, putative	1082.26	923.429	689.741	613.319	553.986	615.727	791.29	685.859	1058.05	1005	1267.41
SP_1396	phosphate ABC transporter, ATP-binding protein, putative	1137.46	872.56	893.59	1104.45	753.992	635.464	778.483	643.788	1040.38	916.422	1256.22
SP_1397	phosphate ABC transporter, ATP-binding protein, putative	1024.62	544.31	493.412	683.877	517.201	661.049	739.619	642.519	1070.79	968.498	1275.96
SP_1398	phosphate ABC transporter, permease protein, putative	974.028	815.912	245.816	397.215	576.863	526.177	597.146	487.189	835.485	763.997	938.436
SP_1399	phosphate ABC transporter, permease protein, putative	1053.88	1034.47	303.194	544.947	475.398	454.059	532.375	456.651	875.93	741.304	904.765
SP_1400	phosphate ABC transporter, phosphate-binding protein, putative	787.24	843.055	323.926	487.089	533.961	297.594	414.777	386.95	743.983	655.357	802.305
SP_1401	hypothetical protein	466.815	1998.18	0	680.724	536.084	120.859	212.41	219.546	672.377	673.287	642.017
SP_1402	NOL1/NOP2/sun family protein	61.6107	19.0029	0	62.1636	50.4781	49.4037	47.5176	46.161	34.8771	46.1731	33.621
SP_1403	inositol monophosphatase family protein	258.845	116.851	8.26672	46.5825	69.1507	104.765	117.854	123.96	81.0226	108.912	76.5433
SP_1404	conserved hypothetical protein	316.525	261.425	91.734	96.9217	295.134	81.1637	114.128	122.242	107.268	217.189	140.508
SP_1405	conserved hypothetical protein	921.334	754.777	1543.9	751.143	1167.54	394.701	331.433	322.656	488.775	674.653	486.544
SP_1406	hypothetical protein	371.106	217.16	144.949	262.536	499.651	335.071	318.219	315.472	351.447	340.673	412.731
SP_1407	hydrolase, haloacid dehalogenase-like family	253.736	478.712	293.469	448.357	664.91	416.861	463.959	464.682	397.636	424.366	445.576
SP_1408	acyl-ACP thioesterase, putative	312.549	126.504	281.774	305.343	284.517	265.041	277.476	282.252	233.089	279.274	271.424
SP_1409	oxygen-independent coproporphyrinogen III oxidase, putative	201.614	188.309	124.461	171.348	302.141	204.122	234.759	242.622	225.54	275.631	228.649
SP_1410	conserved hypothetical protein	848.293	882.731	697.266	843.592	855.095	756.748	777.777	683.655	971.018	832.147	1035.76
SP_1411	conserved hypothetical protein	617.843	638.204	108.307	891.983	654.022	595.92	528.774	495.846	781.174	591.373	782.797
SP_1412	prolipoprotein diacylglyceryl transferase	531.235	817.196	154.082	542.651	386.143	480.197	500.866	525.827	709.329	676.526	744.324
SP_1413	Hpr(Ser) kinase/phosphatase	606.394	581.015	224.865	503.962	324.459	267.827	355.182	339.435	639.211	563.318	608.077
SP_1414	ribosomal protein S21	14163.6	15494.1	15562.3	560.175	837.381	266.064	475.696	338.547	1725.31	2067.83	1512.98
SP_1415	glucosamine-6-phosphate isomerase	86.3689	191.175	45.573	25.6801	41.0539	97.6021	129.903	106.117	270.094	328.719	237.747
SP_1416	S-adenosylmethionine:tRNA ribosyltransferase-isomerase	92.2261	65.2114	93.2718	96.3566	52.0142	102.813	123.111	110.411	221.086	280.922	221.261
SP_1418	IS1380-Spn1, transposase	138.95	43.3185	47.5014	33.4585	61.1303	69.9316	54.7199	55.4639	53.7757	63.3295	45.493
SP_1419	acetyltransferase, GNAT family	140.88	52.8533	197.054	416.395	313.259	316.695	326.654	335.969	182.616	286.386	196.626
SP_1420	NH(3)-dependent NAD(+) synthetase	151.777	91.9455	143.48	475.269	429.179	456.825	563.549	568.546	287.526	432.457	301.014
SP_1421	conserved hypothetical protein	351.845	191.704	214.595	533.666	307.164	266.159	345.211	315.122	178.773	245.686	191.732
SP_1422	hypothetical protein	10.7817	89.4939	39.2543	46.0824	117.873	55.0611	77.0624	58.2728	32.492	46.653	28.03
SP_1423	transcriptional repressor, putative	0	0	293.262	37.5572	68.6187	43.0914	82.4498	58.8101	32.4984	61.2822	31.7285
SP_1424	hypothetical protein	111.478	79.8321	0	0	40.9664	9.03065	10.6089	10.8615	9.26291	10.2442	9.83268
SP_1425	ABC transporter, ATP-binding protein	156.215	0	0	0	152.486	36.851	33.4192	29.2405	35.8764	33.9912	20.8401
SP_1426	peptidase, U32 family	3.58657	0	8.70537	0	22.4061	17.5616	24.6275	22.6744	25.2628	28.406	17.3832
SP_1427	conserved hypothetical protein	50.8345	20.093	61.693	12.4156	96.4065	19.3227	20.2107	30.0187	60.0238	114.673	28.5998
SP_1428	conserved hypothetical protein	185.881	9.35097	30.7617	144.451	65.9796	79.2229	86.0583	99.5491	192.128	312.256	143.272
SP_1429	peptidase, U32 family	141.331	36.2704	166.548	56.0293	67.1792	98.5612	115.682	125.281	226.431	373.921	152.064
SP_1431	type II DNA modification methyltransferase, putative	39.8408	110.233	72.5264	143.796	107.163	16.7459	25.3076	22.1565	55.3585	62.8649	55.6784
SP_1432	hypothetical protein	53.7986	0	87.0537	367.907	672.184	27.6687	28.5456	33.9339	71.458	65.2787	97.7507
SP_1433	transcriptional regulator, araC family	119.462	2.93807	103.097	77.1567	74.6306	12.0623	16.2955	17.9591	42.8456	55.3091	54.7332
SP_1434	ABC transporter, ATP-binding/permease protein	4.49085	14.9106	134.436	281.519	343.678	9.12409	13.5573	11.2729	18.5236	25.5309	23.8918
SP_1435	ABC transporter, ATP-binding protein	3.01962	43.445	159.411	462.043	624.878	10.441	13.0455	11.7987	20.4696	23.2044	26.9602
SP_1436	hypothetical protein	16.7373	0	81.2501	486.455	509.739	17.145	21.6362	20.3488	33.7065	41.441	47.1302
SP_1437	conserved domain protein	136.556	0	129.698	781.595	667.642	17.1351	26.0054	23.4417	32.6118	42.0179	45.1936
SP_1438	ABC transporter, ATP-binding protein	32.8052	90.7667	176.313	460.701	556.269	23.236	22.27	22.4409	16.5162	19.3605	25.1322
SP_1439	IS1380-Spn1, transposase	88.0667	32.4889	30.8759	26.7668	24.4521	60.5819	47.2576	50.8655	48.7885	54.9632	42.5758
SP_1442	IS66 family element, Orf2	0	0	0	0	23.4594	16.2165	18.3622	18.1894	29.8193	38.7364	37.8249
SP_1443	IS66 family element, Orf1	0	0	0	0	0	10.6911	15.5415	14.8083	27.2043	32.6838	36.0396
SP_1444	IS1167, transposase	29.3602	44.0991	40.722	7.17082	13.1014	25.4223	16.5168	25.8703	16.0728	23.8485	14.1691
SP_1445	GMP synthase	794.381	645.845	628.382	265.279	131.706	336.535	336.922	310.393	658.508	551.748	694.232
SP_1446	transcriptional regulator, GntR family	96.807	177.193	45.1868	38.1937	127.933	47.7307	74.1629	64.0736	96.5536	157.233	123.498
SP_1447	membrane protein	191.024	195.151	21.3995	140.682	64.2583	128.698	141.625	144.135	106.825	146.622	120.34
SP_1448	conserved hypothetical protein	67.5931	213.514	198.242	86.6704	158.351	166.442	178.255	195.572	136.539	187.541	140.812
SP_1449	cppA protein	272.327	208.967	317.278	192.442	181.471	236.24	237.145	253.926	324.759	332.871	328.626
SP_1450	platelet activating factor, putative	107.766	135.324	80.4836	184.243	168.31	176.527	182.367	158.64	89.4844	126.295	104.028
SP_1451	Cof family protein	162.37	119.801	92.7311	217.723	129.282	141.304	148.807	129.519	81.2081	102.315	82.5593
SP_1452	hypothetical protein	105.445	19.45	117.305	120.183	27.4475	136.398	140.33	126.844	62.3131	81.5789	67.739
SP_1453	conserved domain protein	128.466	11.3743	31.1815	122.994	32.1023	103.398	112.164	89.2456	44.4593	59.3788	47.2053
SP_1454	hypothetical protein	289.331	0	0	73.2823	635.978	137.736	169.016	139.827	79.5713	104.695	90.9261
SP_1455	hypothetical protein	185.353	0	0	93.8929	150.103	64.3103	97.6342	73.5126	45.9302	62.2355	53.0422
SP_1456	polypeptide deformylase	1180.23	853.322	731.848	692.23	538.186	621.439	701.719	602.93	1106.82	1116.01	1562.72
SP_1457	spoU rRNA methylase family protein	231.43	228.117	193.094	290.566	338.858	235.514	232.445	192.447	332.431	374.147	348.755
SP_1458	thioredoxin reductase	595.442	374.285	266.602	232.261	144.46	534.987	616.547	540.614	914.687	787.365	1008.08
SP_1459	hypothetical protein	133.475	363.149	539.953	190.163	34.7437	65.2425	88.9903	95.7049	267.737	276.751	190.083
SP_1460	amino acid ABC transporter, ATP-binding protein	285.226	188.226	249.402	169.613	348.627	265.991	234.892	289.12	725.432	485.109	471.528
SP_1461	amino acid ABC transporter, permease protein	273.157	364.232	235.648	354.472	195.319	233.214	235.485	281.809	615.966	442.819	404.446
SP_1462	conserved hypothetical protein	332.285	874.433	0	328.231	207.586	143.778	244.108	311.703	442.592	399.86	354.372
SP_1463	methylated-DNA--protein-cysteine S-methyltransferase	253.188	329.661	0	254.625	162.824	108.46	172.098	199.38	283.608	251.647	210.554
SP_1464	acetyltransferase, GNAT family	410.065	123.773	51.7046	145.676	49.9045	66.6849	121.866	134.646	266.265	285.531	203.367
SP_1465	hypothetical protein	247.69	450.353	0	141.154	230.264	278.839	472.41	450.95	759.699	994.144	441.464
SP_1466	hemolysin	427.151	778.901	256.728	333.841	324.033	647.555	656.703	566.946	1167.25	1170.04	509.88
SP_1467	conserved hypothetical protein	480.12	756.946	637.646	774.374	622.52	553.304	688.975	726.871	1891.78	2197.12	1558
SP_1468	pyridoxine biosynthesis protein	639.472	669.427	357.904	864.329	582.789	519.138	809.4	823.744	2239.07	3059.19	1911.17
SP_1469	NADH oxidase	1902.6	2086.65	1033.95	953.625	963.646	617.801	752.032	579.409	1757.36	1680.38	1504.63
SP_1470	thiamine biosynthesis protein ApbE, putative	542.061	179.976	231.978	590.184	409.93	103.656	87.8883	65.2087	105.773	101.065	159.828
SP_1471	oxidoreductase, putative	269.703	149.245	374.826	513.157	550.309	218.639	148.468	120.393	145.086	118.697	204.006
SP_1472	oxidoreductase, putative	319.723	234.337	79.6593	481.456	572.098	227.109	155.492	122.779	135.48	109.618	185.264
SP_1473	conserved hypothetical protein	745.882	463.634	496.003	331.901	143.621	216.928	321.726	197.919	459.123	379.386	410.099
SP_1474	glycyl-tRNA synthetase, beta subunit	295.707	323.689	219.878	243.375	163.715	205.793	301.25	178.142	339.235	278.414	301.052
SP_1475	glycyl-tRNA synthetase, alpha subunit	203.884	216.111	27.8799	117.826	67.2733	98.5598	160.135	105.843	197.005	173.815	174.423
SP_1476	hypothetical protein	121.668	52.3654	0	196.453	10.5567	43.411	69.6202	63.7245	74.5448	63.6581	62.5105
SP_1477	hypothetical protein	125.991	246.701	31.3649	154.647	20.182	34.9597	61.6416	59.3576	63.856	62.612	55.8489
SP_1478	oxidoreductase, aldo/keto reductase family	420.592	460.294	72.1058	176.425	205.124	176.697	288.495	323.78	253.959	279.708	266.605
SP_1479	peptidoglycan N-acetylglucosamine deacetylase A	801.065	785.965	496.431	586.021	337.178	749.829	674.738	702.947	866.116	790.141	757.666
SP_1480	hypothetical protein	830.488	296.494	52.0199	311.45	251.044	290.958	387.366	282.802	535.316	514.438	480.718
SP_1481	hypothetical protein	1635.38	405.209	0	709.413	228.729	227.102	258.263	188.512	488.525	413.995	409.052
SP_1482	oxidoreductase, Gfo/Idh/MocA family	122.642	208.819	71.9661	129.031	138.921	138.26	157.041	136.999	198.142	223.627	245.958
SP_1483	ATP-dependent RNA helicase, DEAD/DEAH box family	203.247	102.368	162.472	174.781	239.5	348.008	283.707	290.411	346.027	330.653	468.978
SP_1485	IS3-Spn1, transposase	0	0	0	0	9.8732	7.34888	12.0359	11.6731	9.18614	14.0454	10.4826
SP_1487	hypothetical protein	38.881	77.4558	0	0	36.4347	17.088	29.8937	22.9519	53.0291	60.9713	64.2328
SP_1488	hypothetical protein	280.439	0	0	0	29.1995	13.7476	20.91	21.7848	58.35	73.8979	92.181
SP_1489	translation elongation factor Tu	14301.6	16330.2	15442.9	11709.6	9630.7	12320.4	14834.1	10223.8	25312.9	21813.3	22851.2
SP_1490	hypothetical protein	329.516	0	0	0	0	7.46979	9.99911	14.6761	44.4233	61.5546	36.4514
SP_1491	glycerol uptake facilitator protein, putative	1175.65	1723.67	2081.33	1595.53	984.324	478.312	621.864	617.659	1191.98	1449.61	1135.51
SP_1492	cell wall surface anchor family protein	0	0	0	0	0	2.92536	1.89146	2.68863	1.83846	3.11275	2.6153
SP_1493	hypothetical protein	0	0	0	0	0	2.55705	1.63867	2.00713	2.58835	6.93027	3.3843
SP_1494	hypothetical protein	0	0	0	0	0	2.46064	2.52751	1.94125	5.13068	10.5614	4.10319
SP_1495	hypothetical protein	0	0	0	0	0	2.02883	1.97513	1.72372	3.00264	8.01628	3.20544
SP_1496	transposase, IS630-Spn1 related, Orf2	0	0	0	0	0	2.12889	2.14838	2.45394	3.77401	9.06432	4.224
SP_1498	phosphoglucomutase	637.946	721.314	480.162	734.102	507.755	459.881	519.397	481.552	771.327	773.711	748.576
SP_1499	bacterocin transport accessory protein	439.355	712.608	661.908	103.606	449.571	380.895	652.671	395.739	2428.34	1892.62	3385.11
SP_1500	amino acid ABC transporter, amino acid-binding protein	1442.47	887.102	542.759	613.837	708.322	142.207	238.758	239.162	604.638	550.635	622.773
SP_1501	amino acid ABC transporter, ATP-binding protein	805.484	259.333	451.954	293.304	254.87	110.428	198.622	189.405	422.629	428.563	427.549
SP_1502	amino acid ABC transporter, permease protein	568.698	415.812	274.077	203.581	230.867	58.9904	120.085	109.945	250.347	298.125	266.25
SP_1503	IS1380-Spn1, transposase	127.207	45.4844	45.1264	53.5336	42.7912	71.4122	52.2155	55.6618	57.1472	62.1939	47.2536
SP_1504	TPR domain protein	877.622	515.136	121.423	427.631	434.812	445.997	428.069	385.183	624.445	569.227	553.592
SP_1505	membrane protein	376.106	481.25	54.8281	239.439	148.174	210.374	249.773	220.553	442.986	451.827	407.537
SP_1506	conserved hypothetical protein	332.766	279.09	290.265	186.675	203.014	264.194	400.87	377.893	448.427	735.161	566.77
SP_1507	ATP synthase F1, epsilon subunit	3179.05	3841.38	2704.1	2264.16	2176.19	1364.01	1464.85	1248.85	4847.24	2981.14	4352.08
SP_1508	ATP synthase F1, beta subunit	2779.46	2798.27	1302.88	2277.45	1802.52	1655.55	1989.56	1712.91	3989.05	2918.26	3937.47
SP_1509	ATP synthase F1, gamma subunit	3196.94	2912.52	1514.08	1994.5	2365.36	1353.46	2059.8	1633.29	3707.65	3285.16	4123.59
SP_1510	ATP synthase F1, alpha subunit	2082.12	2129.04	1603.86	1283.83	1224.75	902.811	1218.99	945.194	2431.07	1986.47	2462.75
SP_1511	ATP synthase F1, delta subunit	1497.24	2442.12	1149.81	1216.94	1142.37	485.078	665.556	613.959	1488.29	1334.45	1598.2
SP_1512	ATP synthase F0, B subunit	2391.16	2448.93	2003.55	1702.59	1630.21	713.977	1166.64	1112.12	2211.77	2460.76	2505.82
SP_1513	ATP synthase F0, A subunit	2623.26	3023.3	1517.06	1225.71	1228.82	533.997	789.314	742.362	1957.01	1812.52	1833.81
SP_1514	ATP synthase F0, C subunit	4708.31	4985.88	2339.73	1345.33	1208.51	412.957	671.053	731.195	2108.81	2172.55	2279.56
SP_1516	acetyltransferase, GNAT family	221.214	176.818	74.5739	63.033	67.1792	54.2735	86.9453	96.0985	181.34	230.905	171.675
SP_1517	transcription elongation factor GreA	949.662	1277.54	801.461	513.203	622.257	452.595	583.189	620.109	986.374	996.593	1304.68
SP_1518	conserved hypothetical protein	727.483	976.024	583.433	680.383	599.171	491.707	544.241	647.84	976.601	1103.83	1182.25
SP_1519	acetyltransferase, GNAT family	354.147	377.212	264.986	610.019	316.062	362.376	295.537	401.965	305.631	447.485	332.871
SP_1520	acetyltransferase, GNAT family	192.749	545.855	433.443	629.991	540.096	465.007	411.244	488.578	404.401	543.212	457.552
SP_1521	UDP-N-acetylmuramate--alanine ligase	387.027	343.107	292.363	830.477	533.53	879.228	814.864	858.633	570.917	780.661	664.476
SP_1522	conserved domain protein	400.965	377.67	248.483	561.534	446.355	503.758	561.792	623.858	394.765	640.497	451.427
SP_1523	Snf2 family protein	162.472	116.738	140.398	311.219	207.251	256.865	207.187	232.313	133.68	171.854	123.46
SP_1524	aminotransferase, class II	9.03558	30	60.311	77.2384	35.2796	42.0536	41.4212	36.8929	39.8745	41.5844	44.0322
SP_1525	transulfuration enzyme family protein	7.22227	13.3219	0	86.4329	22.5596	28.3136	33.1869	30.7757	35.1092	38.8624	34.3675
SP_1527	oligopeptide ABC transporter, oligopeptide-binding protein AliB	82.0847	34.2535	251.496	184.047	191.25	73.228	108.543	88.461	141.013	126.077	155.306
SP_1528	hypothetical protein	0	0	0	0	0	17.9742	43.8532	33.9797	82.8186	85.3865	95.5487
SP_1529	polysaccharide biosynthesis protein, putative	233.77	339.458	293.765	334.471	346.978	491.118	370.762	348.701	324.573	352.311	363.533
SP_1530	UDP-N-acetylmuramoylalanyl-D-glutamate--2,6-diaminopimelate ligase	131.26	36.3174	70.7988	118.438	85.4175	109.42	146.5	142.658	183.533	218.905	242.813
SP_1531	hypothetical protein	1158.3	1119.85	1906.61	159.333	519.839	222.736	371.015	249.882	614.198	723.666	1004.92
SP_1533	conserved domain protein	416.231	284.357	62.363	307.486	80.2558	221.08	246.167	242.03	241.081	439.454	272.807
SP_1534	inorganic pyrophosphatase, manganese-dependent	597.072	582.877	587.891	288.901	299.107	263.885	286.656	284.273	685.41	785.627	697.479
SP_1535	conserved hypothetical protein	782.052	593.225	810.47	570.869	425.436	279.856	307.584	378.204	723.352	761.577	850.458
SP_1536	conserved hypothetical protein	653.76	424.01	511.876	450.686	516.013	300.629	344.856	405.409	670.885	757.062	784.579
SP_1537	general stress protein 13, putative	1017.84	1061.65	79.9805	312.976	583.259	288.365	360.616	385.544	821.826	785.574	760.094
SP_1538	cof family protein/peptidyl-prolyl cis-trans isomerase, cyclophilin type	655.74	553.93	137.012	289.52	314.441	163.752	200.998	220.697	489.849	455.623	422.541
SP_1539	ribosomal protein S18	9407.69	10496.9	2172.8	976.486	1664	1116.17	1465.01	1730.61	7554.42	6255.96	7139.97
SP_1540	single-strand binding protein	4984.02	6355.32	3579.6	1454.44	1914.33	997.67	1526.49	1718.06	8508.86	7250.51	7043
SP_1541	ribosomal protein S6	7115.74	7774.99	5343.03	1300.95	1428.97	656.572	964.533	900.798	6405.27	5358.67	5521.13
SP_1542	asparaginyl-tRNA synthetase	800.254	694.643	699.83	496.291	704.567	286.203	320.676	301.19	770.134	772.525	766.024
SP_1544	aspartate aminotransferase	406.07	567.292	290.838	421.095	436.665	232.733	280.471	239.187	382.96	438.161	371.572
SP_1545	conserved hypothetical protein	536.989	790.157	51.8392	219.083	266.851	76.5135	140.622	141.325	158.619	250.818	157.7
SP_1546	conserved domain protein	154.82	333.429	365.625	221.766	281.01	354.193	502.116	330.134	1092.39	815.415	1377.72
SP_1547	conserved hypothetical protein	50.6253	92.0474	17.554	24.729	124.248	63.7084	74.8481	72.9706	163.61	197.287	189.583
SP_1548	hypothetical protein	466.608	325.386	302.683	570.417	541.727	361.457	348.446	356.695	440.766	514.57	568.34
SP_1549	polypeptide deformylase	641.394	0	62.272	208.346	310.537	95.9351	130.991	136.162	225.553	296.206	300.543
SP_1550	glutathione S-transferase family protein	605.777	556.241	597.834	654.405	888.924	562.328	544.54	602.043	685.215	987.63	624.294
SP_1551	cation-transporting ATPase, E1-E2 family	574.283	654.711	532.621	758.532	577.447	326.83	360.706	385.954	480.823	831.562	437.723
SP_1552	cation efflux family protein	86.7587	312.677	113.39	53.2456	118.128	41.5661	50.5358	56.7481	134.336	209.21	118.141
SP_1553	ABC transporter, ATP-binding protein	537.928	460.535	415.284	546.505	499.245	392.475	384.325	393.633	465.246	546.281	505.01
SP_1554	polyA polymerase family protein	444.916	517.026	326.672	597.111	489.886	322.468	298.482	317.406	327.898	437.903	364.134
SP_1555	dihydrodipicolinate reductase	1218.52	1181.44	1316.35	751.143	1023.92	827.163	692.385	780.294	1092.4	1166.51	1143.63
SP_1556	hypothetical protein	1833.83	1934.43	463.655	2514.7	2983.42	1827.1	1391.58	1678.95	2203.06	2266.84	1974.18
SP_1557	degV family protein	864.737	738.826	915.678	865.275	640.118	627.186	596.736	591.554	833.113	911.128	896.657
SP_1558	hypothetical protein	1433.86	648.334	768.805	314.432	691.507	299.573	366.249	333.555	630.757	659.352	697.872
SP_1559	phosphoglucomutase/phosphomannomutase family protein	411.104	301.885	297.932	293.129	380.37	287.587	351.888	291.832	439.994	421.126	449.965
SP_1560	conserved hypothetical protein	239.955	258.087	0	271.567	279.753	188.368	275.474	241.164	352.886	329.252	343.733
SP_1561	conserved hypothetical protein	485.513	331.104	78.8395	175.364	64.0798	124.371	164.059	176.35	308.986	291.586	208.885
SP_1562	hypothetical protein	1151.41	335.345	533.204	181.31	23.6616	43.9816	81.0962	80.3878	126.017	177.62	111.313
SP_1563	pyridine nucleotide-disulphide oxidoreductase family protein	65.4939	75.5047	26.4946	18.6619	42.6203	57.2646	75.4219	57.8798	172.826	171.715	169.716
SP_1564	conserved hypothetical protein	260.144	326.3	189.428	474.406	374.694	801.16	828.377	844.81	553.811	645.219	632.109
SP_1565	conserved hypothetical protein	276.281	319.195	238.797	470.041	307.311	770.672	753.672	739.843	533.082	524.425	592.007
SP_1566	conserved hypothetical protein	210.062	337.265	287.248	480.529	258.764	582.694	633.233	596.021	474.667	449.063	551.444
SP_1567	endoribonuclease L-PSP	1020.55	375.217	1494.65	780.716	453.856	672.134	914.744	915.948	1192.69	1402.61	1523.85
SP_1568	GTP-binding protein	571.61	1156.08	554.967	674.496	616.168	751.705	1059.82	1072.59	1439.09	1349.13	1535.01
SP_1569	ATP-dependent Clp protease, ATP-binding subunit ClpX	329.249	461.405	565.637	537.314	373.98	490.426	579.953	602.44	870.553	763.058	914.536
SP_1570	hypothetical protein	308.319	904.255	299.342	553.474	361.151	313.011	523.823	513.948	816.893	837.624	880.357
SP_1571	dihydrofolate reductase	738.324	817.131	201.923	328.903	243.617	316.273	527.182	519.855	780.434	927.654	841.246
SP_1572	non-heme iron-containing ferritin	991.617	1070.29	1977.92	1812.81	2039.39	8943.24	8314.41	8679.33	14600.7	10936.3	11289
SP_1573	lysozyme	2106.4	2240.12	1426.94	2233.54	1964.93	1283.08	1731.51	1526	1343.13	1392.97	1342.62
SP_1574	triosephosphate isomerase	2167.25	2652.27	1218.15	1246.96	900.451	729.53	935.921	812.859	918.326	1079.16	1001.75
SP_1575	conserved hypothetical protein	653.2	529.281	353.896	538.43	625.463	371.275	299.422	351.112	267.78	297.22	244.277
SP_1576	homoserine O-succinyltransferase	546.753	657.596	111.719	491.224	435.674	261.893	318.52	328.093	225.083	307.899	218.895
SP_1577	adenine phosphoribosyltransferase	1048.29	1251.17	735.883	1247.51	947.019	795.424	775.844	641.767	551.682	734.029	707.921
SP_1578	methyltransferase, putative	229.229	374.778	67.4408	285.019	260.371	106.157	107.049	87.5453	132.248	95.3386	190.422
SP_1579	hypothetical protein	21.4319	1067.38	0	696.182	33.4726	135.823	129.438	106.083	123.755	125.633	201.89
SP_1580	sugar ABC transporter, ATP-binding protein	1312.24	2179.74	565.733	1187.48	1288.65	2791.71	2025.51	1101.21	1874.64	1735.27	3360.31
SP_1581	hypothetical protein	0	0	0	0	0	7.90408	4.46472	10.4298	24.6725	31.6197	27.397
SP_1582	IS1167, transposase	16.7773	0	0	0	6.55071	17.8098	14.4658	13.0866	9.21735	12.0647	8.28689
SP_1583	isochorismatase family protein	471.391	471.055	638.734	641.602	700.483	150.31	205.291	206.302	322.626	300.986	276.776
SP_1584	transcriptional regulator, putative	487.801	539.867	519.012	462.681	417.452	71.1903	102.37	104.631	174.223	186.89	168.241
SP_1585	hypothetical protein	286.536	401.685	0	0	179.005	24.764	16.4954	24.3739	91.1597	61.673	94.3534
SP_1586	ATP-dependent RNA helicase, putative	1487.95	1680.11	804.376	909.956	927.987	180.883	165.184	201.304	679.594	588.882	846.904
SP_1587	oxalate:formate antiporter	206.25	78.4658	127.76	473.826	325.478	25.5507	39.9657	44.4197	98.0054	100.444	138.864
SP_1588	oxidoreductase, pyridine nucleotide-disulfide, class I	268.217	467.421	208.909	225.856	181.316	990.301	1145.04	806.018	3063.53	2254.57	3957.88
SP_1589	Mur ligase family protein	264.79	247.467	99.9757	405.751	223.624	209.371	284.189	265.576	500.281	556.929	664.256
SP_1590	conserved hypothetical protein	457.872	398.688	310.525	351.109	415.393	335.039	441.41	415.718	755.991	735.791	998.043
SP_1591	proline dipeptidase	153.348	37.7147	59.0807	249.688	220.492	445.487	458.799	355.141	391.503	462.728	507.827
SP_1592	conserved domain protein	0	64.3567	188.19	88.3698	100.91	192.787	217.93	175.335	159.224	211.42	207.667
SP_1595	IS1380-Spn1, transposase	127.207	51.9822	21.3756	40.1502	30.5651	68.2263	52.3479	54.7384	55.3447	61.5825	47.642
SP_1596	IS3-Spn1, hypothetical protein, interruption	0	0	0	0	0	9.71073	11.9922	10.8013	16.132	22.2506	12.9478
SP_1597	conserved hypothetical protein	114.118	88.4091	55.3978	243.878	44.5576	36.8639	45.5024	48.6558	214.623	204.649	90.3633
SP_1598	phosphomethylpyrimidine kinase, putative	115.799	101.773	66.1338	133.925	31.9157	20.9762	34.0701	38.882	69.9541	106.379	33.7055
SP_1599	tRNA pseudouridine synthase A	133.564	159.49	0	132.201	21.958	22.9472	33.4233	36.3015	80.9987	163.506	30.6453
SP_1600	hypothetical protein	281.462	326.699	72.2047	78.2441	171.547	75.7095	85.4448	79.8149	214.8	378.406	134.826
SP_1601	conserved hypothetical protein	518.857	370.476	685.548	236.074	326.756	112.154	98.8211	122.053	551.625	673.204	294.204
SP_1602	phnA protein	567.662	413.098	651.169	319.07	376.492	94.2318	137.05	166.879	655.535	1089.23	364.786
SP_1603	cytidylate kinase	451.123	481.909	533.204	543.238	508.514	345.745	342.133	386.054	537.403	463.955	381.883
SP_1604	hypothetical protein	560.937	483.192	228.037	349.589	345.251	202.788	352.055	383.499	422.157	431.865	308.507
SP_1605	ferredoxin	789.565	761.087	633.662	370.129	258.563	115.782	223.318	198.793	344.948	391.701	304.571
SP_1606	glycosyl transferase, family 2	398.294	390.818	265.771	163.801	166.737	99.4576	138.056	123.818	221.633	225.305	156.337
SP_1607	UDP-glucose 4-epimerase	668.078	968.21	1229.5	764.399	815.352	379.773	613.283	520.007	978.073	1000.92	995.148
SP_1608	oxidoreductase, DadA family protein	109.839	68.7093	0	126.551	85.7734	73.6221	89.5697	92.1034	70.3639	74.6044	55.9486
SP_1609	conserved hypothetical protein	99.1026	197.425	0	163.783	144.46	68.2812	83.7219	95.0848	60.0153	70.9706	50.0138
SP_1610	Bcl-2 family protein	190.517	314.126	84.9351	86.4147	54.6521	34.4734	47.0856	48.4124	38.0555	56.5556	40.6385
SP_1611	hypothetical protein	150.636	0	0	0	0	1.28054	2.48141	1.69238	3.95373	13.4471	6.20037
SP_1612	conserved domain protein	0	0	0	0	4.14615	0.744723	0.870013	0.971454	2.28037	4.58166	1.93176
SP_1615	transketolase, authentic frameshift	0	20.7546	9.75373	13.7404	0	36.0338	24.9455	29.0168	8.86611	13.0669	10.8814
SP_1616	ribulose-phosphate 3-epimerase family protein	0	67.069	0	32.3769	0	23.6973	19.0525	21.2641	7.26606	9.84272	7.09902
SP_1617	PTS system, IIC component	16.9916	0	0	33.1997	22.7465	15.1666	13.7004	16.3861	5.71083	6.41638	5.30971
SP_1618	PTS system, IIB component	0	44.6101	0	27.5649	0	7.02435	10.8614	11.8389	5.50136	6.19694	5.40399
SP_1619	PTS system, IIA component	0	32.4167	0	0	0	5.97584	8.19737	9.05421	6.31797	9.29674	4.90863
SP_1620	PTS system, nitrogen regulatory component IIA, putative	0	0	0	0	0	7.46979	7.9913	10.2371	6.30468	10.788	6.15159
SP_1621	transcription antiterminator BglG family protein, authentic frameshift	0	0	0	0	0	6.95701	6.29452	6.0603	7.06338	9.37651	6.17813
SP_1622	transposase, IS200 family	183.528	332.374	134.988	133.114	191.09	25.2224	23.0287	24.6091	22.8511	60.0721	28.7209
SP_1623	cation-transporting ATPase, E1-E2 family	174.84	186.011	150.584	215.99	281.874	293.494	203.173	264.062	192.463	350.921	196.149
SP_1624	acyltransferase family protein	14.0594	206.17	17.0625	24.0366	10.979	31.9408	48.5442	42.614	97.3527	137.516	105.654
SP_1625	cadmium resistance transporter, putative	582.949	531.317	853.126	307.786	428.449	239.689	275.376	305.04	512.57	876.012	462.192
SP_1626	ribosomal protein S15	4491.18	6191.59	22193.1	4740.55	5459	2178.9	2444.23	2153.36	8682	8652.11	11023.4
SP_1627	conserved hypothetical protein	0	0	0	28.615	0	5.22886	5.55053	4.513	4.0935	5.85196	5.40687
SP_1628	hypothetical protein	0	0	0	171.69	19.6054	89.851	82.9967	66.184	179.176	187.014	211.92
SP_1629	hypothetical protein	50.212	250.072	365.625	515.07	352.896	281.078	274.914	188.942	434.071	392.331	475.657
SP_1630	hypothetical protein	260.233	512.433	295.313	69.3363	31.6702	117.592	189.733	170.962	260.762	472.122	391.398
SP_1631	threonyl-tRNA synthetase	230.526	91.5471	72.4104	213.288	127.072	228.837	282.895	144.662	436.697	393.41	434.492
SP_1632	sensor histidine kinase	2.70372	0	118.125	64.7139	33.7815	108.622	107.103	109.848	75.7512	85.9233	80.5452
SP_1633	DNA-binding response regulator	62.2096	0	0	79.7674	18.2174	61.9067	81.0244	70.7653	67.947	87.1955	82.683
SP_1634	hypothetical protein	2.4545	0	0	0	15.3338	29.8374	35.6361	26.8156	67.6089	70.675	85.8937
SP_1635	hypothetical protein	0	0	0	0	0	3.51302	2.80597	3.56069	6.14471	9.10401	9.24684
SP_1636	Rrf2 family protein	258.798	99.9144	277.558	277.82	159.797	281.141	392.701	344.126	256.742	327.376	324.882
SP_1637	conserved hypothetical protein	149.039	75.6008	143.193	159.253	281.264	175.778	210.655	179.688	173.987	189.081	211.631
SP_1638	iron-dependent transcriptional regulator	271.307	336.118	226.059	166.152	164.432	150.411	152.824	131.101	189.28	256.008	227.353
SP_1639	IS1167, transposase	14.4729	2.28824	10.0368	0	16.1456	8.71769	9.55075	9.59677	14.6126	22.1379	17.9537
SP_1640	hypothetical protein	0	0	0	86.3383	31.5488	18.653	18.7307	20.4252	25.2806	46.5839	24.2981
SP_1641	conserved domain protein	6.36746	98.6595	0	87.0891	29.8342	139.274	115.435	85.5999	117.171	127.325	125.215
SP_1642	hypothetical protein	42.5182	266.653	86.0006	48.4609	22.1351	271.262	217.492	158.592	138.719	191.253	172.635
SP_1643	hypothetical protein	24.4086	306.158	296.224	0	127.072	372.798	271.129	180.912	149.174	221.362	193.833
SP_1644	conserved hypothetical protein	160.305	433.683	417.916	548.132	491.458	648.282	590.897	574.579	347.453	397.859	376.997
SP_1645	GTP pyrophosphokinase	198.036	246.734	112.253	496.707	498.203	423.969	434.426	423.385	254.221	277.92	253.161
SP_1646	metallo-beta-lactamase superfamily protein	196.664	175.976	132.031	85.8449	137.237	169.173	197.098	161.34	478.021	475.939	558.292
SP_1647	endopeptidase O	836.933	688.919	834.874	1209.45	978.714	659.976	758.391	547.333	1229.94	1168.81	1119.43
SP_1648	manganese ABC transporter, ATP-binding protein	8424.31	9220.6	7456	9668.24	8575.92	2720.86	2871.17	2255.13	10524.1	10229.7	5574.88
SP_1649	manganese ABC transporter, permease protein, putative, authentic frameshift	8267.01	6633.97	4925.07	9135.81	7555.33	3788.08	3500.19	2904.25	10133.5	9872.2	5460.27
SP_1650	manganese ABC transporter, manganese-binding adhesion liprotein	10272.4	9094.45	7777.89	10448.2	10146.7	3964.58	4231.7	3558.49	10776.3	10797.9	6419.69
SP_1651	thiol peroxidase	228.566	500.304	394.509	277.88	142.79	350.649	724.652	366.355	1199.68	934.04	1766.19
SP_1652	hypothetical protein	64.5971	58.8757	62.2551	134.8	154.299	261.79	251.703	226.307	75.5936	93.1731	113.626
SP_1653	ABC transporter, ATP-binding protein	63.8379	49.8718	0	160.501	93.8376	176.594	205.852	173.414	60.1225	67.7142	75.1033
SP_1654	conserved hypothetical protein	45.9028	8.46705	31.8331	76.6091	34.1387	79.9983	73.8641	64.9586	45.5792	52.6736	65.0258
SP_1655	phosphoglycerate mutase	2788.29	3957.36	1569.6	682.857	819.86	593.509	920.418	643.616	1857.04	1829.56	1436.37
SP_1656	hypothetical protein	111.582	15.4365	0	0	0	3.55704	7.69093	4.49957	13.1791	10.3758	14.6398
SP_1657	hypothetical protein	82.0129	6.48334	0	0	0	5.27865	7.19174	5.8669	14.2574	13.0154	14.7259
SP_1658	hypothetical protein	0	0	0	0	0	3.77783	8.09123	7.24609	11.7124	12.7229	18.7526
SP_1659	isoleucyl-tRNA synthetase	366.68	331.131	155.78	222.68	225.535	168.953	239.475	120.625	334.279	263.666	261.447
SP_1660	hypothetical protein	2245.59	2665.37	7089.63	2197.79	2083.98	2891.43	2790.27	3545.45	4007.29	3889.7	4513.28
SP_1661	cell division protein DivIVA	1521.87	1397.74	806.901	1182.41	1111.47	1296.17	1374.75	1454.78	2024.94	1544.3	2119.13
SP_1662	ylmH protein	1693.7	1603.51	1359.47	1186.92	885.234	853.951	918.409	952.72	1294.86	1242.77	1338.15
SP_1663	ylmG protein	2526.29	2022.36	278.72	990.143	483.45	536.382	616.828	568.1	1212.93	961.648	951.765
SP_1664	ylmF protein	1945.37	1569.51	574.675	1368.75	998.784	812.402	1180.01	1111.51	1625.2	1629.2	1477.78
SP_1665	ylmE protein	1474.98	1606.36	795.045	1381.57	1145.69	881.269	1093.39	1029.63	1521.53	1311.93	1326.49
SP_1666	cell division protein FtsZ	1782.53	1671.77	789.649	1223.29	1218.8	1457.03	1613.88	1593.69	1987.32	1738.56	1937.57
SP_1667	cell division protein FtsA	1259.55	1060.62	796.313	731.463	803.049	769.658	958.797	914.622	1163.52	1227.24	1043.93
SP_1668	hypothetical protein	467.399	281.404	235.971	76.7125	105.118	81.675	111.65	116.612	372.851	400.588	403.733
SP_1669	MutT/nudix family protein	103.378	66.7402	0	103.098	60.5459	82.9367	96.0587	95.1961	138.956	177.774	123.286
SP_1670	UDP-N-acetylmuramoylalanyl-D-glutamyl-2,6-diaminopimelate--D-alanyl-D-alanyl ligase	65.2317	161.376	37.2544	124.644	95.8864	71.5665	84.2745	78.7527	118.952	150.022	111.163
SP_1671	D-alanine--D-alanine ligase	431.78	408.003	453.53	207.212	126.195	88.5214	118.111	108.655	250.962	387.41	273.271
SP_1672	recombination protein RecR	558.577	410.503	675.213	468.049	448.263	470.034	481.404	472.462	641.772	607.646	610.884
SP_1673	penicillin-binding protein 2B	280	219.919	241.155	330.9	253.92	240.953	284.605	269.649	396.311	412.287	375.095
SP_1674	phosphosugar-binding transcriptional regulator, putative	64.975	95.8803	105.139	116.374	125.64	152.894	232.398	201.253	566.87	671.062	861.393
SP_1675	ROK family protein	862.327	2299.39	36.1494	381.937	358.213	1078.25	658.94	497.3	396.89	354.876	375.319
SP_1676	N-acetylneuraminate lyase, putative	864.352	1751.14	188.19	378.026	466.428	865.373	493.088	374.632	418.375	349.98	363.094
SP_1677	hypothetical protein	519.052	1282.34	39.6803	132.76	121.28	362.719	170.956	145.151	115.541	148.856	107.263
SP_1678	hypothetical protein	1957.13	4891.97	0	591.81	540.632	502.174	326.62	258.6	200.391	302.936	206.209
SP_1679	conserved hypothetical protein	2032.49	3285.36	0	300.457	513.149	519.865	366	282.664	235.885	305.807	221.191
SP_1680	sugar ABC transporter, permease protein	936.903	1661.62	14.1246	437.752	263.569	338.565	171.307	122.893	115.692	127.705	94.0834
SP_1681	sugar ABC transporter, permease protein	1142.32	2698.69	220.899	493.608	519.542	1076.48	560.179	395.109	275.698	300.629	259.807
SP_1682	sugar ABC transporter, sugar-binding protein	969.814	1866.94	49.9321	527.559	711.432	855.004	472.39	318.113	258.529	291.888	224.388
SP_1683	PTS system, IIBC components	1880.4	3726.46	317.756	1868.53	2097.29	3473.62	2370.39	1325.44	696.446	604.196	496.729
SP_1684	conserved hypothetical protein	1449.18	2053.59	189.677	1802.15	1714.11	1885.08	1509.77	826.856	607.521	489.25	297.512
SP_1685	conserved hypothetical protein	1189.84	1527.62	128.152	2630.61	2597.5	1675.29	1649.41	782.942	1013.55	864.312	529.842
SP_1686	oxidoreductase, Gfo/Idh/MocA family	482.335	1160.13	57.9569	538.864	626.519	3793.31	1806.35	1580.7	260.181	178.506	285.388
SP_1687	neuraminidase B	608.677	1213.54	79.4458	688.727	774.664	3151.62	1626.09	1326.44	267.713	193.087	237.155
SP_1688	ABC transporter, permease protein	657.452	1054.71	153.44	778.163	863.905	3482.85	1829.12	1211.72	370.885	252.097	293.528
SP_1689	ABC transporter, permease protein	631.48	1539.52	151.827	1054.15	1242.12	3530.86	2314.41	1271.1	552.669	412.784	418.183
SP_1690	ABC transporter, substrate-binding protein	511.267	1297.39	210.412	1269.87	1710.85	2605.87	1856.37	924.944	865.352	610.645	598.628
SP_1691	conserved hypothetical protein	459.722	1239.78	98.8722	1870.4	1690.47	1364.67	953.618	428.754	1180.25	606.491	644.828
SP_1692	IS1167, transposase	45.0889	42.9386	35.6317	28.6833	26.2029	37.0459	20.1278	29.0915	18.775	25.6374	16.7865
SP_1694	hypothetical protein	11.562	447.862	0	316.271	216.691	29.3386	34.2827	33.0125	51.9754	33.1426	19.5801
SP_1695	acetyl xylan esterase, putative	67.1797	8.92202	26.0895	18.3766	92.331	76.4683	74.5761	63.7099	97.46	102.882	108.969
SP_1696	hypothetical protein	97.6344	513.264	148.112	208.651	152.486	34.2366	55.995	67.5775	229.819	213.05	177.83
SP_1697	ATP-dependent DNA helicase RecG	473.353	542.69	314.209	308.505	267.531	206.253	230.517	243.002	363.866	399.002	305.411
SP_1698	alanine racemase	428.61	369.973	127.505	506.205	324.447	274.921	285.242	293.464	405.638	402.639	336.619
SP_1699	holo-(acyl-carrier protein) synthase	551.917	450.083	317.278	260.727	238.181	179.429	257.337	245.744	362.291	420.01	333.398
SP_1700	phospho-2-dehydro-3-deoxyheptonate aldolase	554.302	539.964	539.404	397.407	526.609	444.246	525.07	584.472	824.2	898.172	780.51
SP_1701	phospho-2-dehydro-3-deoxyheptonate aldolase	403.594	610.64	279.002	550.256	343.094	303.83	419.152	435.344	564.541	648.217	563.429
SP_1702	preprotein translocase, SecA subunit	796.396	541.954	1096.95	627.447	537.159	473.712	475.463	508.975	720.695	785.587	732.742
SP_1703	conserved domain protein	82.3791	531.836	55.542	62.5953	214.434	321.785	148.463	113.398	99.2425	108.401	128.609
SP_1704	ABC transporter, ATP-binding protein	262.364	313.413	80.865	277.674	539.844	389.527	218.889	182.091	182.44	211.738	198.812
SP_1705	hypothetical protein	143.714	227.22	59.7985	287.821	378.365	218.038	121.517	101.661	118.393	130.715	127.774
SP_1706	hypothetical protein	199.707	119.721	24.2365	125.191	233.927	146.425	97.013	72.3427	109.98	115.78	127.736
SP_1707	hypothetical protein	233.286	240.974	169.87	425.426	303.623	139.249	85.555	74.3971	171.111	163.516	173.494
SP_1708	hypothetical protein	420.253	152.217	129.823	496.408	286.409	102.369	84.8223	73.9495	218.054	214.671	167.241
SP_1709	phosphoglycerate dehydrogenase-related protein	647.47	507.392	292.835	354.086	244.955	307.33	394.792	435.419	661.436	630.92	691.636
SP_1710	nitroreductase family protein	635.034	210.436	268.842	574.404	444.004	445.002	538.094	576.563	658.003	629.892	681.796
SP_1711	primosomal protein DnaI	523.112	572.442	303.159	351.706	367.191	348.957	413.624	404.953	480.973	460.664	512.814
SP_1712	hypothetical protein	354.864	406.455	341.797	292.753	295.588	244.444	309.599	286.662	361.897	358.729	393.495
SP_1713	conserved hypothetical protein	622.883	461.63	80.993	247.212	173.718	166.227	285.023	229.97	487.543	420.229	505.35
SP_1714	transcriptional regulator, GntR family	381.735	2000.8	812.917	923.537	1248.64	113.945	262.422	190.323	1045.96	1198.91	214.44
SP_1715	ABC transporter, ATP-binding protein	673.737	1642.2	653.256	810.564	1046.68	229.586	380.146	270.686	1083.79	1037.23	203.438
SP_1716	conserved hypothetical protein	224.071	138.581	42.6563	169.007	68.6187	76.8642	108.493	107.699	176.068	147.197	99.545
SP_1717	ABC transporter, ATP-binding protein	221.152	163.171	21.4713	120.99	128.948	57.9661	88.2606	86.862	214.241	157.233	124.554
SP_1718	hypothetical protein	0	0	0	0	0	3.7349	5.781	6.96861	41.6868	25.2499	6.61069
SP_1720	conserved hypothetical protein	230.341	146.347	20.7069	116.682	46.6341	60.3567	95.6808	80.4905	208.1	272.81	223.691
SP_1721	fructokinase	83.1212	236.554	122.493	50.7529	83.4552	68.8559	72.4414	58.3326	89.6894	97.9632	95.1919
SP_1722	PTS system IIABC components	41.9766	18.5828	13.5848	62.1966	78.6712	74.8942	51.0237	50.3873	19.3976	33.5859	25.5901
SP_1723	hypothetical protein	0	0	0	0	0	1.52791	1.38516	0.833367	0.953033	3.16934	1.1156
SP_1724	sucrose-6-phosphate hydrolase	86.9651	38.098	83.5536	58.8525	147.141	80.6276	93.5693	100.313	72.0477	98.5412	71.4241
SP_1725	sucrose operon repressor	152.819	51.3432	0	167.957	85.2407	97.3973	111.138	119.084	71.0004	107.403	85.5078
SP_1726	3-hydroxy-3-methylglutaryl-CoA reductase	358.72	311.2	316.158	243.901	248.642	255.274	255.375	272.901	459.561	564.326	552.462
SP_1727	hydroxymethylglutaryl-CoA synthase	601.223	672.707	323.397	436.755	268.284	244.959	233.271	224.346	368.121	425.42	427.917
SP_1728	hypothetical protein	27.4597	30.3906	111.084	172.137	71.4778	90.4934	94.3725	113.045	177.868	240.09	174.708
SP_1729	IS1381, transposase OrfA/OrfB, truncation	135.839	98.6595	123.641	333.841	59.6685	94.04	106.26	109.064	182.4	219.576	179.927
SP_1730	hypothetical protein	120.09	136.15	56.8751	200.305	219.58	101.739	115.86	116.943	183.054	238.2	171.957
SP_1731	conserved hypothetical protein	316.058	38.4388	16.8602	154.385	130.186	52.9676	66.2166	60.1696	116.767	150.354	104.386
SP_1732	serine/threonine protein kinase	528.557	590.868	807.884	1106.23	983.535	1001.95	1049.35	1055.74	818.338	961.387	903.076
SP_1733	phosphatase, putative	860.922	795.324	807.361	1259	1011.22	763.114	865.94	881.491	836.275	1088.88	927.78
SP_1734	rRNA methyltransferase RsmB	361.114	404.098	267.819	439.024	476.258	481.887	429.76	451.667	334.989	423.865	325.139
SP_1735	methionyl-tRNA formyltransferase	118.288	264.944	205.078	462.242	329.898	405.739	367.542	365.624	273.266	339.102	260.026
SP_1736	primosomal protein N	151.767	205.698	93.4274	266.99	267.948	241.132	199.712	212.696	157.757	238.88	150.009
SP_1737	DNA-directed RNA polymerase, omega subunit, putative	557.643	547.032	256.348	491.132	488.249	221.364	334.827	394.128	491.952	772.051	507.134
SP_1738	guanylate kinase	777.805	711.926	984.768	244.391	131.328	140.443	209.48	209.624	340.263	481.761	294.369
SP_1739	KH domain protein	952.62	841.622	1180.02	763.779	559.211	210.25	245.237	293.232	767.351	822.199	767.071
SP_1740	conserved hypothetical protein	25.8444	91.5295	200.735	88.3698	16.1456	25.3534	37.4824	37.1825	71.3362	121.763	54.162
SP_1741	conserved hypothetical protein	155.066	91.5295	50.1839	35.3479	32.2912	21.1351	29.0932	31.1098	74.4442	121.558	56.4416
SP_1742	conserved hypothetical protein	452.56	358.709	168.994	147.766	239.978	333.232	292.958	293.657	241.243	253.422	254.103
SP_1743	conserved hypothetical protein	326.428	230.432	231.269	180.998	209.439	205.329	215.077	217.392	177.417	200.041	190.945
SP_1744	iojap-related protein	666.479	717.013	578.39	700.218	639.666	454.613	539.032	562.966	492.363	573.98	563.321
SP_1745	isochorismatase family protein	768.213	163.054	523.625	944.551	821.781	538.608	617.8	654.985	498.782	564.458	522.298
SP_1746	conserved hypothetical protein	470.42	277.506	355.469	735.969	797.086	722.137	731.017	735.542	596.493	626.165	588.702
SP_1747	conserved hypothetical protein	688.323	564.977	457.032	758.297	418.248	616.934	636.743	583.426	509.851	572.621	595.881
SP_1748	conserved hypothetical protein	650.583	243.125	297.364	664.473	607.012	743.855	807.884	764.458	518.806	683.804	627.079
SP_1749	GTP-binding protein	434.592	353.157	161.84	492.62	431.424	611.217	603.66	507.529	388.174	504.707	467.244
SP_1750	conserved hypothetical protein	499.267	314.958	284.779	503.607	538.033	602.549	554.107	478.962	433.63	516.033	477.336
SP_1751	magnesium transporter, CorA family, putative	316.104	346.634	225.248	366.895	425.753	464.582	408.073	367.771	449.283	487.733	427.043
SP_1752	conserved domain protein	239.253	187.76	126.702	208.238	169.848	188.335	182.366	158.514	259.759	252.345	229.348
SP_1754	conserved hypothetical protein	82.8972	97.8617	13.4139	99.2076	125.154	41.6711	61.8238	57.131	108.249	223.963	100.159
SP_1755	hypothetical protein	316.336	0	0	100.152	73.1933	445.1	420.717	400.247	50.7115	65.7744	92.2305
SP_1756	conserved domain protein	373.452	210.708	0	200.305	137.237	1243.53	1207.05	1182.55	110.005	153.106	224.699
SP_1757	conserved hypothetical protein	90.6293	78.4978	81.2956	94.3139	61.5415	921.674	815.507	793.453	83.4814	104.276	147.702
SP_1758	glycosyl transferase, group 1	52.3042	108.056	97.3308	92.4025	95.3038	609.737	598.187	577.372	56.9097	75.8472	99.4412
SP_1759	preprotein translocase, SecA subunit	18.885	124.175	41.7935	93.062	95.4243	624.063	650.183	646.617	36.3512	55.8807	54.7872
SP_1760	conserved domain protein	107.597	185.238	14.5089	173.734	177.382	633.738	628.531	643.448	31.4929	49.1814	46.4764
SP_1761	hypothetical protein	130.434	132.009	12.497	55.7489	67.0105	514.577	607.455	613.965	28.3215	46.1829	40.3493
SP_1762	hypothetical protein	56.691	88.5769	30.3531	31.357	62.499	583.721	600.174	621.29	22.1364	34.6064	31.1195
SP_1763	preprotein translocase SecY family protein	43.2862	79.0456	97.1849	59.2034	60.8442	487.892	516.514	531.296	16.2466	27.6176	20.8174
SP_1764	glycosyl transferase, family 2	82.9246	125.588	21.1869	119.387	90.8857	390.606	560.783	627.734	16.3985	26.0316	18.2598
SP_1765	glycosyl transferase, family 8	46.2479	143.803	0	105.424	154.779	640.343	731.627	762.036	25.2126	36.643	32.4296
SP_1766	glycosyl transferase, family 8	49.6568	26.2838	41.9226	92.278	87.6701	587.269	555.508	546.03	32.5165	45.495	44.1605
SP_1767	glycosyl transferase, family 8	70.0812	66.8221	81.1255	90.3215	84.1948	874.892	818.039	768.692	45.0926	68.6989	71.9271
SP_1768	conserved hypothetical protein	11.7335	40.4006	69.6171	80.2408	77.3742	696.597	787.301	743.252	42.4063	72.1307	75.4233
SP_1770	glycosyl transferase, family 8	32.5448	141.673	36.8635	81.6057	115.212	469.029	412.024	439.746	31.4346	44.3424	54.4446
SP_1771	glycosyl transferase, family 2/glycosyl transferase family 8	79.4243	86.5065	32.1299	90.5252	108.294	2099.77	1455.19	1445.32	78.8915	125.133	139.658
SP_1772	cell wall surface anchor family protein	22.8093	21.2741	22.7703	66.0415	56.883	1607.42	1144.26	796.27	47.3119	82.2891	82.9958
SP_1774	transcriptional regulator, putative	513.532	568.345	318.537	565.796	338.638	264.596	311.631	284.297	868.05	1185.73	790.497
SP_1775	conserved domain protein	1074.46	741.411	1108.64	1591.53	1712.07	1365.97	1890.59	1375.47	3423.43	4376.27	4435.68
SP_1776	thioredoxin	2870.45	1342.98	3605.47	2317.81	3097.65	3346.65	3271.76	2296.39	3770.86	4017.77	4970.56
SP_1777	conserved hypothetical protein	51.0219	0	13.7601	0	17.7081	51.9753	51.6673	56.7492	71.6927	234.789	76.6546
SP_1778	aquaporin	1654.97	1766.2	478.21	316.625	332.324	499.069	400.344	376.762	805.837	700.773	697.698
SP_1779	hypothetical protein	375.919	530.455	410.595	401.681	300.895	335.741	267.881	279.129	252.61	288.294	261.816
SP_1780	oligoendopeptidase F, putative	246.45	258.143	238.562	348.611	499.462	422.28	387.842	360.845	280.59	341.447	255.157
SP_1781	conserved hypothetical protein	191.332	199.99	68.8005	266.535	426.1	395.342	352.614	324.418	189.58	246.06	162.025
SP_1782	ribosomal protein L11 methyltransferase	113.65	69.0261	13.4562	270.127	186.158	223.575	255.069	245.288	141.105	168.389	108.201
SP_1783	MutT/nudix family protein	258.083	278.829	134.233	567.297	326.299	205.08	250.927	252.111	154.333	183.304	124.143
SP_1784	hypothetical protein	204.548	206.288	41.1287	115.879	162.568	154.561	162.416	160.473	112.215	128.25	89.7602
SP_1785	hypothetical protein	251.86	192.022	27.1696	57.4122	43.7062	82.1915	111.335	109.654	120.191	140.783	101.817
SP_1786	conserved hypothetical protein	276.415	405.745	84.7476	258.672	209.037	602.778	749.708	859.805	584.18	823.806	769.041
SP_1787	hypothetical protein	420.253	112.754	432.745	413.673	338.121	422.26	722.288	770.338	694.819	1146.37	847.384
SP_1788	hypothetical protein	0	0	121.875	42.9225	78.4214	53.9959	55.2441	54.3978	161.384	261.346	164.531
SP_1789	hypothetical protein	201.866	157.703	115.287	40.6023	92.728	23.5198	26.8702	25.1569	83.3569	108.887	89.4969
SP_1790	ATPase, AAA family	118.128	73.3963	140.846	127.553	207.151	133.514	131.622	117.947	262.935	359.08	288.074
SP_1791	integrase-related protein	0	0	0	0	0	3.54336	3.86779	4.5564	4.08582	11.9561	6.95554
SP_1792	IS1167, transposase	0	30.173	0	0	0	5.75834	7.1129	6.49283	7.7662	12.4079	13.0593
SP_1793	hypothetical protein	22.8831	151.953	311.035	665.075	714.778	6655.1	5962.02	6661.46	795.687	1070.24	4435.73
SP_1794	hypothetical protein	210.395	308.187	165.218	402.02	212.621	912.867	759.82	871.425	289.046	337.365	583.25
SP_1795	sucrose-6-phosphate hydrolase, putative	7.98827	0	0	0	6.23807	4.06594	3.61526	2.84627	2.1062	3.75369	1.96404
SP_1796	ABC transporter, substrate-binding protein	0	0	0	16.723	2.54615	3.83884	3.17173	2.72381	2.5129	3.46849	2.37978
SP_1797	ABC transporter, permease protein	0	0	0	0	0	2.09935	1.68799	1.89424	1.72667	2.56344	1.59568
SP_1798	ABC transporter, permease protein	0	0	17.425	0	4.48488	1.63554	1.41911	1.45179	1.49371	2.32134	1.63368
SP_1799	sugar-binding transcriptional regulator, LacI family	199.946	145.584	121.328	107.949	61.6336	80.3897	91.7899	110.992	289.19	308.846	213.869
SP_1800	transcriptional activator, putative	10.6726	0	0	6.08213	0	2.70667	4.05285	4.95037	24.2858	19.478	36.1793
SP_1801	conserved hypothetical protein	4185.85	3226.93	232.671	2567.54	2120.94	1515.55	2382.25	2266.63	3135.33	2135.34	3136.47
SP_1802	hypothetical protein	1929.94	1227.08	547.162	1376.44	1278.97	1548.77	1359.89	1463.99	1948.11	967.35	2043.93
SP_1803	conserved hypothetical protein	2212.19	1706.14	168.38	2003.05	1709.45	2024.9	1425.36	1522.77	2235.57	907.12	2008.8
SP_1804	general stress protein 24, putative	2900.18	1621.63	677.668	3093.38	3839.94	3317.27	3118.65	3072.85	2980.15	1467.99	3366.49
SP_1805	hypothetical protein	5466.09	3224.98	266.602	4219.66	4379.49	4475.78	6168.06	6088.32	4664.91	2443.73	6128.34
SP_1806	conserved domain protein	0	0	0	0	68.6187	42.2043	48.6242	49.502	39.9416	54.2552	61.2771
SP_1807	acetyltransferase, GNAT family	0	45.6879	100.199	0	18.4211	31.308	38.9611	36.4031	35.7701	41.3264	45.7485
SP_1808	type IV prepilin peptidase, putative	135.801	4.42046	0	34.1429	24.9523	36.7208	31.4777	39.9247	21.4432	42.905	35.5993
SP_1809	transcriptional regulator	201.371	60.7813	183.289	187.786	293.059	282.948	283.558	342.75	145.457	305.151	229.042
SP_1810	hypothetical protein	273.697	55.7992	96.1515	209.335	230.604	158.932	208.412	247.25	112.653	284.653	180.675
SP_1811	tryptophan synthase, alpha subunit	61.0686	131.419	20.587	104.406	169.56	42.8864	84.2021	49.3174	840.984	785.119	94.2175
SP_1812	tryptophan synthase, beta subunit	125.991	222.865	67.9573	294.566	127.819	52.078	103.061	54.183	818.751	808.402	87.3447
SP_1813	N-(5-phosphoribosyl)-anthranilate isomerase	144.987	247.988	0	368.06	150.961	48.9645	105.179	51.2367	667.979	715.667	65.5495
SP_1814	indole-3-glycerol phosphate synthase	123.569	174.746	149.964	193.654	203.712	53.2369	94.8844	47.5981	680.665	643.65	60.7019
SP_1815	anthranilate phosphoribosyltransferase	91.8055	66.7687	171.898	215.253	143.382	51.051	92.1845	46.9319	702.229	691.805	60.3264
SP_1816	anthranilate synthase component II	67.4143	82.3281	84.6355	190.767	108.919	43.4157	67.5737	37.3845	625.43	619.344	44.883
SP_1817	anthranilate synthase component I	52.2581	35.3442	117.446	281.265	172.303	24.4578	40.968	25.2365	386.203	430.784	27.3059
SP_1818	hypothetical protein	777.874	414.508	4510.38	2536.65	2272.29	553.561	662.573	494.812	1166.37	1706.92	363.509
SP_1819	hypothetical protein	219.677	379.883	1099.73	1643.13	814.847	100.842	139.988	111.194	555.749	499.246	105.721
SP_1820	hypothetical protein	1016.01	2431.25	2299.44	2675.95	1329.49	135.74	319.686	223.182	693.344	807.699	188.554
SP_1821	sugar-binding transcriptional regulator, LacI family	189.422	296.991	83.0137	170.919	90.3959	46.6974	70.755	70.2159	133.358	130.005	86.601
SP_1822	conserved domain protein	0	0	0	0	0	0.06073	0	0.0343979	0.136369	0.0708593	0.126024
SP_1823	MgtC/SapB family protein	25.9535	24.6203	0	0	0	9.51847	11.9387	8.72966	18.932	22.0099	12.2961
SP_1824	ABC transporter, permease protein	28.0439	0	0	5.32726	0	3.97329	5.27613	4.14092	9.1748	10.9873	5.53114
SP_1825	ABC transporter, ATP-binding protein	0	8.65728	0	17.8313	16.2893	4.64369	6.71411	4.75824	11.6841	20.0694	9.77432
SP_1826	ABC transporter, substrate-binding protein	7.40486	0	0	16.8796	15.4199	7.218	12.0054	7.03572	16.4082	22.842	13.0299
SP_1827	hypothetical protein	0	0	67.8623	6.82857	24.9523	3.08978	4.38403	2.67318	9.18724	8.89396	6.65835
SP_1828	UDP-glucose 4-epimerase	0	0	0	0	0	3.40241	6.89044	3.35211	3.39698	4.13801	4.2777
SP_1829	galactose-1-phosphate uridylyltransferase	16.074	0	0	0	22.315	4.01577	6.50349	4.9103	4.82405	5.60674	4.88342
SP_1830	phosphate transport system regulatory protein PhoU, putative	0	0	0	0	0	0.698112	1.02528	1.22579	1.1757	1.48655	1.4849
SP_1831	hypothetical protein	0	0	0	0	34.0963	1.90225	2.81075	2.18117	3.22966	3.9789	4.35663
SP_1832	hypothetical protein	0	0	0	0	0	2.1504	4.06313	4.31641	4.5322	3.91766	5.51927
SP_1833	cell wall surface anchor family protein	18.5905	20.5748	9.0246	0	0	1.91749	4.71286	3.40743	4.16969	5.57484	4.17585
SP_1834	hypothetical protein	0	0	0	0	0	2.08572	4.45229	2.52757	1.79715	3.79189	2.46606
SP_1835	hypothetical protein	0	370.476	0	0	0	3.82382	4.24452	3.62652	1.99683	5.08415	2.86029
SP_1836	hypothetical protein	610.629	1483.48	0	1094.89	1256.07	667.534	735.547	749.378	965.678	1550.65	1048.09
SP_1837	capsular polysaccharide biosynthesis protein, putative	594.042	676.47	727.451	756.653	912.679	460.15	509.183	457.924	682.675	968.933	715.373
SP_1838	glycosyl transferase, putative	736.062	471.515	489.347	715.375	647.571	276.576	332.438	296.44	449.578	803.353	510.44
SP_1839	ABC transporter, ATP-binding/permease protein	172.281	258.112	231.907	391.006	401.843	221.919	245.544	204.44	322.292	436.158	369.779
SP_1840	ABC transporter, ATP-binding/permease protein	197.785	434.45	208.884	258.125	294.754	159.792	168.335	162.593	262.704	369.309	272.778
SP_1841	ABC transporter, ATP-binding/permease protein	184.808	339.603	0	107.306	87.1349	56.5867	84.2011	73.4034	158.548	234.424	159.284
SP_1842	conserved domain protein	323.735	627.007	112.253	158.135	144.46	102.808	163.955	150.421	289.341	437.161	314.506
SP_1843	hypothetical protein	315.786	592.618	33.3252	46.9465	85.7734	72.4803	117.561	109.872	280.823	387.712	250.316
SP_1844	hypothetical protein	80.9338	294.309	14.0317	19.7669	36.1151	24.2768	43.8457	41.53	125.083	184.291	114.676
SP_1845	exodeoxyribonuclease	192.616	137.419	50.2293	81.646	338.121	195.351	268.647	220.269	682.467	701.266	686.141
SP_1847	xanthine phosphoribosyltransferase	36.2355	0	0	100.669	113.186	3.85041	4.00553	5.23415	12.9259	16.3307	9.34849
SP_1848	xanthine permease	54.2671	0	141.85	189.124	309.681	3.94781	4.40816	5.44696	12.0721	16.417	9.52699
SP_1849	DpnD protein	39.9414	202.078	62.3225	9.75511	0	22.0941	38.6162	44.26	77.6041	87.1003	76.6994
SP_1850	type II restriction endonuclease DpnI	62.0266	114.412	12.546	11.7826	10.7637	17.9275	25.9742	28.4883	58.5753	57.5748	45.9253
SP_1851	conserved hypothetical protein	39.0538	0	126.389	155.793	81.3259	559.349	303.414	352.672	101.51	195.619	117.032
SP_1852	galactose-1-phosphate uridylyltransferase	78.2657	21.6549	34.5395	48.6571	83.3426	669.098	318.278	373.093	53.758	71.2781	92.6996
SP_1853	galactokinase	102.852	37.1183	113.967	99.3879	66.3489	264.227	154.135	175.159	54.0333	74.1832	95.1749
SP_1854	galactose operon repressor	7.84562	37.6265	19.043	44.7109	49.0134	72.9417	58.5798	80.1234	54.3637	94.0309	55.6026
SP_1855	alcohol dehydrogenase, zinc-containing	186.662	95.5636	67.8062	121.572	237.984	179.761	213.49	293.879	66.4876	116.012	74.223
SP_1856	transcriptional regulator, MerR family	223.401	0	0	178.237	174.454	69.5071	121.946	163.895	34.8261	60.0127	30.6406
SP_1857	cation efflux system protein	20.5032	35.6584	21.3281	90.1372	150.961	61.3519	62.9277	81.6853	19.0098	65.7744	30.6402
SP_1858	transcriptional regulator, TetR family	0	0	0	67.1413	0	11.9767	18.0032	15.6237	56.903	78.003	52.1749
SP_1859	conserved domain protein	16.2724	7.20371	0	66.7683	81.3259	33.8769	25.9363	53.2942	19.9262	53.9404	20.5674
SP_1860	choline transporter	176.782	107.416	46.2741	165.933	184.066	1637.09	1557.01	1862.71	1481.67	1364.37	2166.38
SP_1861	choline transporter	151.876	124.064	0	185.467	220.258	882.343	1056.06	1121.58	887.902	969.916	1300.5
SP_1862	hypothetical protein	89.594	225.01	234.191	82.4785	145.31	486.884	650.179	782.176	529.134	694.743	667.801
SP_1863	transcriptional regulator, MarR family	189.991	394.257	100.876	111.656	92.728	217.154	406.389	418.634	354.281	576.031	478.539
SP_1864	conserved hypothetical protein	2201.21	2190.58	1669.63	1638.86	804.017	1842.06	1584.39	1639	1438.66	1484.04	1427.49
SP_1865	glutamyl-aminopeptidase	849.007	619.113	778.027	1307.62	835.022	1698.45	1504.43	1422.47	1557.7	1504.11	1388.59
SP_1866	hypothetical protein	0	0	0	0	33.4726	17.3992	13.0441	17.4397	28.4329	51.869	33.3648
SP_1867	NAD-dependent epimerase/dehydratase family protein	11.2655	0	0	38.5202	0	13.3275	14.9242	19.0935	26.6475	46.0553	32.4095
SP_1868	conserved domain protein	94.9957	0	0	162.409	74.1824	23.4188	25.573	33.3901	44.5401	89.0414	66.6121
SP_1869	iron-compound ABC transporter, permerase protein	433.948	377.031	42.6563	78.5811	92.8992	31.7064	33.0661	35.0973	61.4422	142.026	163.916
SP_1870	iron-compound ABC transporter, permease protein	282.344	228.644	127.033	160.118	176.387	59.0207	55.3251	55.2409	90.5053	199.723	250.481
SP_1871	iron-compound ABC transporter, ATP-binding protein	462.11	433.944	178.443	215.467	306.187	44.0152	53.4682	57.9184	86.707	218.083	287.385
SP_1872	iron-compound ABC transporter, iron-compound-binding protein	607.183	584.406	102.667	237.94	294.08	46.7442	55.7608	57.8404	106.891	180.309	412.146
SP_1873	conserved hypothetical protein	1019.74	1056.54	2330.3	816.057	728.545	1413.96	1104.04	1030.16	708.831	922.841	767.822
SP_1874	ribosomal large subunit pseudouridine synthase B	803.965	548.797	641.614	897.632	825.703	1335.79	1149.92	1148.2	664.48	854.083	729.508
SP_1875	conserved hypothetical protein	633.596	905.961	370.436	1099.04	1451.83	1885.06	1581.12	1762.72	810.574	1118.38	864.074
SP_1876	conserved hypothetical protein	811.812	584.301	421.297	1156.08	1716.88	2092.51	1759.73	1931.29	870.3	1194.89	904.316
SP_1877	integrase/recombinase, phage integrase family	956.976	444.909	354.03	577.802	883.431	1513.15	1241.56	1208.99	696.707	933.32	725.515
SP_1878	CBS domain protein	1255.3	991.445	934.838	1180.37	1185.23	2180.21	1578.25	1537.4	1067.78	1291.37	1060.68
SP_1879	conserved hypothetical protein	676.708	673.485	569.976	1036.06	1119.98	1935.99	1342.93	1313	856.503	1015.08	889.054
SP_1880	HAM1 protein	572.692	694.298	620.745	650.243	976.366	1524.38	1210.57	1148.65	728.036	947.647	770.882
SP_1881	glutamate racemase	620.071	638.548	482.901	748.309	548.95	791.544	750.924	744.055	458.562	711.825	488.498
SP_1882	conserved hypothetical protein	3059.6	1903.99	2621.05	488.696	1041.68	1072.28	950.277	967.101	808.608	1308.35	976.511
SP_1883	dextran glucosidase DexS, putative	0	7.17713	0	16.6305	10.1282	1460.52	1173.32	1244.46	955.495	930.528	1421.24
SP_1884	PTS system, IIABC components	0	0	0	4.58014	4.18407	1833.72	1558.73	1297.8	2247.3	2146.09	3739.74
SP_1885	trehalose operon transcriptional repressor	37.0764	0	44.9961	38.0326	34.7437	37.1599	39.7505	46.4332	97.367	151.127	99.4316
SP_1887	oligopeptide ABC transporter, ATP-binding protein AmiF	2944.67	3361.26	2398.55	3481.03	3202.21	1227.79	1191.87	1321.07	1860.71	1831.76	1610.29
SP_1888	oligopeptide ABC transporter, ATP-binding protein AmiE	2452.24	2681.21	2312.55	2840	3446.36	1025.09	898.527	1075.55	1660.03	1529.68	1303.45
SP_1889	oligopeptide ABC transporter, permease protein AmiD	2058.85	2132.26	1477.09	2100.28	2331.7	757.967	618.848	763.787	1228.57	1167.65	1036.69
SP_1890	oligopeptide ABC transporer, permease protein AmiC	1584.85	1733.55	1160.44	1448.1	1614.4	468.636	448.006	518.693	948.562	921.103	835.838
SP_1891	oligopeptide ABC transporter, oligopeptide-binding protein AmiA	2588.2	1890.48	1724.03	1600.16	1422.28	345.161	427.487	460.442	1273.77	1395.24	1122.1
SP_1892	hypothetical protein	0	0	0	0	147.04	7.06963	3.91802	7.78191	11.5317	26.1471	10.2417
SP_1893	hypothetical protein	702.085	537.563	589.471	158.533	213.787	135.77	120.202	154.982	208.003	387.684	205.377
SP_1894	sucrose phosphorylase	131.532	99.0697	17.7365	124.93	102.714	53.298	33.6602	41.4034	38.6642	57.3224	42.7564
SP_1895	sugar ABC transporter, permease protein	72.4385	69.7133	152.89	69.999	93.4592	65.7958	42.4663	44.4931	34.9596	58.4638	35.6271
SP_1896	sugar ABC transporter, permease protein	88.7586	22.9209	86.1743	50.582	110.899	85.7266	47.6802	49.5034	26.699	46.3663	28.5749
SP_1897	sugar ABC transporter, sugar-binding protein	29.2903	20.8393	76.172	118.037	163.378	106.614	63.0801	64.3304	30.7113	50.9972	30.2176
SP_1898	alpha-galactosidase	77.9992	52.6041	70.9952	118.766	175.116	78.4018	53.8632	50.6832	50.5702	58.2899	46.6748
SP_1899	msm operon regulatory protein	162.27	71.1586	26.0099	172.737	19.1272	96.6388	98.2849	93.3313	218.405	248.746	200.715
SP_1900	BirA bifunctional protein	22.531	168.317	6.83594	91.4854	35.1891	106.684	101.617	100.512	179.292	207.626	213.001
SP_1901	RNA methyltransferase, TrmA family	64.3449	17.8032	34.1641	61.8791	50.2471	35.2038	69.3184	73.0006	216.499	243.251	204.926
SP_1902	conserved hypothetical protein	23.7489	52.5676	24.7044	46.4027	0	24.7455	29.844	30.1883	46.402	64.5937	52.8617
SP_1903	conserved hypothetical protein	1066.3	1174.65	5679.52	2751.38	3315.29	1182.07	1263.68	1049.49	763.589	1420.71	859.147
SP_1904	hypothetical protein	89.1445	0	0	87.0891	0	9.20192	6.16094	10.6693	13.1878	26.0208	17.6913
SP_1906	chaperonin, 60 kDa	453.973	325.365	666.258	705.325	829.513	5228.06	4794.49	4005.42	1315.41	1746.69	1848.89
SP_1907	chaperonin, 10 kDa	499.477	501.606	864.351	569.288	808.979	2323.42	2873.1	2315.93	1028.91	1552.59	1403.57
SP_1908	single-strand DNA-binding protein, authentic point mutation	2902.41	154.716	840.2	0	0	6.47948	5.67915	6.66693	6.83007	14.7242	5.57798
SP_1909	oxidoreductase, short chain dehydrogenase/reductase family	17.2974	256.526	369.464	283.897	172.898	156.763	185.414	210.631	293.815	288.476	283.044
SP_1910	conserved hypothetical protein	248.057	65.1436	61.2291	373.775	288.921	103.273	173.939	181.465	260.87	265.787	229.584
SP_1911	thioredoxin, putative	174.084	330.283	402.418	368.485	556.718	153.096	243.644	240.126	372.931	394.22	282.49
SP_1912	hypothetical protein	369.058	408.45	874.454	375.572	247.027	93.8206	183.069	148.887	297.224	310.54	237.435
SP_1914	hypothetical protein	105.445	0	85.3126	180.274	140.287	166.61	184.161	208.313	153.216	235.827	114.138
SP_1915	hypothetical protein	175.742	0	391.016	280.427	192.132	181.79	174.369	224.606	203.014	397.058	124.602
SP_1916	PAP2 family protein	78.4562	0	0	80.4796	49.0134	22.4983	24.6781	27.0478	34.2956	71.3338	32.6627
SP_1917	hypothetical protein	0	0	0	12.4156	56.7097	13.1493	22.0996	22.1338	27.2394	72.4267	29.3365
SP_1918	ABC transporter, ATP-binding protein	2.55439	0	0	0	0	2.26917	2.68415	2.47215	2.13324	4.48453	0.980073
SP_1919	ABC transporter, permease protein	0	0	0	0	0	1.43126	1.70162	2.39341	1.63755	4.73955	1.06074
SP_1920	transcriptional regulator, MarR family	0	0	0	0	0	1.76785	2.65119	2.00264	1.64938	3.57343	0.95589
SP_1921	hypothetical protein	0	0	0	0	0	22.2927	17.9984	10.4451	45.8647	30.5049	13.4422
SP_1922	conserved hypothetical protein	672.82	496.423	1218.11	898.858	671.832	710.724	1060.52	786.512	1388.63	1639.68	663.913
SP_1923	pneumolysin	169.412	181.314	1220.04	2001.99	1825.96	1627.26	2322.77	1509.44	2086.73	2088.61	568.723
SP_1924	hypothetical protein	230.902	333.632	1113.11	1962.84	1983.43	1308.82	2272.8	1341.67	1538.5	1885.77	537.328
SP_1925	hypothetical protein	138.516	325.764	1029.63	1591.09	1838.85	905.28	1557.19	921.073	1206.94	1560.37	441.528
SP_1926	hypothetical protein	138.162	122.327	744.473	1351.11	1596.79	755.6	1391.69	831.127	1373.81	1702.05	502.61
SP_1927	IS1381, transposase OrfA	87.871	130.914	82.0313	300.457	358.929	143.506	142.088	123.218	158.638	158.022	167.112
SP_1928	IS1381, transposase OrfB	70.9727	48.625	16.4063	11.556	63.3404	11.0323	18.6709	15.8823	43.3205	69.6585	40.3918
SP_1929	hypothetical protein	0	0	0	0	0	7.69615	12.6049	12.5646	30.8783	71.3102	18.6716
SP_1930	hypothetical protein	0	0	24.5151	34.5353	94.6465	16.2704	12.4521	13.0819	19.1834	28.6015	17.7726
SP_1931	hypothetical protein, fusion	4.74978	31.5406	23.0575	16.2409	0	13.9503	15.8133	15.2314	18.5867	30.1987	16.6321
SP_1932	hypothetical protein	0	0	0	45.5238	0	27.2761	33.7979	32.0526	36.4694	64.4433	37.3431
SP_1933	hypothetical protein	0	0	0	34.014	0	11.1906	10.6255	11.192	13.2605	22.6608	13.5414
SP_1934	hypothetical protein	30.9405	0	0	84.6359	38.6584	15.8339	18.5416	21.5718	14.6176	24.7661	15.3099
SP_1935	hypothetical protein	0	0	0	0	0	9.71073	10.0562	11.3883	9.33019	14.3809	8.68698
SP_1936	type II restriction-modification system regulatory protein, putative	0	0	0	0	203.315	8.50727	8.04161	11.831	7.45484	11.2981	7.6787
SP_1937	autolysin	1557.71	1187.43	1313.79	1361.01	1505.74	1297.06	1281.59	1255.97	1527.84	1851.26	1531.12
SP_1938	MATE efflux family protein DinF	1873.04	1804.24	0	1779.02	1733.53	556.696	458.064	563.16	926.178	1022.37	790.649
SP_1939	recA protein	1188.28	700.115	392.027	568.699	573.575	518.072	518.266	522.887	670.779	919.324	643.755
SP_1940	competence/damage-inducible protein CinA	1199.47	890.001	271.399	548.392	352.796	565.659	541.261	620.382	862.848	947.478	705.192
SP_1941	transcriptional regulator, putative	627.051	83.5561	117.076	215.125	163.768	96.2962	146.851	157.857	161.739	161.812	146.158
SP_1942	acetyltransferase, GNAT family	325.304	545.059	364.906	257.028	210.512	143.733	205.871	257.114	395.053	398.415	381.419
SP_1943	conserved hypothetical protein TIGR00150	581.574	219.234	110.956	130.256	222.118	115.523	201.468	231.772	156.511	225.5	151.112
SP_1944	hypothetical protein	771.84	578.244	0	182.711	148.365	57.9666	116.592	122.754	102.68	139.569	84.8099
SP_1945	transcriptional regulator PlcR, putative	271.678	70.4711	82.4276	14.5148	53.0386	7.10893	5.63097	7.35816	12.4382	14.9261	8.44314
SP_1946	putative transcriptional regulator PlcR	506.479	202.604	111.084	83.4604	142.956	26.3777	28.68	30.307	71.68	95.4035	63.9413
SP_1947	hypothetical protein	6944.89	1765.86	598.685	1502.29	1781.68	113.685	78.1083	79.2002	219.967	151.378	116.257
SP_1948	conserved domain protein	15933.9	10989.3	9697.2	8132.38	25343.2	694.84	525.424	428.284	318.694	288.838	208.126
SP_1949	hypothetical protein	19436.2	13198.2	7566.41	4125.33	12939.5	413.329	337.603	235.321	167.8	133.502	113.796
SP_1950	bacteriocin formation protein, putative	1321.59	527.706	88.7781	224.514	278.054	16.9101	14.8593	15.9053	22.4178	20.2812	14.3193
SP_1951	conserved hypothetical protein	1344.24	670.405	90.7581	294.065	414.632	17.5461	15.5804	19.2823	19.682	24.4225	14.2806
SP_1952	hypothetical protein	814.933	486.25	17.2001	92.0756	283.329	6.60233	4.83644	5.03618	5.93832	7.92847	7.02542
SP_1953	toxin secretion ABC transporter, ATP-binding/permease protein	741.686	578.77	70.1784	148.294	371.071	11.5199	9.40362	9.69666	9.97644	12.3753	7.61741
SP_1954	serine protease, subtilase family, authentic frameshift	925.65	519.498	91.1459	227.911	346.026	17.4614	16.9362	18.768	15.9043	21.454	10.7728
SP_1955	hypothetical protein	1427.9	537.681	0	130.006	475.053	19.7159	19.9543	20.6665	37.6595	39.2206	41.696
SP_1956	hypothetical protein	1630.42	744.571	58.3192	375.572	444.95	71.0068	71.1008	66.6208	79.9357	106.257	77.0959
SP_1957	ABC transporter, ATP-binding protein	1461.74	580.735	495.298	412.951	539.844	87.7789	75.866	75.3348	106.483	122.123	94.5667
SP_1958	hypothetical protein	1497.06	378.195	78.9931	612.043	686.187	44.7496	25.9025	27.031	55.9113	42.4486	51.0239
SP_1959	nucleoside diphosphate kinase	216.494	281.884	510.021	195.95	258.563	149.748	226.1	239.661	231.637	272.428	187.415
SP_1960	DNA-directed RNA polymerase, beta subunit	1432.74	1632.47	1084.67	1885.82	1885.06	1248.35	1372.53	1367.79	1462.18	1507.32	1267.56
SP_1961	DNA-directed RNA polymerase, beta subunit	1150.57	1333.15	1043.38	1241.51	1513.72	631.098	705.741	709.554	865.557	1082.87	776.993
SP_1962	hypothetical protein	24.4086	162.083	0	0	0	3.00867	5.84075	5.28867	4.19335	18.1577	6.35107
SP_1963	CBS domain protein	395.815	291.312	220.967	189.478	185.456	94.5249	118.486	135.361	212.132	354.389	189.441
SP_1964	DNA-entry nuclease	198.109	261.691	286.961	267.68	334.36	223.442	244.325	271.272	297.087	421.38	273.07
SP_1965	hypothetical protein	744.993	1233.24	293.648	740.257	735.911	561.913	622.785	718.708	725.084	903.905	623.744
SP_1966	UDP-N-acetylglucosamine 1-carboxyvinyltransferase	501.973	508.972	343.842	684.453	715.046	462.045	494.578	589.03	552.13	614.721	399.574
SP_1967	conserved hypothetical protein	148.568	193.938	6.1642	329.982	353.01	212.576	254.141	281.737	241.02	296.107	208.131
SP_1968	phosphopantetheine adenylyltransferase	97.0355	107.393	0	368.659	117.873	113.376	164.865	199.711	141.905	234.602	114.926
SP_1969	type II DNA modification methyltransferase, putative	53.6989	5.40278	154.037	250.381	76.243	73.2247	106.149	132.522	113.197	190.002	86.2669
SP_1970	aspartate--ammonia ligase	846.853	1407.33	1166.28	1175.51	1160.92	610.605	771.536	762.758	1263.08	1318.99	857.023
SP_1971	hypothetical protein	319.531	97.2501	58.1677	218.514	124.761	77.9575	94.2462	83.8495	158.966	208.939	156.982
SP_1972	membrane protein	990.41	531.579	506.092	458.325	343.094	623.902	940.856	835.79	1596.39	2136.36	1462.59
SP_1973	SpoU rRNA Methylase family protein	163.646	196.862	164.063	182.464	150.017	124.794	140.554	161.153	276.71	453.057	250.525
SP_1974	acylphosphatase	0	0	45.867	32.3072	0	30.2406	30.1786	25.2492	86.6174	82.0962	73.0877
SP_1975	spoIIIJ family protein	204.748	69.2395	82.8278	106.959	124.358	98.0018	133.773	120.999	390.633	475.188	334.574
SP_1976	pyruvate formate-lyase-activating enzyme	513.962	932.133	788.739	685.95	828.604	756.549	759.773	691.32	1259.71	1417.94	1744.29
SP_1977	hypothetical protein	175.742	27.7857	121.875	257.535	313.686	237.646	198.905	270.055	443.896	410.882	392.616
SP_1978	diaminopimelate decarboxylase	572.11	251.871	181.571	313.427	315.942	179.839	188.749	212.48	292.669	326.19	264.519
SP_1979	pur operon repressor	620.828	421.065	819.124	446.331	348.066	472.153	409.636	417.269	736.555	718.018	645.731
SP_1980	cmp-binding-factor 1	233.185	251.78	103.535	291.706	293.129	435.907	470.593	521.624	508.82	518.414	465.141
SP_1981	competence-induced protein Ccs50	283.117	246.026	152.707	340.614	435.623	722.475	723.607	758.459	622.827	661.217	610.058
SP_1982	conserved hypothetical protein	427.793	473.454	224.507	401.928	294.94	668.612	665.866	692.371	566.175	582.002	554.447
SP_1983	ribulose-phosphate 3-epimerase	337.039	226.473	43.825	329.268	169.197	494.916	513.395	506.534	455.083	480.398	461.011
SP_1984	conserved hypothetical protein TIGR00157	146.951	235.657	109.188	251.236	140.516	461.228	406.915	402.474	409.717	435.056	380.024
SP_1985	dimethyladenosine transferase	175.742	130.246	125.684	219.978	107.829	246.13	266.686	217.772	336.965	381.451	323.056
SP_1986	hypothetical protein	100.424	64.8334	264.063	343.38	535.88	360.329	349.661	390.052	314.461	344.768	302.932
SP_1987	ABC transporter, ATP-binding protein	119.078	68.1659	219.261	287.821	339.887	265.789	290.965	326.059	256.97	291.792	229.508
SP_1988	immunity protein, putative	125.715	111.881	185.599	239.302	192.294	180.889	205.858	205.213	174.55	196.714	175.534
SP_1989	transcriptional regulator PlcR, putative	61.5097	58.35	17.7735	75.1143	96.0662	92.3267	100.41	119.256	128.288	122.702	102.745
SP_1990	primase-related protein	112.776	0	125.46	208.874	139.439	180.114	196.578	207.52	230.432	214.07	161.951
SP_1991	hydrolase, putative	129.422	90.4652	49.6003	163.039	154.259	150.047	170.917	165.433	208.692	204.059	169.324
SP_1992	cell wall surface anchor family protein	110.828	78.8514	14.4109	54.1364	160.729	18.6408	21.5991	24.0516	42.3868	68.4299	37.1114
SP_1993	ribosomal protein L34	25570.5	21351.8	7512.25	767.835	792.928	572.601	942.646	774.074	2097.23	3721.12	3114.48
SP_1994	aminotransferase, class I	307.006	389	476.592	471.087	426.961	347.355	427.791	435.066	817.402	1043.74	915.731
SP_1995	conserved hypothetical protein	57.7255	99.3796	202.384	54.828	0	33.3142	32.8313	46.8492	97.9162	128.254	51.2832
SP_1996	universal stress protein family	529.554	302.699	310.741	696.424	690.732	1021.43	952.407	393.842	1157.42	1126.06	863.997
SP_1997	Cof family protein	307.454	310.864	340.882	389.362	331.978	343.53	352.522	375.713	454.566	807.133	294.777
SP_1998	L-asparaginase, putative	459.886	151.48	212.617	271.441	393.329	270.716	280.028	255.623	446.363	818.474	264.083
SP_1999	catabolite control protein A	1546.22	934.986	547.444	1529.03	1258.35	1053.3	752.279	603.957	1902.19	1963.84	1037.52
SP_2000	DNA-binding response regulator	65.9032	252.85	346.582	262.9	288.199	234.794	284.478	402.447	7165.65	9017.06	644.354
SP_2001	sensor histidine kinase, putative	67.2237	47.8279	174.821	168.289	194.982	181.755	240.603	330.314	5477.04	7412.21	500.762
SP_2002	conserved hypothetical protein	50.0079	37.5559	26.0099	30.5343	50.2088	103.241	175.78	238.481	5152	7036.36	406.521
SP_2003	ABC transporter, ATP-binding protein	53.6162	64.2839	0	10.185	37.2169	95.5627	144.708	193.375	4801.03	6769.28	325.112
SP_2004	hypothetical protein	270.372	359.077	0	92.4484	0	65.1596	133.333	189.416	7329.65	10440.9	402.368
SP_2005	hypothetical protein	229.663	198.921	0	136.571	0	66.9735	141.494	232.99	7377.53	13083.7	521.483
SP_2006	transcriptional regulator ComX1	87.871	151.953	39.9903	0	0	4.9254	7.91358	13.3539	12.2393	31.894	8.33175
SP_2007	transcription antitermination protein NusG	760.894	594.91	929.383	318.921	291.342	220.63	226.457	295.906	612.955	726.007	423.093
SP_2008	preprotein translocase, SecE subunit, putative	1995.71	1879.07	198.822	534.712	814.121	262.519	312.999	408.393	750.68	1009.47	524.076
SP_2009	ribosomal protein L33	2179.55	1658.97	313.649	854.241	457.458	350.055	529.163	714.78	856.018	1692.98	766.612
SP_2010	penicillin-binding protein 2A	75.6267	94.3272	99.0652	121.086	58.1197	64.1668	94.6301	96.9532	178.148	240.14	185.164
SP_2011	ribosomal large subunit pseudouridine synthase, RluD subfamily	18.0557	76.6011	80.3458	41.1585	46.9991	30.621	42.4385	51.771	110.348	186.268	111.984
SP_2012	glyceraldehyde 3-phosphate dehydrogenase	11896.6	12578.8	18541.5	14218.1	12927.3	16315.9	14092.1	10220.8	17271	16008.4	14547.4
SP_2013	conserved hypothetical protein	126.298	141.265	104.358	147.013	159.481	50.6781	60.8491	75.9887	94.4336	242.453	88.917
SP_2014	IS630-Spn1, transposase Orf2	291.607	395.885	754.979	1635.23	850.144	243.958	291.858	384.566	629.484	1274.38	613.727
SP_2015	IS630-Spn1, transposase Orf1	512.054	153.921	291.536	778.163	947.827	211.546	294.782	380.967	566.494	1270.52	626.728
SP_2016	nicotinate-nucleotide pyrophosphorylase	178.158	0	51.3048	294.262	400.865	42.6369	43.6682	65.1943	93.1326	244.698	61.511
SP_2017	membrane protein	56.3018	0	14.6417	85.9432	113.056	17.8967	18.0435	21.1644	65.0209	121.76	52.1427
SP_2020	transcriptional regulator, GntR family	79.554	52.0268	0	123.645	33.8858	34.275	53.5731	50.9454	157.691	175.605	170.223
SP_2021	glycosyl hydrolase, family 1	78.523	26.899	13.6137	83.1052	87.5984	163.469	80.557	118.079	101.889	125.293	100.096
SP_2022	PTS system, IIC component	58.9875	13.507	44.4336	45.2077	15.884	158.716	101.875	132.266	90.3025	130.059	112.902
SP_2023	PTS system, IIB component	119.436	42.4879	51.7673	218.78	53.2961	277.434	163.137	247.489	146.808	212.011	188.532
SP_2024	PTS system, IIA component	24.1847	80.2982	97.8355	165.389	25.1812	374.449	203.935	295.157	163.271	247.158	220.568
SP_2025	hypothetical protein	0	0	0	140.839	0	17.0405	9.42773	10.4451	5.24168	12.9374	10.4147
SP_2026	alcohol dehydrogenase, iron-containing	3647.04	2023.11	2914.52	11783.8	9758.76	3101.31	3433.12	1764.12	1616.77	2365.54	2186.02
SP_2027	conserved hypothetical protein	769.673	837.628	770.616	405.727	370.641	195.987	269.724	291.688	773.473	861.326	546.888
SP_2028	phosphotyrosine protein phosphatase	823.406	605.263	581.677	619.824	508.642	213.829	289.285	328.475	866.908	956.227	631.31
SP_2029	preprotein translocase, YajC subunit	1032.48	884.976	1194.38	495.755	397.989	171.581	400.284	432.867	1090.1	1992.58	1123
SP_2030	transketolase	417.354	401.396	511.358	699.851	503.968	372.532	504.963	403.596	887.138	874.188	857.973
SP_2031	conserved hypothetical protein	26.5544	0	0	8.25432	0	4.1248	6.09051	3.78925	7.52268	7.69806	5.19536
SP_2032	transcriptional regulator, BglG family	15.7475	0	0	10.7691	0	0.896911	0.720878	1.0312	3.14877	5.2794	2.44459
SP_2033	L-ribulose 5-phosphate 4-epimerase AraD, putative	9.63498	34.1228	0	0	0	2.14593	2.90701	2.93197	3.12662	6.97637	3.22936
SP_2034	hexulose-6-phosphate isomerase, putative	42.7151	67.5348	0	0	0	2.15275	2.41248	2.58557	2.28596	4.87231	1.85688
SP_2035	hexulose-6-phosphate synthase, putative	0	0	0	0	0	3.09559	2.49141	3.06838	2.19112	5.47675	2.07726
SP_2036	PTS system, IIA component	27.1207	0	0	0	0	2.3516	2.90627	2.74228	3.15795	7.45138	2.10506
SP_2037	PTS system, IIB component	0	0	0	0	0	4.64875	5.25181	4.41098	6.86995	12.0536	3.46297
SP_2038	PTS system, membrane component, putative	0	2.00103	0	0	5.64763	2.53604	2.66173	2.56816	4.97852	7.22721	2.71904
SP_2039	conserved hypothetical protein	50.6948	60.7813	0	115.56	26.3918	18.6745	22.3057	29.1691	26.1278	53.1531	24.4438
SP_2040	jag protein, putative	534.17	567.538	346.825	388.129	417.135	166.969	197.929	252.056	424.93	529.962	389.184
SP_2041	SpoIIIJ family protein	292.371	335.955	349.006	371.474	299.427	109.439	123.168	157.683	258.524	352.843	215.195
SP_2042	ribonuclease P protein component	729.896	1203.86	103.201	266.535	343.094	76.1738	121.464	153.815	269.828	427.983	175.448
SP_2043		129.809	552.557	654.386	34.1429	0	22.7489	26.4911	25.7703	139.238	109.738	120.749
SP_2044	acetate kinase	661.799	624.654	343.829	435.171	352.6	158.474	220.008	201.806	773.572	763.534	760.17
SP_2045	conserved hypothetical protein	163.031	64.2217	147.553	85.0351	129.469	54.203	61.1482	67.0032	97.7392	149.633	77.9799
SP_2047	conserved domain protein	1782.89	7.04711	85.0035	0	0	5.54822	7.35338	8.33924	13.3093	18.9787	13.9284
SP_2048	conserved hypothetical protein	958.593	6.31494	117.72	0	0	6.20866	6.97526	8.32451	10.0477	15.9316	12.7077
SP_2049	conserved hypothetical protein	1040.31	11.1782	147.091	0	0	8.11374	7.30313	8.0242	12.4354	16.4797	11.8929
SP_2050	competence protein CglD	576.043	14.4074	94.7918	66.7683	0	4.81387	6.39943	6.33074	8.47988	12.5248	8.72645
SP_2051	competence protein CglC	1060.09	0	0	68.9122	0	4.66006	6.50008	5.97766	7.61727	14.4728	7.85712
SP_2052	competence protein CglB	785.102	6.68385	10.9939	5.1625	0	6.22483	6.48739	6.36822	6.90245	13.5827	7.53739
SP_2053	competence protein CglA	1150.16	92.9141	57.7354	0	0	4.13931	4.22164	6.00955	4.67411	11.5885	5.7388
SP_2054	conserved hypothetical protein	191.332	196.069	68.8005	0	22.1351	68.704	133.113	153.576	252.007	369.292	297.83
SP_2055	alcohol dehydrogenase, zinc-containing	472.96	460.078	519.609	2553.46	1508.45	4476.17	4077.17	2816.7	2360.68	2887.31	3873.2
SP_2056	N-acetylglucosamine-6-phosphate deacetylase	196.794	248.19	294.373	571.182	593.266	482.901	761.301	448.347	628.281	700.467	612.922
SP_2057	conserved hypothetical protein	216.052	107.521	193.572	312.357	303.462	265.893	324.467	329.727	682.298	668.188	569.768
SP_2058	queuine tRNA-ribosyltransferase	159.136	247.592	128.753	86.7462	129.673	231.328	210.183	241.086	639.436	834.499	799.071
SP_2059	conserved hypothetical protein	104.462	204.021	104.404	168.088	191.941	130.97	131.393	132.727	180.006	298.162	185.862
SP_2060	pyrrolidone-carboxylate peptidase	134.872	144.744	138.881	27.9495	153.195	86.3717	101.051	92.8445	110.334	164.544	138.319
SP_2061	conserved hypothetical protein	80.5484	0	0	75.1143	22.8729	10.769	13.1798	17.3469	30.262	54.5457	38.9461
SP_2062	transcriptional regulator, MarR family	49.5048	157.518	0	31.7384	57.9877	11.1784	13.0693	15.4936	30.5346	53.7979	31.5749
SP_2063	LysM domain protein, authentic frameshift	577.912	757.554	839.329	218.662	196.054	240.09	275.888	275.958	858.811	1872.4	2521.86
SP_2064	hydrolase, haloacid dehalogenase-like family	199.514	126.848	10.3035	21.7723	106.077	19.5766	25.0192	37.2609	73.657	94.5252	47.1393
SP_2065	MATE efflux family protein	264.466	74.3538	20.7069	61.9875	43.3031	26.4434	33.506	43.439	58.4117	92.6148	39.1944
SP_2066	threonine synthase	402.964	512.773	323.154	185.13	282.792	80.2588	101.532	116.688	187.964	249.929	165.132
SP_2067	hypothetical protein	272.276	278.51	95.1255	123.427	61.2092	28.152	39.6584	46.878	73.2359	120.976	53.4163
SP_2068	cytidine/deoxycytidylate deaminase family protein	463.595	922.199	102.963	103.606	132.505	184.761	251.879	276.849	718.566	787.748	618.567
SP_2069	glutamyl-tRNA synthetase	331.997	459.292	192.698	175.832	160.627	165.969	215.251	205.283	600.277	597.508	507.417
SP_2070	glucose-6-phosphate isomerase	771.312	708.845	1061.67	1074.97	600.795	1879.5	1785.31	1530.34	2336.89	2624.76	2100.87
SP_2071	conserved domain protein	812.807	624.021	355.469	200.305	68.6187	117.587	329.037	249.837	434.081	911.443	643.934
SP_2072	glutamine amidotransferase, class-I	36.1609	8.00412	0	12.3645	0	9.56011	10.8914	14.3295	156.655	108.067	25.5638
SP_2073	ABC transporter, ATP-binding/permease protein	335.67	313.71	606.53	563.676	559.202	404.364	353.234	496.945	810.939	880.891	738.485
SP_2075	ABC transporter, ATP-binding/permease protein	177.297	232.367	135.896	300.457	425.072	150.837	192.468	232.08	263.832	459.294	194.152
SP_2077	transcriptional repressor, putative	159.229	143.591	959.051	100.825	147.369	59.3573	78.1062	82.7163	281.742	377.933	233.866
SP_2078	arginyl-tRNA synthetase	412.869	504.355	389.503	364.917	340.66	193.413	278.516	250.218	535.388	759.71	530.46
SP_2079	IS1381, transposase OrfB	202.779	359.077	205.078	265.789	401.156	223.002	294.972	286.467	507.556	700.339	426.186
SP_2081	conserved hypothetical protein	576.297	764.108	27.6989	526.776	472.311	411.445	465.651	532.686	754.421	1160.32	609.544
SP_2082	response regulator	888.018	696.409	230.452	674.756	604.775	383.08	491.869	558.341	1125.17	1630.46	984.062
SP_2083	sensor histidine kinase PnpS	685.75	703.092	600.455	504.146	442.004	394.141	447.198	551.499	979.817	1525.52	795.862
SP_2084	phosphate ABC transporter, phosphate-binding protein	54.167	0	58.4333	20.5793	46.9991	361.671	505.755	664.808	3746.11	1667.2	2322.78
SP_2085	phosphate ABC transporter, permease protein	0	13.507	0	0	9.53038	190.389	237.709	321.037	845.44	452.414	712.208
SP_2086	phosphate ABC transporter, permease protein	9.69165	0	0	55.2311	0	304.82	322.963	488.705	821.819	462.749	822.147
SP_2087	phosphate ABC transporter, ATP-binding protein	38.5092	0	0	59.8521	10.9353	461.848	573.964	862.404	948.932	758.161	1152.24
SP_2088	phosphate transport system regulatory protein PhoU	0	0	0	13.846	37.9458	412.336	473.174	705.65	751.266	643.535	1063.94
SP_2090	transcriptional regulator	0	0	0	0	0	4.80201	6.00141	8.46188	4.50713	10.524	6.24782
SP_2091	glycerol-3-phosphate dehydrogenase (NAD(P)+)	557.294	651.202	226.494	398.837	348.154	213.583	349.879	292.871	510.735	660.297	525.945
SP_2092	UTP-glucose-1-phosphate uridylyltransferase	742.51	405.209	330.586	736.12	695.336	393.683	524.723	453.641	625.493	670.483	590.65
SP_2093	hypothetical protein	840.623	538.94	234.412	804.63	909.251	278.591	407.189	385.723	393.954	426.448	390.714
SP_2094	conserved hypothetical protein	186.629	322.733	212.338	245.95	182.174	181.126	223.252	225.213	213.638	265.501	172.568
SP_2095	5-formyltetrahydrofolate cyclo-ligase family protein	209.914	67.5348	225.13	233.689	221.105	194.318	262.986	283.144	255.119	330.494	204.418
SP_2096	peptidase, M20/M25/M40 family	81.5778	113.501	152.748	195.257	207.494	202.16	225.944	248.256	245.094	306.032	179.217
SP_2097	2,3,4,5-tetrahydropyridine-2-carboxylate N-succinyltransferase, putative	333.759	189.909	302.072	335.274	276.831	208.657	262.961	269.2	376.951	668.939	321.045
SP_2098	membrane protein	332.407	254.322	168.38	187.786	194.119	137.503	127.718	140.971	183.928	279.06	173.417
SP_2099	penicillin-binding protein 1B	391.25	406.983	290.602	464.21	397.354	422.82	349.489	457.801	229.083	278.234	208.857
SP_2100	tyrosyl-tRNA synthetase	1113.59	747.363	921.335	523.47	458.55	243.633	271.643	274.264	773.207	741.998	685.111
SP_2101	cation-transporting ATPase, EI-E2 family	539.615	496.145	362.702	456.363	468.762	536.539	470.343	528.443	507.742	449.099	417.229
SP_2102	hypothetical protein	3223.34	1552.26	2030.28	1040.04	1002.89	1798.14	1615.9	1589.17	2056.88	2313.85	2000.55
SP_2103	rRNA (guanine-N1-)-methyltransferase	149.039	65.2916	75.3645	138.019	160.03	94.5338	89.6922	84.0058	135.165	204.634	126.678
SP_2104	hypothetical protein	140.084	42.2826	0	174.178	59.6685	8.82302	16.4292	15.3908	26.0717	37.5785	29.8786
SP_2105	hypothetical protein	115.014	0	251.248	235.961	186.815	102.25	186.79	151.251	577.233	551.598	533.869
SP_2106	glycogen phosphorylase family protein	675.661	927.944	317.231	546.649	495.732	1135.19	976.742	921.53	725.516	719.015	1116.71
SP_2107	4-alpha-glucanotransferase	866.554	1087.82	358.279	492.845	455.65	592.468	620.015	594.422	604.596	597.076	797.769
SP_2108	maltose/maltodextrin ABC transporter, maltose/maltodextrin-binding protein	2893.11	2378.5	855.138	4800.94	4958.67	2675.35	2418.15	1398.72	4745.72	4385.43	4018.76
SP_2109	maltodextrin ABC transporter, permease protein	917.002	1282.54	205.455	871.74	1063.91	633.622	532.639	354.817	552.897	556.455	532.969
SP_2110	maltodextrin ABC transporter, permease protein	647.306	1041.72	91.0811	614.815	776.539	1064.51	666.312	521.505	659.251	608.423	605.929
SP_2111	malA protein	134.933	240.393	103.845	337.592	416.338	420.421	287.683	242.289	149.421	266.628	160.321
SP_2112	maltose operon transcriptional repressor	248.389	254.21	123.172	278.539	467.191	446.212	331.753	290.752	187.643	337.581	202.089
SP_2113	conserved hypothetical protein	443.553	280.291	207.168	310.983	345.279	484.466	467.292	485.224	610.292	750.743	574.904
SP_2114	aspartyl-tRNA synthetase	357.91	406.862	344.587	452.219	354.764	381.341	411.687	411.301	609.476	668.477	514.727
SP_2115	hypothetical protein	935.769	1439.81	1772.73	351.184	249.523	162.638	308.811	301.111	520.901	944.068	520.791
SP_2116	conserved domain protein	127.29	0	49.8321	112.32	57.7167	105.502	89.7971	131.772	73.6579	92.4107	55.4846
SP_2117	hypothetical protein	23.2258	0	28.187	72.798	60.457	52.9302	52.597	73.1934	38.9593	57.7654	30.6092
SP_2118	hypothetical protein	137.708	0	0	0	61.4496	70.7401	80.5046	102.553	50.3202	70.3759	38.2318
SP_2119	transcriptional regulator, putative	73.2258	0	103.678	0	38.1215	55.5047	68.7558	89.2611	42.6324	55.3204	25.2966
SP_2120	hypothetical protein	28.1638	6.23398	116.211	0	43.9864	12.3539	22.0933	28.3419	20.5366	23.0184	13.762
[truncated: 108 more rows]
