# Supplementary material for: Streptococcus pneumoniae in the heart subvert the host response through biofilm-mediated resident macrophage killing
Source: PLoS Pathog. 2017 Aug 25;13(8):e1006582. doi: 10.1371/journal.ppat.1006582 (PMC5589263; doi:10.1371/journal.ppat.1006582)
Supplement: S3 Table — (XLSX) [file ppat.1006582.s017.xlsx]

## Sheet: Sheet1
Table S3: qRT-PCR primer sequences for validation of RNA-seq data.
Gene ID	TIGR4 Gene Annotation	Forward primer name	Forward primer sequence	Reverse primer name	Reverse primer sequence
SP_0013	cell division protein FtsH	SP_0013_F	TGTTGCTGGAGCTGAGGAAG	SP_0013_R	AACACCTGCTGGAATACGGG
SP_0041	bacteriocin BlpU	SP_0041_F	GCACGAGGTCTTCAGCTAGG	SP_0041_R	CACCAACATGTCGCTGCATAG
SP_0069	choline binding protein I	SP_0069_F	CGGCTCAGGAGCTATGAAGAC	SP_0069_R	GTTGTGCTCACAGCCAAAGC
SP_0071	immunoglobulin A1 protease	SP_0071_F	TTGGGAGCGGAGTTATACGC	SP_0071_R	CGAATCGAAACGTTCCACCG
SP_0082	cell wall surface anchor family protein	SP_0082_F	AGTTCTGTACGTGCCGATGG	SP_0082_R	AGTAACGCCCTCAGGTTTCG
SP_0117	surface protein A	SP_0117_F	GATGTGGCGCTTGTTGTTC	SP_0117_R	CCTGTTGCTCTTTCCTAGCC
SP_0208	30S ribosomal protein S10	SP_0208_F	GAACACCGTACGCTTGACAC	SP_0208_R	TGTGAGTCGCACGAATGATTG
SP_0230	preprotein translocase subunit SecY	SP_0230_F	TGTGAACGTCCCAAGTAGCC	SP_0230_R	GATGGAGCACCTTGTGCAAC
SP_0237	50S ribosomal protein L17	SP_0237_F	TGATTTGCATGCACGTCGTC	SP_0237_R	AACGAGGTGCGATTTCTGAG
SP_0335	cell division protein FtsL	SP_0335_F	GCTGTAACCACTCTTATTGTAGC	SP_0335_R	GCATCGTCCAATTCGGTCTTC
SP_0338	ATP-dependent Clp protease ATP-binding subunit (ClpL)	SP_0338_F	TGCTGTTGAACGAGAAATCG	SP_0338_R	AGCCACATCGTTGACACTTG
SP_0377	choline binding protein C	SP_0377_F	CACAGGTGGCCGATTTGTTG	SP_0377_R	TGCCAACCGACAACCATCTC
SP_0378	choline binding protein J	SP_0378_F	CTTGGTGGTGAAAGACGTGC	SP_0378_R	GGTACCTTCCTGATACCAGCC
SP_0390	choline binding protein G	SP_0390_F	TCCGGCTGTTAGTCCAAGTC	SP_0390_R	TTTGCACCAATGGGCTCTTC
SP_0391	choline binding protein F	SP_0391_F	GCCAAGCAGAGAAACGAGTC	SP_0391_R	GCGAATCAAAGCCACCATCC
SP_0462	cell wall surface anchor family protein	SP_0462_F	CAATACGGATGGCACAACTG	SP_0462_R	GAGGTTGGGCTTCTGTCAAG
SP_0463	cell wall surface anchor family protein	SP_0463_F	TCACGGGAATACTCCAAAGC	SP_0463_R	CAAATCGAACGTTGCTTCAG
SP_0464	cell wall surface anchor family protein	SP_0464_F	ACCTCTCTTCAAGGGGCAATG	SP_0464_R	ACCTTCCACTCGGAAACGAC
SP_0517	molecular chaperone DnaK	SP_0517_F	AGTTCCAGTTCGTCAAGCCC	SP_0517_R	AACAACGGCAGGGATACGAG
SP_0519	molecular chaperone DnaJ	SP_0519_F	TTCTTCGCGCAATCCAAACG	SP_0519_R	GTGACTGGACTTGTCCCTGG
SP_0648	beta-galactosidase	SP_0648_F	AGGCACCTGAAATGCCTACC	SP_0648_R	CTACTTCTCGTCCGTCAGCC
SP_0664	zinc metalloprotease ZmpB	SP_0664_F	GTTTGCTGACTGTTGGGAGC	SP_0664_R	GGTCGCAACTGGGTCTACAG
SP_0715	lactate oxidase	SP_0715_F	CGTGGTGTGCATGAGTTTGG	SP_0715_R	TCACACGGTCCATGATGTGG
SP_0730	pyruvate oxidase	SP_0730_F	TTCACAAACGCTGACTACGC	SP_0730_F	GTGGACGGTGTTGAGTGATG
SP_0798	DNA-binding response regulator CiaR	SP_0798_F	AGGGACATGGATTTGAACTGGG	SP_0798_R	CCTGAACGTTTGAGAAGGGC
SP_0799	sensor histidine kinase CiaH	SP_0799_F	AGCGAAAGCATTGCATCGAG	SP_0799_R	AGCTCCGGCTTAATCCCATC
SP_0820	ATP-dependent Clp protease ATP-binding subunit ClpE	SP_0820_F	TGGAGGTTACGGTGGAAACG	SP_0820_R	ATAATCTCATCGTCGCGCCC
SP_0930	choline binding protein E	SP_0930_F	AATCAACGCAGCCAGCAAAG	SP_0930_R	GCACTCTTATGCCAACCAGC
SP_0966	adherence and virulence protein A	SP_0966_F	CAAACAGCAGGCCAGTGAAC	SP_0966_R	TGGTCTTGGTCGTTAGGCAC
SP_1382	alpha-amylase	SP_1382_F	ACTGTCCGCACCAAGTATGG	SP_1382_R	AAAGGCTTCCCTGTGATCGG
SP_1405	transcriptional regulator Spx	SP_1405_F	GTCGTAAGGCTAAGGCCTGG	SP_1405_R	GGTCAAGGAAAGGATGTGTTGC
SP_1449	C3-degrading proteinase	SP_1449_F	TGAAACCCTTGGAATGAAGGC	SP_1449_R	CGAGTACGCATACTGGGAGC
SP_1450	platelet activating factor	SP_1450_F	TCCGTTGCTCGCGATTATCC	SP_1450_R	CTGGCACAAATTCCACCTGC
SP_1489	elongation factor Tu	SP_1489_F	ACGTCGCTTGCCTTCATCAG	SP_1489_R	CGTGCGCAGTGTTGATAGTG
SP_1514	ATP synthase F0F1 subunit C	SP_1514_F	CTGTATGGGCGTATCTGTCGG	SP_1514_R	CATCAAACTACGAAACTCAGAAAGC
SP_1573	lysozyme	SP_1573_F	TATCTTTGCGGCCTCTGGTG	SP_1573_R	GCATGTTCGGTTCCCACTTG
SP_1584	transcriptional repressor CodY	SP_1584_F	TGAAACGCTCAGAGGAGCAG	SP_1584_R	AATAGCCAAGCAGACGTCCC
SP_1666	cell division protein FtsZ	SP_1666_F	TCGACGAAGGTGTTACAGGC	SP_1666_R	CTCAGGTTGACCTCCTGCAC
SP_1667	cell division protein FtsA	SP_1667_F	CTCGCAAATTAGCGGAAGGC	SP_1667_R	TCCGTCACTTCGACTGCTTC
SP_1687	neuraminidase B	SP_1687_F	TTGTTGCCTCCGTTCTTAGG	SP_1687_R	AAACGGAATTGAAGCTGAGG
SP_1702	preprotein translocase subunit SecA	SP_1702_F	AGCTGGTGTTCCTCACGAAG	SP_1702_R	GTTGGTTGCGATGGTAACGG
SP_1759	preprotein translocase subunit SecA	SP_1759_F	TATTGCGGGTTCTCCTCGTG	SP_1759_R	ATTCTCAGCAGACTTGGCCC
SP_1763	preprotein translocase subunit SecY	SP_1763_F	TGAATCCTGCAGGTGGGATG	SP_1763_R	CCCACAAAGGCTTTCCAACC
SP_1772	cell wall surface anchor family protein	SP_1772_F	AACCCTTGGCAGTGATCTTG	SP_1772_R	ATTCATTTGGGCACCATTTC
SP_1778	aquaporin	SP_1778_F	GTATTCGTCGGGACAGGAGC	SP_1778_R	ATTGAGTAGGCTGCCACCAC
SP_1898	alpha-galactosidase	SP_1898_F	TGATGCCATTGCACGTTTACC	SP_1898_R	GCTACAAGGCCACGTGTTTC
SP_1906	molecular chaperone GroEL	SP_1906_F	TCATCAGATGCCCGTTCAGC	SP_1906_R	CTTTGGCAATGGTCACACCG
SP_1907	co-chaperonin GroES	SP_1907_F	TGGAGGCTTTGTCCTTGCAG	SP_1907_R	GAGCAACCAAGTCACCGTTC
SP_1911	thioredoxin	SP_1911_F	AGACTGGTGTAGCGATTGTCG	SP_1911_R	CGTAAACATCCCAGAGTTTGGC
SP_1923	pneumolysin	SP_1923_F	CAGTCGCCTCTATCCTGGAG	SP_1923_R	AGCCAACAAATCGTTTACCG
SP_1937	autolysin	SP_1937_F	CTCGCACATTGTTGGGAACG	SP_1937_R	TCAACCGCTGCATAGGTCTC
SP_1948	hypothetical protein	SP_1948_F	TAATTTATGGTGCATCTGATGGTGC	SP_1948_R	AGCTGCACTAATGCATACTTTC
SP_1949	hypothetical protein	SP_1949_F	GGTTTATGGTGGCACAGATGG	SP_1949_R	GTCTTTGCCACAACGAGTCTG
SP_1992	cell wall surface anchor family protein	SP_1992_F	GGGTGGATCAGCTCACACAG	SP_1992_R	ATCCTGCTTGTCCTTGGCTG
SP_1999	catabolite control protein A	SP_1999_F	TGATGAGTTGGCAGCAGGAG	SP_1999_R	CGTTGTCAAGTTTGGACGGG
SP_2136	choline binding protein PcpA	SP_2136_F	CTGGTTGGGTTACAGTTTCTGG	SP_2136_R	CCTACCCACTCACCGTTAGC
SP_2169	zinc ABC transporter zinc-binding lipoprotein	SP_2169_F	TTTGTGACTCAACACGCAGC	SP_2169_R	CAATTCTGCCAAGCGAGCAG
SP_2170	zinc ABC transporter permease	SP_2170_F	TGCCAGTTCGTACCATGTCC	SP_2170_R	AGACGCAGGGCAATACTAGC
SP_2171	zinc ABC transporter ATP-binding protein	SP_2171_F	TGCAACCACGCATTGGAAAG	SP_2171_R	GGATAGCGACCCGACTTGAC
SP_2184	glycerol uptake facilitator protein	SP_2184_F	GTTGCAGGTGTGGTTCTTCC	SP_2184_R	TAAGCTGGACTGAGCTTGCC
SP_2185	hypothetical protein	SP_2185_F	ACCTCTTGGCAGGTGTTAGC	SP_2185_R	GAGACGCGCATCGTTGTTAC
SP_2186	glycerol kinase	SP_2186_F	GGTCTAGGCGCTCCATACTG	SP_2186_R	CCACTTGCATGGTGTCGATG
SP_2190	choline binding protein A	SP_2190_F	ACAGGTTGGGTGAAAGATGG	SP_2190_R	CATTCACCATTGGCATTGAC
SP_2235	response regulator ComE	SP_2235_F	TCCAATATCATACAAGACAACGGG	SP_2235_R	TGACGAATGAGCTGAGCCAC
SP_2236	sensor histidine kinase ComD	SP_2236_F	AATGCTGTCGAAGGATCGGC	SP_2236_R	TCTCCTGAAGGAGTCATCGTC
SP_2237	competence stimulating peptide 2	SP_2237_F	CACAGTTAAATTGGAACAGTTTGTAGC	SP_2237_R	TTGAAATCCTCATCTCCCCACC
SP_2135	ribosomal protein L33	SP_2135_F	AACACAAAGAATCTGGTGAACG	SP_2135_R	AACACAACGTGTTTGCGAAG
SP_0002	DNA polymerase III, beta subunit	SP_0002_F	TTCCTAGCCGTTCTCTACGC	SP_0002_R	TGTTGGAATCAAGCGATCTG
SP_0085	ribosomal protein S4	SP_0085_F	GGACCATCTTGGAAACAAGC	SP_0085_R	GCCAATTGCAAACCGTATTC
